# Supplementary material for: The Impact of CpG Island on Defining Transcriptional Activation of the Mouse L1 Retrotransposable Elements
Source: PubMed Central journal article supplement (PMC2894050; doi:10.1371/journal.pone.0011353), 2010-06-29
Supplement: pone.0011353.s001.pdf [file pone.0011353.s001.pdf]

**Table 1: The statistical analysis of the number of monomers in three subfamilies**

|                      | <b>A subfamily</b> | <b>TF subfamily</b> | <b>GF subfamily</b> |
|----------------------|--------------------|---------------------|---------------------|
| Number of values     | 473                | 875                 | 116                 |
| Minimum              | 1                  | 1                   | 2                   |
| 25% Percentile       | 3                  | 3                   | 4                   |
| Median               | 4                  | 4                   | 5                   |
| 75% Percentile       | 5                  | 5                   | 7                   |
| Maximum              | 17                 | 12                  | 15                  |
| Mean                 | 4.264              | 4.114               | 5.397               |
| Std. Deviation       | 2.019              | 1.771               | 2.303               |
| Std. Error           | 0.09283            | 0.05989             | 0.2138              |
| Lower 95% CI of mean | 4.082              | 3.997               | 4.973               |
| Upper 95% CI of mean | 4.447              | 4.232               | 5.82                |
| Sum                  | 2017               | 3600                | 626                 |

**One sample t test**

|                           |                |                |                |
|---------------------------|----------------|----------------|----------------|
| Theoretical mean          | 0              | 0              | 0              |
| Actual mean               | 4.264          | 4.114          | 5.397          |
| Discrepancy               | -4.264         | -4.114         | -5.397         |
| 95% CI of discrepancy     | 4.082 to 4.446 | 3.997 to 4.232 | 4.973 to 5.820 |
| t, df                     | t=45.94 df=472 | t=68.70 df=874 | t=25.24 df=115 |
| P value (two tailed)      | P<0.0001       | P<0.0001       | P<0.0001       |
| Significant (alpha=0.05)? | Yes            | Yes            | Yes            |
| Sum                       | 2017           | 3600           | 626            |

**One-way analysis of variance**

|                                            |          |
|--------------------------------------------|----------|
| P value                                    | P<0.0001 |
| P value summary                            | ***      |
| Are means signif. different? (P < 0.05)    | Yes      |
| Number of groups                           | 3        |
| F                                          | 23.32    |
| R squared                                  | 0.03093  |
| Bartlett's test for equal variances        |          |
| Bartlett's statistic (corrected)           | 21.48    |
| P value                                    | P<0.0001 |
| P value summary                            | ***      |
| Do the variances differ signif. (P < 0.05) | Yes      |

| <b>ANOVA Table</b>          | <b>SS</b> | <b>df</b> | <b>MS</b> |
|-----------------------------|-----------|-----------|-----------|
| Treatment (between columns) | 168.4     | 2         | 84.2      |
| Residual (within columns)   | 5276      | 1461      | 3.611     |
| Total                       | 5445      | 1463      |           |
