# Supplementary material for: The Impact of CpG Island on Defining Transcriptional Activation of the Mouse L1 Retrotransposable Elements
Source: PubMed Central journal article supplement (PMC2894050; doi:10.1371/journal.pone.0011353), 2010-06-29
Supplement: pone.0011353.s002.pdf [file pone.0011353.s002.pdf]

**Table 2: The distribution of L1 elements in mouse chromosomes and the statistical analysis of correlations between chromosome size and L1 density.**

| Chromosome | Chromosome Size (bp) | L1 size (bp) | Ratio (%) | L1 number |
|------------|----------------------|--------------|-----------|-----------|
| 1          | 197069962            | 898963       | 0.46      | 86        |
| 2          | 181976762            | 1792916      | 0.99      | 172       |
| 3          | 159872112            | 812727       | 0.51      | 77        |
| 4          | 155029701            | 1663515      | 1.07      | 159       |
| 5          | 152003063            | 639855       | 0.42      | 61        |
| 6          | 149525685            | 617732       | 0.41      | 59        |
| 7          | 145134094            | 597276       | 0.41      | 57        |
| 8          | 132085098            | 604507       | 0.46      | 58        |
| 9          | 124000669            | 302175       | 0.24      | 29        |
| 10         | 129959148            | 470071       | 0.36      | 45        |
| 11         | 121798632            | 826095       | 0.68      | 79        |
| 12         | 120463159            | 479947       | 0.40      | 46        |
| 13         | 120614378            | 378225       | 0.31      | 35        |
| 14         | 123978870            | 510995       | 0.41      | 48        |
| 15         | 103492577            | 386611       | 0.37      | 37        |
| 16         | 98252459             | 396399       | 0.40      | 38        |
| 17         | 95177420             | 260458       | 0.27      | 25        |
| 18         | 90736837             | 745848       | 0.82      | 71        |
| 19         | 61321190             | 260551       | 0.42      | 25        |
| X          | 165556469            | 2996914      | 1.81      | 286       |
| Y          | 16029404             | 83565        | 0.52      | 8         |
| Total      | 2644077689           | 15725345     | 0.59      | 1501      |

**Cross correlation coefficient test**

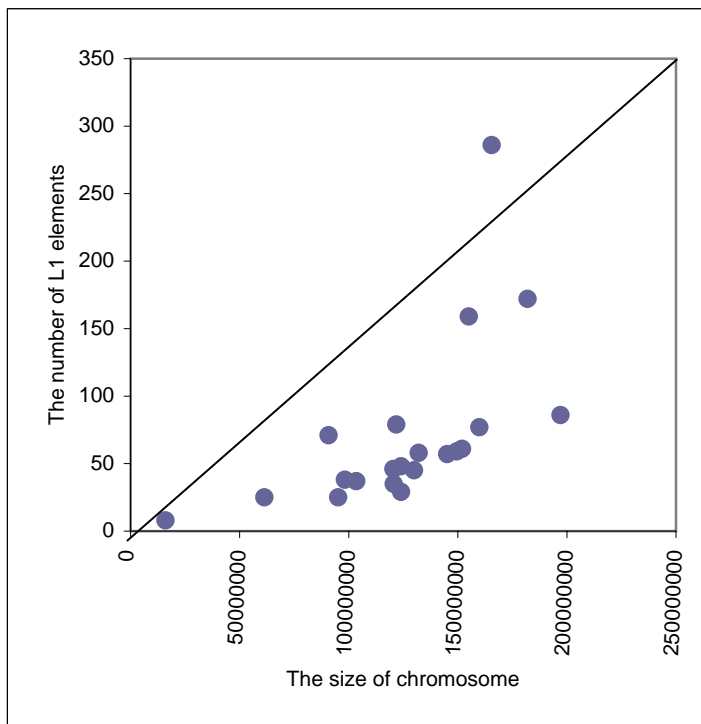

Number of XY Pairs 21  
 Pearson r (correlation) 0.5885  
 95% confidence interval 0.2102 to 0.8136  
 P value (two-tailed) 0.005  
 P value summary \*\*  
 Correlation significant? (alpha=0.05) Yes  
 R squared 0.3464

**Chi-square**  
 Chi-square, df 637.7, 20  
 P value P<0.0001  
 P value summary \*\*\*  
 One- or two-sided NA  
 Statistically significant? (alpha<0.05) Yes

## Supplementary Method

### Statistical analysis

The correlation between size of the chromosome and density of L1 elements on each individual chromosome was analyzed by cross correlation coefficient test (Pearson's test).

$$\text{Correl}(X, Y) = \frac{\sum (x - \bar{x})(y - \bar{y})}{\sqrt{\sum (x - \bar{x})^2 \sum (y - \bar{y})^2}}$$

(X and Y represent the average size of chromosome and L1 elements, respectively).

To test the statistical analysis of correlation between the number of L1 elements and expected frequency of L1s per chromosome, the determination coefficient ( $R^2$ ) test and Chi-square test were used.

Determination coefficient:

$$R^2 = 1 - \frac{\sum_{i=1}^n (\text{real}_i - \text{obs}_i)^2}{\sum_{i=1}^n (\text{real}_i - \text{real}_i)^2}$$

(The 'real' represents the actual frequency of L1 elements. The 'obs' indicates the expected frequency of L1 elements; n= number of chromosome)

Chi-square test:

$$X^2 = \sum_{i=1}^r \sum_{j=1}^c \frac{(A_{ij} - E_{ij})^2}{E_{ij}}$$

( $A_{ij}$  representing the actual frequency of L1 elements;  $E_{ij}$  is the expected frequency of L1 elements (r) and c is the number of chromosome)
