# Supplementary material for: The Impact of CpG Island on Defining Transcriptional Activation of the Mouse L1 Retrotransposable Elements
Source: PubMed Central journal article supplement (PMC2894050; doi:10.1371/journal.pone.0011353), 2010-06-29
Supplement: pone.0011353.s003.pdf [file pone.0011353.s003.pdf]

**Table 3: The distribution of L1 elements in intergenic regions in mouse chromosomes**

| Chromosome | Size (bp)  | The size of intergenic L1s (bp) | Ratio | L1 number | Expected frequency * |
|------------|------------|---------------------------------|-------|-----------|----------------------|
| 1          | 197069962  | 627440                          | 0.32% | 60        | 71.18                |
| 2          | 181976762  | 1135569                         | 0.62% | 109       | 65.73                |
| 3          | 159872112  | 562346                          | 0.35% | 53        | 57.74                |
| 4          | 155029701  | 1002718                         | 0.65% | 96        | 55.99                |
| 5          | 152003063  | 357762                          | 0.24% | 34        | 54.90                |
| 6          | 149525685  | 440190                          | 0.29% | 42        | 54.01                |
| 7          | 145134094  | 346393                          | 0.24% | 33        | 52.42                |
| 8          | 132085098  | 458440                          | 0.35% | 44        | 47.71                |
| 9          | 124000669  | 166674                          | 0.13% | 16        | 44.79                |
| 10         | 129959148  | 332878                          | 0.26% | 32        | 46.94                |
| 11         | 121798632  | 502511                          | 0.41% | 48        | 43.99                |
| 12         | 120463159  | 333804                          | 0.28% | 32        | 43.51                |
| 13         | 120614378  | 252983                          | 0.21% | 23        | 43.56                |
| 14         | 123978870  | 416948                          | 0.34% | 39        | 44.78                |
| 15         | 103492577  | 240477                          | 0.23% | 23        | 37.38                |
| 16         | 98252459   | 281559                          | 0.29% | 27        | 35.49                |
| 17         | 95177420   | 135203                          | 0.14% | 13        | 34.38                |
| 18         | 90736837   | 464309                          | 0.51% | 44        | 32.77                |
| 19         | 61321190   | 125080                          | 0.20% | 12        | 22.15                |
| X          | 165556469  | 1781034                         | 1.08% | 170       | 59.80                |
| Y          | 16029404   | 52242                           | 0.33% | 5         | 5.79                 |
| Total      | 2644077689 | 10016560                        | 0.38% | 955       | 955                  |

\* Expected frequency of L1 per chromosome  
 (= Each chromosome size/total chromosome size x total L1 numbers)

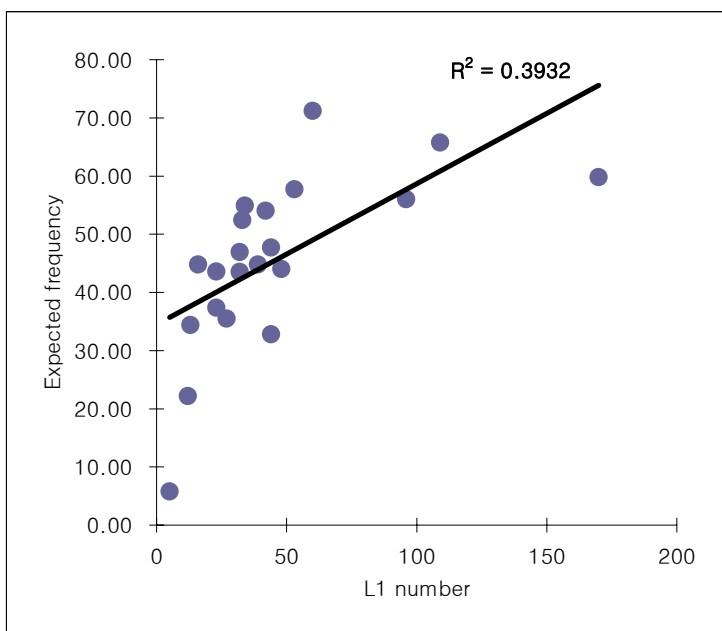

Chi-square, df 3.339, 1  
 P value 0.0677  
 P value summary ns  
 One- or two-sided NA  
 Statistically significant? (alpha<0.05) No  
 Data analyzed  
 Number of rows 21  
 Number of columns 2
