# Supplementary material for: The Impact of CpG Island on Defining Transcriptional Activation of the Mouse L1 Retrotransposable Elements
Source: PubMed Central journal article supplement (PMC2894050; doi:10.1371/journal.pone.0011353), 2010-06-29
Supplement: pone.0011353.s004.pdf [file pone.0011353.s004.pdf]

**Table 4: The distribution of L1 elements with neighbouring genes in mouse chromosomes**

| Chromosome | Size (bp)  | The size of intergenic L1s (bp) | Ratio | L1 number | Expected frequency * |
|------------|------------|---------------------------------|-------|-----------|----------------------|
| 1          | 197069962  | 271027                          | 0.14% | 26        | 40.69                |
| 2          | 181976762  | 656287                          | 0.36% | 63        | 37.58                |
| 3          | 159872112  | 249848                          | 0.16% | 24        | 33.01                |
| 4          | 155029701  | 660067                          | 0.43% | 63        | 32.01                |
| 5          | 152003063  | 281741                          | 0.19% | 27        | 31.39                |
| 6          | 149525685  | 177326                          | 0.12% | 17        | 30.88                |
| 7          | 145134094  | 250477                          | 0.17% | 24        | 29.97                |
| 8          | 132085098  | 145539                          | 0.11% | 14        | 27.28                |
| 9          | 124000669  | 135312                          | 0.11% | 13        | 25.61                |
| 10         | 129959148  | 137114                          | 0.11% | 13        | 26.84                |
| 11         | 121798632  | 325375                          | 0.27% | 31        | 25.15                |
| 12         | 120463159  | 146170                          | 0.12% | 14        | 24.88                |
| 13         | 120614378  | 125145                          | 0.10% | 12        | 24.91                |
| 14         | 123978870  | 93968                           | 0.08% | 9         | 25.60                |
| 15         | 103492577  | 146025                          | 0.14% | 14        | 21.37                |
| 16         | 98252459   | 114769                          | 0.12% | 11        | 20.29                |
| 17         | 95177420   | 125164                          | 0.13% | 12        | 19.65                |
| 18         | 90736837   | 284036                          | 0.31% | 27        | 18.74                |
| 19         | 61321190   | 135390                          | 0.22% | 13        | 12.66                |
| X          | 165556469  | 1218526                         | 0.74% | 116       | 34.19                |
| Y          | 16029404   | 31323                           | 0.20% | 3         | 3.31                 |
| Total      | 2644077689 | 5710629                         | 0.22% | 546       | 546                  |

\* Expected frequency of L1 per chromosome  
 (= Each chromosome size/total chromosome size x total L1 numbers)

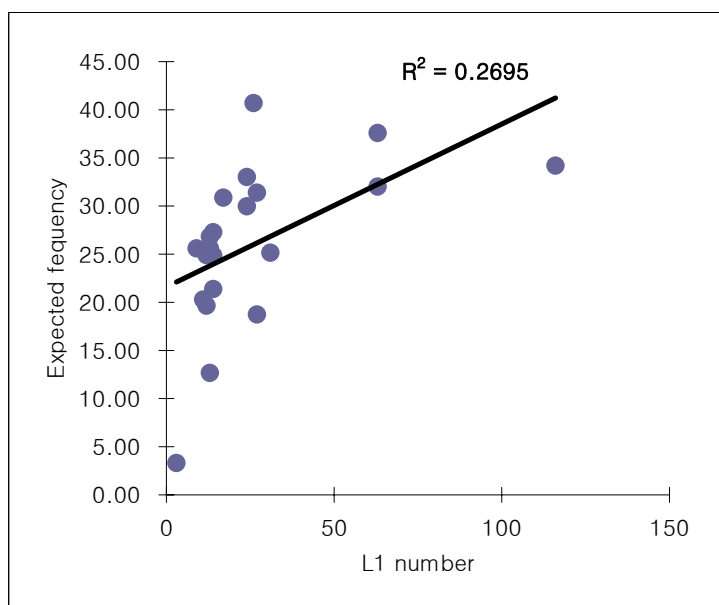

|                                            |          |
|--------------------------------------------|----------|
| Chi-square, df                             | 6.688, 1 |
| P value                                    | 0.0097   |
| P value summary                            | **       |
| One- or two-sided                          | NA       |
| Statistically significant?<br>(alpha<0.05) | Yes      |
| Data analyzed                              |          |
| Number of rows                             | 21       |
| Number of columns                          | 2        |
