# Supplementary material for: The Impact of CpG Island on Defining Transcriptional Activation of the Mouse L1 Retrotransposable Elements
Source: PubMed Central journal article supplement (PMC2894050; doi:10.1371/journal.pone.0011353), 2010-06-29
Supplement: pone.0011353.s005.pdf [file pone.0011353.s005.pdf]

**Table 5: The list of L1s' neighbouring genes and their locations**

| No | LINE ID | chr number | refseq ID    | LINE start | LINE end | refseq start | refseq end | LINE strand | Distance | refseq strand | Orientation | Refseq Difinition                                |
|----|---------|------------|--------------|------------|----------|--------------|------------|-------------|----------|---------------|-------------|--------------------------------------------------|
| 1  | UID2    | chr18      | NM_026092    | 4219421    | 4229862  | 4165829      | 4182234    | +           | -100k    | +             | S           | lysozyme-like 1 precursor                        |
| 2  | UID4    | chr18      | NM_001100449 | 14872664   | 14883105 | 14926262     | 15043377   | +           | +100k    | +             | AS          | TAF4B RNA polymerase II, TATA box binding        |
| 3  | UID4    | chr18      | NM_001163609 | 14872664   | 14883105 | 14849168     | 14905317   | +           | -50k     | +             | S           | proteasome alpha 8 subunit                       |
| 4  | UID10   | chr18      | NM_001033532 | 25353995   | 25364027 | 25312029     | 25610331   | +           | -50k     | +             | S           | hypothetical protein LOC225289                   |
| 5  | UID10   | chr18      | NM_001142697 | 25353995   | 25364027 | 25279055     | 25308975   | +           | -100k    | -             | AS          | tubulin polyglutamylase complex subunit 2        |
| 6  | UID10   | chr18      | NM_001142698 | 25353995   | 25364027 | 25270232     | 25311887   | +           | -100k    | -             | AS          | tubulin polyglutamylase complex subunit 2        |
| 7  | UID10   | chr18      | NM_001004361 | 25353995   | 25364027 | 25279055     | 25311887   | +           | -100k    | -             | AS          | tubulin polyglutamylase complex subunit 2        |
| 8  | UID11   | chr18      | NM_001109988 | 33516959   | 33527400 | 33561829     | 33588840   | +           | +50k     | -             | AS          | neuronal protein 3.1                             |
| 9  | UID11   | chr18      | NM_053078    | 33516959   | 33527400 | 33561829     | 33588445   | +           | +50k     | -             | AS          | neuronal protein 3.1                             |
| 10 | UID11   | chr18      | NM_001109990 | 33516959   | 33527400 | 33561829     | 33588232   | +           | +50k     | -             | AS          | neuronal protein 3.1                             |
| 11 | UID11   | chr18      | NM_001109989 | 33516959   | 33527400 | 33561829     | 33588558   | +           | +50k     | -             | AS          | neuronal protein 3.1                             |
| 12 | UID13   | chr18      | NM_011901    | 37753607   | 37764050 | 37767995     | 37770121   | +           | +20k     | -             | AS          |                                                  |
| 13 | UID13   | chr18      | NM_033587    | 37753607   | 37764050 | 37811373     | 37967844   | +           | +100k    | +             | AS          | protocadherin gamma subfamily A, 4               |
| 14 | UID13   | chr18      | NM_033589    | 37753607   | 37764050 | 37833202     | 37967844   | +           | +100k    | +             | AS          | protocadherin gamma subfamily A, 6               |
| 15 | UID13   | chr18      | NM_033575    | 37753607   | 37764050 | 37815832     | 37967846   | +           | +100k    | +             | AS          | protocadherin gamma subfamily B, 2               |
| 16 | UID13   | chr18      | NM_033586    | 37753607   | 37764050 | 37800308     | 37967846   | +           | +50k     | +             | AS          | protocadherin gamma subfamily A, 3               |
| 17 | UID13   | chr18      | NM_033588    | 37753607   | 37764050 | 37820474     | 37967844   | +           | +100k    | +             | AS          | protocadherin gamma subfamily A, 5               |
| 18 | UID13   | chr18      | NM_175770    | 37753607   | 37764050 | 37766464     | 37770178   | +           | +20k     | -             | AS          | TAF7 RNA polymerase II, TATA box binding protein |
| 19 | UID13   | chr18      | NM_033590    | 37753607   | 37764050 | 37840807     | 37967846   | +           | +100k    | +             | AS          | protocadherin gamma subfamily A, 7               |
| 20 | UID13   | chr18      | NM_033585    | 37753607   | 37764050 | 37795078     | 37967844   | +           | +50k     | +             | AS          | protocadherin gamma subfamily A, 2               |
| 21 | UID13   | chr18      | NM_033576    | 37753607   | 37764050 | 37846527     | 37967844   | +           | +100k    | +             | AS          | protocadherin gamma subfamily B, 4               |
| 22 | UID13   | chr18      | NM_033584    | 37753607   | 37764050 | 37787918     | 37967844   | +           | +50k     | +             | AS          | protocadherin gamma subfamily A, 1               |
| 23 | UID13   | chr18      | NM_033574    | 37753607   | 37764050 | 37806431     | 37967844   | +           | +100k    | +             | AS          | protocadherin gamma subfamily B, 1               |
| 24 | UID13   | chr18      | NM_033591    | 37753607   | 37764050 | 37851679     | 37967846   | +           | +100k    | +             | AS          | protocadherin gamma subfamily A, 8               |
| 25 | UID13   | chr18      | NM_001159275 | 37753607   | 37764050 | 37763351     | 37764697   | +           | +10k     | -             | AS          | mutant ornithine transporter 2                   |
| 26 | UID15   | chr18      | NM_001004061 | 50375808   | 50386206 | 50403698     | 50408349   | +           | +50k     | +             | AS          | family with sequence similarity 170, member A    |
| 27 | UID19   | chr18      | NM_001001979 | 57336493   | 57346879 | 57258843     | 57422835   | +           | -100k    | +             | S           | MEGF10 protein precursor                         |
| 28 | UID21   | chr18      | NM_016977    | 67062625   | 67075740 | 66983076     | 66985841   | +           | -100k    | -             | AS          | melanocortin 4 receptor                          |
| 29 | UID22   | chr18      | NM_029019    | 70632240   | 70642681 | 70597913     | 70626432   | +           | -50k     | +             | S           | START domain containing protein 6                |
| 30 | UID22   | chr18      | NM_172967    | 70632240   | 70642681 | 70578508     | 70597849   | +           | -100k    | -             | AS          | hypothetical protein LOC269033 precursor         |
| 31 | UID22   | chr18      | NM_010773    | 70632240   | 70642681 | 70693660     | 70751500   | +           | +100k    | +             | AS          | methyl-CpG binding domain protein 2              |
| 32 | UID22   | chr18      | NM_001136090 | 70632240   | 70642681 | 70634049     | 70655507   | +           | +5k      | -             | AS          | DNA polymerase iota isoform 1                    |
| 33 | UID22   | chr18      | NM_011972    | 70632240   | 70642681 | 70634049     | 70655690   | +           | +5k      | -             | AS          | DNA polymerase iota isoform 2                    |
| 34 | UID27   | chr18      | NM_001109743 | 76987662   | 76998098 | 77060854     | 77104792   | +           | +100k    | +             | AS          | functional Smad suppressor element on chromosome |
| 35 | UID28   | chr18      | NM_053099    | 78856552   | 78866993 | 78912458     | 79271470   | +           | +100k    | -             | AS          | SET binding protein 1                            |
| 36 | UID30   | chr18      | NM_026295    | 80664777   | 80675218 | 80570017     | 80631726   | +           | -100k    | -             | AS          | CTD (carboxy-terminal domain, RNA polymerase II  |
| 37 | UID35   | chr18      | NM_178687    | 89268102   | 89278542 | 89331619     | 89404520   | +           | +100k    | +             | AS          | platelet and T cell activation antigen 1 isoform |

|    |       |       |              |          |          |          |          |   |       |   |    |                                                  |
|----|-------|-------|--------------|----------|----------|----------|----------|---|-------|---|----|--------------------------------------------------|
| 38 | UID35 | chr18 | NM_001039149 | 89268102 | 89278542 | 89331619 | 89404520 | + | +100k | + | AS | platelet and T cell activation antigen 1 isoform |
| 39 | UID37 | chr18 | NM_018821    | 89073018 | 89083416 | 89002072 | 89028400 | - | -100k | - | AS | suppressor of cytokine signaling 6               |
| 40 | UID37 | chr18 | NM_175542    | 89073018 | 89083416 | 89105982 | 89265207 | - | +50k  | - | AS | rotatin                                          |
| 41 | UID45 | chr18 | NM_023149    | 84737021 | 84747419 | 84801661 | 84819826 | - | +100k | - | S  | CNDP dipeptidase 2                               |
| 42 | UID45 | chr18 | NM_177450    | 84737021 | 84747419 | 84744701 | 84784288 | - | +10k  | - | S  | carnosine dipeptidase 1                          |
| 43 | UID46 | chr18 | NM_178280    | 81041243 | 81051726 | 81128432 | 81148637 | - | +100k | - | S  | sal-like protein 3                               |
| 44 | UID47 | chr18 | NM_145356    | 76008492 | 76018936 | 75945542 | 76273929 | - | -100k | + | AS | zinc finger and BTB domain containing 7C         |
| 45 | UID50 | chr18 | NM_008560    | 68599604 | 68610050 | 68532275 | 68554628 | - | -100k | - | AS | melanocortin 2 receptor                          |
| 46 | UID52 | chr18 | NM_001001803 | 62744025 | 62754423 | 62717782 | 62721633 | - | -50k  | - | AS | serine peptidase inhibitor, Kazal type 7         |
| 47 | UID52 | chr18 | NM_177829    | 62744025 | 62754423 | 62674279 | 62786757 | - | -100k | + | AS | serine protease inhibitor Kazal type 10          |
| 48 | UID53 | chr18 | NM_008313    | 62410752 | 62421193 | 62449572 | 62593171 | - | +50k  | + | AS | serotonin 5-HT4 receptor                         |
| 49 | UID54 | chr18 | NM_001033281 | 53684849 | 53695289 | 53589914 | 53701226 | - | -100k | + | AS | PR domain containing 6                           |
| 50 | UID55 | chr18 | NM_026108    | 50656147 | 50666545 | 50692840 | 50693884 | - | +50k  | - | S  | haloacid dehalogenase-like hydrolase domain      |
| 51 | UID56 | chr18 | NM_001004061 | 50386305 | 50396746 | 50403698 | 50408349 | - | +20k  | + | AS | family with sequence similarity 170, member A    |
| 52 | UID61 | chr18 | NM_198117    | 37156790 | 37167231 | 37065178 | 37313632 | - | -100k | + | AS | protocadherin alpha 2                            |
| 53 | UID61 | chr18 | NM_138662    | 37156790 | 37167231 | 37072180 | 37313631 | - | -100k | + | AS | protocadherin alpha 3                            |
| 54 | UID61 | chr18 | NM_007766    | 37156790 | 37167231 | 37078662 | 37313631 | - | -100k | + | AS | protocadherin alpha 4 precursor                  |
| 55 | UID61 | chr18 | NM_009959    | 37156790 | 37167231 | 37086413 | 37313631 | - | -100k | + | AS | protocadherin alpha 5                            |
| 56 | UID61 | chr18 | NM_007767    | 37156790 | 37167231 | 37093729 | 37313631 | - | -100k | + | AS | protocadherin alpha 6                            |
| 57 | UID61 | chr18 | NM_009957    | 37156790 | 37167231 | 37099897 | 37313631 | - | -100k | + | AS | protocadherin alpha 7                            |
| 58 | UID61 | chr18 | NM_201243    | 37156790 | 37167231 | 37118440 | 37313631 | - | -50k  | + | AS | protocadherin alpha 8                            |
| 59 | UID61 | chr18 | NM_138661    | 37156790 | 37167231 | 37123853 | 37313631 | - | -50k  | + | AS | protocadherin alpha 9                            |
| 60 | UID61 | chr18 | NM_009961    | 37156790 | 37167231 | 37131293 | 37313631 | - | -50k  | + | AS | protocadherin alpha 10                           |
| 61 | UID61 | chr18 | NM_138663    | 37156790 | 37167231 | 37146203 | 37313631 | - | -20k  | + | AS | protocadherin alpha 12                           |
| 62 | UID61 | chr18 | NM_009960    | 37156790 | 37167231 | 37136831 | 37313631 | - | -20k  | + | AS | protocadherin alpha 11                           |
| 63 | UID61 | chr18 | NM_001003671 | 37156790 | 37167231 | 37216109 | 37313631 | - | +100k | + | AS | protocadherin alpha subfamily C, 1               |
| 64 | UID62 | chr18 | NM_001042768 | 32185574 | 32196060 | 32266135 | 32281215 | - | +100k | - | S  | protein C                                        |
| 65 | UID62 | chr18 | NM_001042767 | 32185574 | 32196060 | 32266135 | 32282580 | - | +100k | - | S  | protein C                                        |
| 66 | UID62 | chr18 | NM_008934    | 32185574 | 32196060 | 32266135 | 32281215 | - | +100k | - | S  | protein C                                        |
| 67 | UID62 | chr18 | NM_032394    | 32185574 | 32196060 | 32102243 | 32179969 | - | -100k | - | AS | myosin VIIB                                      |
| 68 | UID62 | chr18 | NM_173441    | 32185574 | 32196060 | 32210743 | 32247341 | - | +50k  | + | AS | IWS1 homolog                                     |
| 69 | UID62 | chr18 | NM_001025381 | 32185574 | 32196060 | 32086023 | 32092646 | - | -100k | - | AS | G protein-coupled receptor 17                    |
| 70 | UID63 | chr18 | NM_026529    | 24711884 | 24722327 | 24613880 | 24620777 | - | -100k | + | AS | hypothetical protein LOC68046                    |
| 71 | UID63 | chr18 | NM_021448    | 24711884 | 24722327 | 24746970 | 24781840 | - | +50k  | + | AS | signal transducer and activator of transcription |
| 72 | UID63 | chr18 | NM_144861    | 24711884 | 24722327 | 24627971 | 24673214 | - | -100k | - | AS | cDNA sequence BC021395                           |
| 73 | UID63 | chr18 | NM_139143    | 24711884 | 24722327 | 24722890 | 24746827 | - | +20k  | - | S  | solute carrier family 39 (metal ion              |
| 74 | UID63 | chr18 | NM_026779    | 24711884 | 24722327 | 24796700 | 24844566 | - | +100k | + | AS | molybdenum cofactor sulfurase                    |
| 75 | UID64 | chr18 | NM_001162942 | 23930358 | 23940841 | 23895342 | 24036871 | - | -50k  | + | AS | microtubule-associated protein, RP/EB family     |
| 76 | UID64 | chr18 | NM_001162941 | 23930358 | 23940841 | 23896734 | 24036871 | - | -50k  | + | AS | microtubule-associated protein, RP/EB family     |
| 77 | UID64 | chr18 | NM_153058    | 23930358 | 23940841 | 23946979 | 24036871 | - | +20k  | + | AS | microtubule-associated protein, RP/EB family     |
| 78 | UID75 | chr3  | NM_008862    | 7291215  | 7301656  | 7349676  | 7428438  | + | +100k | + | AS | protein kinase inhibitor, alpha                  |
| 79 | UID89 | chr3  | NM_153384    | 58937494 | 58947892 | 58933143 | 58973141 | + | -5k   | - | AS | Usher syndrome 3A homolog isoform 1              |
| 80 | UID89 | chr3  | NM_153385    | 58937494 | 58947892 | 58933143 | 58973141 | + | -5k   | - | AS | Usher syndrome 3A homolog isoform 2              |

|     |        |      |              |           |           |           |           |   |       |   |    |                                                |
|-----|--------|------|--------------|-----------|-----------|-----------|-----------|---|-------|---|----|------------------------------------------------|
| 81  | UID89  | chr3 | NM_153386    | 58937494  | 58947892  | 58933143  | 58973141  | + | -5k   | - | AS | Usher syndrome 3A homolog isoform 3            |
| 82  | UID92  | chr3 | NM_028712    | 61529543  | 61539984  | 61452435  | 61456632  | + | -100k | + | S  | RAP2B, member of RAS oncogene family precursor |
| 83  | UID94  | chr3 | NM_001037923 | 65840901  | 65851134  | 65754163  | 65774108  | + | -100k | + | S  | hypothetical protein LOC624866                 |
| 84  | UID95  | chr3 | NM_145820    | 66156511  | 66166909  | 66142756  | 66384748  | + | -20k  | - | AS | VEPH isoform A                                 |
| 85  | UID95  | chr3 | NM_028357    | 66156511  | 66166909  | 66142756  | 66224367  | + | -20k  | - | AS | VEPH isoform B                                 |
| 86  | UID101 | chr3 | NM_001039195 | 80825590  | 80836031  | 80777418  | 80888718  | + | -50k  | - | AS | glutamate receptor, ionotropic, AMPA 2 isoform |
| 87  | UID101 | chr3 | NM_001083806 | 80825590  | 80836031  | 80770862  | 80888718  | + | -100k | - | AS | glutamate receptor, ionotropic, AMPA 2 isoform |
| 88  | UID101 | chr3 | NM_013540    | 80825590  | 80836031  | 80770862  | 80888718  | + | -100k | - | AS | glutamate receptor, ionotropic, AMPA 2 isoform |
| 89  | UID102 | chr3 | NM_025416    | 94351032  | 94361473  | 94427502  | 94432754  | + | +100k | + | AS | thioesterase superfamily member 5              |
| 90  | UID102 | chr3 | NM_029431    | 94351032  | 94361473  | 94395535  | 94417936  | + | +50k  | + | AS | thioesterase superfamily member 4              |
| 91  | UID102 | chr3 | NM_001136117 | 94351032  | 94361473  | 94447847  | 94449970  | + | +100k | + | AS | hypothetical protein LOC271944                 |
| 92  | UID102 | chr3 | NM_001146107 | 94351032  | 94361473  | 94259815  | 94263597  | + | -100k | - | AS | TD and POZ domain containing-like              |
| 93  | UID103 | chr3 | NM_011656    | 94632343  | 94642784  | 94698162  | 94744210  | + | +100k | - | AS | tuftelin 1                                     |
| 94  | UID103 | chr3 | NM_001082484 | 94632343  | 94642784  | 94586083  | 94668106  | + | -50k  | - | AS | sorting nexin family member 27 isoform 1       |
| 95  | UID103 | chr3 | NM_172434    | 94632343  | 94642784  | 94564234  | 94577597  | + | -100k | + | S  | CUG-BP and ETR-3 like factor 3                 |
| 96  | UID103 | chr3 | NM_029721    | 94632343  | 94642784  | 94582947  | 94668106  | + | -50k  | - | AS | sorting nexin family member 27 isoform 2       |
| 97  | UID103 | chr3 | NM_025506    | 94632343  | 94642784  | 94550388  | 94558995  | + | -100k | - | AS | RIIa domain-containing protein                 |
| 98  | UID104 | chr3 | NM_011516    | 102958973 | 102969411 | 102947559 | 103065161 | + | -20k  | - | AS | synaptonemal complex protein 1                 |
| 99  | UID104 | chr3 | NM_009432    | 102958973 | 102969411 | 102906458 | 102911775 | + | -100k | - | AS | thyroid stimulating hormone, beta subunit      |
| 100 | UID104 | chr3 | NM_027533    | 102958973 | 102969411 | 102863830 | 102901353 | + | -100k | + | S  | tetraspan 2                                    |
| 101 | UID105 | chr3 | NM_027193    | 115905527 | 115915968 | 115880186 | 115921327 | + | -50k  | + | S  | diphthine synthase                             |
| 102 | UID105 | chr3 | NM_021388    | 115905527 | 115915968 | 115999452 | 116021020 | + | +100k | + | AS | exostoses-like 2 isoform a                     |
| 103 | UID105 | chr3 | NM_001163514 | 115905527 | 115915968 | 116000300 | 116021020 | + | +100k | + | AS | exostoses-like 2 isoform a                     |
| 104 | UID105 | chr3 | NM_023214    | 115905527 | 115915968 | 115937948 | 115999383 | + | +50k  | - | AS | zinc transporter like 2                        |
| 105 | UID105 | chr3 | NM_001163515 | 115905527 | 115915968 | 115999452 | 116021020 | + | +100k | + | AS | exostoses-like 2 isoform b                     |
| 106 | UID105 | chr3 | NR_015487    | 115905527 | 115915968 | 115873582 | 115880134 | + | -50k  | - | AS |                                                |
| 107 | UID105 | chr3 | NR_027894    | 115905527 | 115915968 | 115873582 | 115880063 | + | -50k  | - | AS |                                                |
| 108 | UID105 | chr3 | NR_027895    | 115905527 | 115915968 | 115879151 | 115880124 | + | -50k  | - | AS |                                                |
| 109 | UID110 | chr3 | NM_021382    | 134816385 | 134826826 | 134766393 | 134871959 | + | -50k  | + | S  | tachykinin receptor 3                          |
| 110 | UID112 | chr3 | NM_030601    | 144763777 | 144774218 | 144734469 | 144756863 | + | -50k  | - | AS | chloride channel calcium activated 2           |
| 111 | UID112 | chr3 | NM_001039222 | 144763777 | 144774218 | 144816710 | 144833397 | + | +100k | - | AS | hypothetical protein LOC622139                 |
| 112 | UID112 | chr3 | NM_139148    | 144763777 | 144774218 | 144760009 | 144786688 | + | -5k   | - | AS | chloride channel calcium activated 4           |
| 113 | UID112 | chr3 | NM_009899    | 144763777 | 144774218 | 144667701 | 144698125 | + | -100k | - | AS | chloride channel calcium activated 1           |
| 114 | UID112 | chr3 | NM_001033199 | 144763777 | 144774218 | 144848306 | 144869915 | + | +100k | - | AS | calcium activated chloride channel             |
| 115 | UID117 | chr3 | NM_001081263 | 153959825 | 153970259 | 153910821 | 154207013 | - | -50k  | + | AS | solute carrier family 44, member 5             |
| 116 | UID118 | chr3 | NM_133871    | 151608945 | 151619386 | 151668308 | 151687345 | - | +100k | - | S  | interferon-induced protein 44                  |
| 117 | UID118 | chr3 | NM_031367    | 151608945 | 151619386 | 151696122 | 151700277 | - | +100k | - | S  | histocompatibility 28                          |
| 118 | UID124 | chr3 | NM_146139    | 109739860 | 109750258 | 109702062 | 109813750 | - | -50k  | + | AS | vav 3 oncogene isoform 2                       |
| 119 | UID127 | chr3 | NM_011478    | 92631281  | 92641679  | 92542221  | 92542938  | - | -100k | - | AS | small proline-rich protein 3                   |
| 120 | UID127 | chr3 | NM_009264    | 92631281  | 92641679  | 92569356  | 92571284  | - | -100k | - | AS | small proline-rich protein 1A                  |
| 121 | UID127 | chr3 | NM_173070    | 92631281  | 92641679  | 92585665  | 92585896  | - | -50k  | - | AS | small proline-rich protein 4                   |
| 122 | UID127 | chr3 | NM_008574    | 92631281  | 92641679  | 92669268  | 92674427  | - | +50k  | - | S  | sperm mitochondria-associated cysteine-rich    |
| 123 | UID127 | chr3 | NM_008412    | 92631281  | 92641679  | 92656304  | 92659118  | - | +50k  | - | S  | involucrin                                     |

|     |        |       |              |          |          |          |          |   |       |   |    |                                                 |
|-----|--------|-------|--------------|----------|----------|----------|----------|---|-------|---|----|-------------------------------------------------|
| 124 | UID129 | chr3  | NM_133187    | 80044402 | 80054843 | 79971856 | 80032204 | - | -100k | + | AS | expressed in nerve and epithelium during        |
| 125 | UID134 | chr3  | NM_001162884 | 59481278 | 59491719 | 59404663 | 59432185 | - | -100k | - | AS | immunoglobulin superfamily, member 10 precursor |
| 126 | UID135 | chr3  | NM_028808    | 59366813 | 59377211 | 59295824 | 59298811 | - | -100k | - | AS | purinergic receptor P2Y13                       |
| 127 | UID135 | chr3  | NM_032399    | 59366813 | 59377211 | 59266851 | 59268014 | - | -100k | - | AS | G protein-coupled receptor 87                   |
| 128 | UID135 | chr3  | NM_027571    | 59366813 | 59377211 | 59304199 | 59350760 | - | -100k | - | AS | purinergic receptor P2Y12                       |
| 129 | UID135 | chr3  | NM_001162884 | 59366813 | 59377211 | 59404663 | 59432185 | - | +50k  | - | S  | immunoglobulin superfamily, member 10 precursor |
| 130 | UID137 | chr3  | NM_026225    | 52997788 | 53008186 | 53070051 | 53105152 | - | +100k | - | S  | component of oligomeric golgi complex 6         |
| 131 | UID142 | chr3  | NM_172679    | 37037752 | 37047974 | 37054654 | 37244582 | - | +20k  | + | AS | fragile site-associated protein                 |
| 132 | UID145 | chr3  | NM_007963    | 30056212 | 30066653 | 30142376 | 30204277 | - | +100k | - | S  | MDS1 and EVI1 complex locus isoform 1           |
| 133 | UID147 | chr3  | NM_138666    | 25662948 | 25673346 | 25622913 | 26522982 | - | -50k  | - | AS | neuroligin 1 isoform 1                          |
| 134 | UID147 | chr3  | NM_001163387 | 25662948 | 25673346 | 25622913 | 26344380 | - | -50k  | - | AS | neuroligin 1 isoform 2                          |
| 135 | UID149 | chr3  | NM_001081687 | 16113715 | 16124158 | 16140220 | 16198483 | - | +50k  | - | S  | hypothetical protein LOC381484                  |
| 136 | UID152 | chr11 | NM_015785    | 11185074 | 11195515 | 11182515 | 11362411 | + | -5k   | - | AS | zona pellucida binding protein                  |
| 137 | UID158 | chr11 | NM_011023    | 21804003 | 21814444 | 21894766 | 21901654 | + | +100k | - | AS | orthodenticle 1                                 |
| 138 | UID160 | chr11 | NM_025923    | 26323933 | 26334374 | 26287083 | 26371876 | + | -50k  | + | S  | Fanconi anemia, complementation group L         |
| 139 | UID160 | chr11 | NM_027260    | 26323933 | 26334374 | 26371401 | 26493920 | + | +50k  | - | AS | vaccinia related kinase 2                       |
| 140 | UID161 | chr11 | NR_002890    | 26629847 | 26642710 | 26685107 | 26687859 | + | +100k | + | AS |                                                 |
| 141 | UID162 | chr11 | NM_133767    | 29335712 | 29346156 | 29426456 | 29445255 | + | +100k | + | AS | mitochondrial translational initiation factor 2 |
| 142 | UID162 | chr11 | NM_176841    | 29335712 | 29346156 | 29273774 | 29410811 | + | -100k | + | S  | coiled coil domain containing 88A               |
| 143 | UID162 | chr11 | NM_001163454 | 29335712 | 29346156 | 29412876 | 29415033 | + | +100k | - | AS | PrdX-deacylase domain 1 isoform 1               |
| 144 | UID162 | chr11 | NM_026465    | 29335712 | 29346156 | 29413054 | 29415033 | + | +100k | - | AS | PrdX-deacylase domain 1 isoform 2               |
| 145 | UID167 | chr11 | NM_013552    | 40474329 | 40484770 | 40544810 | 40576860 | + | +100k | - | AS | hyaluronan mediated motility receptor (RHAMM)   |
| 146 | UID167 | chr11 | NM_134017    | 40474329 | 40484770 | 40522736 | 40536036 | + | +50k  | - | AS | methionine adenosyltransferase II, beta         |
| 147 | UID168 | chr11 | NM_008073    | 41729980 | 41740466 | 41755279 | 41844101 | + | +50k  | - | AS | gamma-aminobutyric acid (GABA) A receptor,      |
| 148 | UID168 | chr11 | NM_177408    | 41729980 | 41740466 | 41753617 | 41843742 | + | +50k  | - | AS | gamma-aminobutyric acid (GABA) A receptor,      |
| 149 | UID172 | chr11 | NM_001045520 | 45611028 | 45621469 | 45695386 | 45754048 | + | +100k | + | AS | clathrin interactor 1                           |
| 150 | UID175 | chr11 | NM_146471    | 49183485 | 49193919 | 49123572 | 49124508 | + | -100k | + | S  | olfactory receptor 1393                         |
| 151 | UID175 | chr11 | NM_146470    | 49183485 | 49193919 | 49136745 | 49137681 | + | -50k  | + | S  | olfactory receptor 1392                         |
| 152 | UID175 | chr11 | NM_206822    | 49183485 | 49193919 | 49160970 | 49161906 | + | -50k  | + | S  | olfactory receptor 10                           |
| 153 | UID175 | chr11 | NM_146468    | 49183485 | 49193919 | 49170835 | 49171771 | + | -20k  | + | S  | olfactory receptor 1391                         |
| 154 | UID175 | chr11 | NM_147065    | 49183485 | 49193919 | 49183956 | 49184892 | + | +5k   | + | AS | olfactory receptor 1390                         |
| 155 | UID175 | chr11 | NM_147066    | 49183485 | 49193919 | 49273900 | 49274836 | + | +100k | + | AS | olfactory receptor 1389                         |
| 156 | UID175 | chr11 | NM_010794    | 49183485 | 49193919 | 49087613 | 49106447 | + | -100k | + | S  | mannoside acetylglucosaminyltransferase 1       |
| 157 | UID175 | chr11 | NM_001110148 | 49183485 | 49193919 | 49087613 | 49106447 | + | -100k | + | S  | mannoside acetylglucosaminyltransferase 1       |
| 158 | UID175 | chr11 | NM_001110150 | 49183485 | 49193919 | 49093974 | 49106447 | + | -100k | + | S  | mannoside acetylglucosaminyltransferase 1       |
| 159 | UID175 | chr11 | NM_001110149 | 49183485 | 49193919 | 49090899 | 49106447 | + | -100k | + | S  | mannoside acetylglucosaminyltransferase 1       |
| 160 | UID183 | chr11 | NM_001011863 | 74120033 | 74130474 | 74085585 | 74086557 | + | -50k  | + | S  | olfactory receptor 406                          |
| 161 | UID183 | chr11 | NM_146707    | 74120033 | 74130474 | 74150476 | 74151424 | + | +50k  | - | AS | olfactory receptor 410                          |
| 162 | UID183 | chr11 | NM_146709    | 74120033 | 74130474 | 74162844 | 74163777 | + | +50k  | - | AS | olfactory receptor 411                          |
| 163 | UID183 | chr11 | NM_001011851 | 74120033 | 74130474 | 74180865 | 74181804 | + | +100k | + | AS | olfactory receptor 412                          |
| 164 | UID183 | chr11 | NM_146711    | 74120033 | 74130474 | 74022392 | 74023484 | + | -100k | - | AS | olfactory receptor 43                           |
| 165 | UID183 | chr11 | NM_011002    | 74120033 | 74130474 | 74100003 | 74105841 | + | -50k  | + | S  | olfactory receptor 59                           |
| 166 | UID183 | chr11 | NM_001015046 | 74120033 | 74130474 | 74199677 | 74406353 | + | +100k | - | AS | RAP1 GTPase activating protein 2                |

|     |        |       |              |           |           |           |           |   |       |   |    |                                              |
|-----|--------|-------|--------------|-----------|-----------|-----------|-----------|---|-------|---|----|----------------------------------------------|
| 167 | UID185 | chr11 | NM_026433    | 89773707  | 89784148  | 89846437  | 89852595  | + | +100k | + | AS | transmembrane protein 100                    |
| 168 | UID185 | chr11 | NM_008796    | 89773707  | 89784148  | 89799506  | 89818984  | + | +50k  | - | AS | phosphatidylcholine transfer protein         |
| 169 | UID190 | chr11 | NM_010858    | 104464304 | 104474702 | 104366752 | 104403309 | - | -100k | + | AS | myosin, light polypeptide 4                  |
| 170 | UID190 | chr11 | NM_016780    | 104464304 | 104474702 | 104424089 | 104486561 | - | -50k  | + | AS | integrin beta 3 precursor                    |
| 171 | UID191 | chr11 | NM_001100614 | 99697964  | 99708363  | 99631065  | 99631756  | - | -100k | - | AS | hypothetical protein LOC670496               |
| 172 | UID191 | chr11 | NM_027568    | 99697964  | 99708363  | 99724009  | 99724980  | - | +50k  | + | AS | keratin associated protein 31-1              |
| 173 | UID191 | chr11 | NM_015741    | 99697964  | 99708363  | 99689529  | 99690090  | - | -10k  | + | AS | keratin associated protein 9-1               |
| 174 | UID191 | chr11 | NM_001101613 | 99697964  | 99708363  | 99695276  | 99696319  | - | -5k   | + | AS | hypothetical protein LOC670533               |
| 175 | UID191 | chr11 | NM_027087    | 99697964  | 99708363  | 99614162  | 99620536  | - | -100k | - | AS | keratin associated protein 4-13              |
| 176 | UID191 | chr11 | NM_001025244 | 99697964  | 99708363  | 99752380  | 99753315  | - | +100k | + | AS | keratin associated protein 31-2              |
| 177 | UID191 | chr11 | NM_001099313 | 99697964  | 99708363  | 99614275  | 99625982  | - | -100k | - | AS | keratin associated protein 4 family member   |
| 178 | UID191 | chr11 | NM_001099313 | 99697964  | 99708363  | 99619759  | 99620536  | - | -100k | - | AS | keratin associated protein 4 family member   |
| 179 | UID191 | chr11 | NM_027087    | 99697964  | 99708363  | 99625167  | 99625982  | - | -100k | - | AS | keratin associated protein 4-13              |
| 180 | UID191 | chr11 | NM_001085548 | 99697964  | 99708363  | 99601289  | 99602347  | - | -100k | + | AS | keratin associated protein 4 family member   |
| 181 | UID191 | chr11 | NM_001099312 | 99697964  | 99708363  | 99619637  | 99620536  | - | -100k | - | AS | keratin associated protein 4 family member   |
| 182 | UID191 | chr11 | NM_001099311 | 99697964  | 99708363  | 99608764  | 99609382  | - | -100k | - | AS | keratin associated protein 4 family member   |
| 183 | UID191 | chr11 | NM_001085527 | 99697964  | 99708363  | 99764564  | 99765641  | - | +100k | + | AS | keratin associated protein 9-5               |
| 184 | UID191 | chr11 | NM_001013823 | 99697964  | 99708363  | 99666744  | 99667695  | - | -50k  | - | AS | keratin associated protein 4-16              |
| 185 | UID191 | chr11 | NM_001126323 | 99697964  | 99708363  | 99730840  | 99731761  | - | +50k  | + | AS | hypothetical protein LOC670550               |
| 186 | UID192 | chr11 | NM_028547    | 91451985  | 91462382  | 91391375  | 91393645  | - | -100k | - | AS | kinesin family member 2B                     |
| 187 | UID193 | chr11 | NM_199008    | 90394219  | 90404660  | 90454273  | 90462067  | - | +100k | + | AS | COX11 homolog, cytochrome c oxidase assembly |
| 188 | UID193 | chr11 | NM_028011    | 90394219  | 90404660  | 90461780  | 90503691  | - | +100k | - | S  | target of myb1-like 1                        |
| 189 | UID194 | chr11 | NM_008796    | 89719144  | 89729585  | 89799506  | 89818984  | - | +100k | - | S  | phosphatidylcholine transfer protein         |
| 190 | UID195 | chr11 | NM_146443    | 73425952  | 73436350  | 73332453  | 73333392  | - | -100k | - | AS | olfactory receptor 382                       |
| 191 | UID195 | chr11 | NM_147023    | 73425952  | 73436350  | 73404992  | 73405931  | - | -50k  | - | AS | olfactory receptor 385                       |
| 192 | UID195 | chr11 | NM_207224    | 73425952  | 73436350  | 73418776  | 73419715  | - | -10k  | + | AS | olfactory receptor 386                       |
| 193 | UID195 | chr11 | NM_001126489 | 73425952  | 73436350  | 73504972  | 73530002  | - | +100k | + | AS | zinc finger protein 735                      |
| 194 | UID197 | chr11 | NM_025496    | 62783523  | 62793921  | 62767387  | 62809290  | - | -20k  | + | AS | CMT1A duplicated region transcript 4         |
| 195 | UID197 | chr11 | NM_026210    | 62783523  | 62793921  | 62695684  | 62711379  | - | -100k | + | AS | hypothetical protein LOC67510                |
| 196 | UID197 | chr11 | NM_027660    | 62783523  | 62793921  | 62877853  | 62911155  | - | +100k | + | AS | tektin 3                                     |
| 197 | UID198 | chr11 | NM_001083884 | 58284135  | 58294515  | 58195226  | 58206736  | - | -100k | + | AS | RIKEN cDNA 2210415F13 precursor              |
| 198 | UID198 | chr11 | NM_027339    | 58284135  | 58294515  | 58195226  | 58206736  | - | -100k | + | AS | RIKEN cDNA 2210415F13 precursor              |
| 199 | UID198 | chr11 | NM_027239    | 58284135  | 58294515  | 58237305  | 58242218  | - | -50k  | + | AS | hypothetical protein LOC69864                |
| 200 | UID198 | chr11 | NM_207527    | 58284135  | 58294515  | 58262343  | 58269118  | - | -50k  | - | AS | hypothetical protein LOC403200               |
| 201 | UID198 | chr11 | NM_146878    | 58284135  | 58294515  | 58271194  | 58272142  | - | -20k  | - | AS | olfactory receptor 30                        |
| 202 | UID198 | chr11 | NM_001011770 | 58284135  | 58294515  | 58305943  | 58306948  | - | +50k  | - | S  | olfactory receptor 332                       |
| 203 | UID198 | chr11 | NM_001011861 | 58284135  | 58294515  | 58317792  | 58318749  | - | +50k  | - | S  | olfactory receptor 331                       |
| 204 | UID198 | chr11 | NM_146879    | 58284135  | 58294515  | 58345231  | 58346179  | - | +100k | - | S  | olfactory receptor 330                       |
| 205 | UID198 | chr11 | NM_001011531 | 58284135  | 58294515  | 58358712  | 58359651  | - | +100k | - | S  | olfactory receptor 329                       |
| 206 | UID198 | chr11 | NM_146502    | 58284135  | 58294515  | 58367499  | 58368432  | - | +100k | - | S  | olfactory receptor 328                       |
| 207 | UID198 | chr11 | NM_001045542 | 58284135  | 58294515  | 58248753  | 58257817  | - | -50k  | + | AS | hypothetical protein LOC624860               |
| 208 | UID203 | chr11 | NM_173753    | 54223832  | 54234273  | 54281611  | 54361659  | - | +100k | + | AS | folliculin interacting protein 1             |
| 209 | UID203 | chr11 | NM_029105    | 54223832  | 54234273  | 54214074  | 54270178  | - | -10k  | + | AS | hypothetical protein LOC74847                |

|     |        |       |              |          |          |          |          |   |       |   |    |                                                 |
|-----|--------|-------|--------------|----------|----------|----------|----------|---|-------|---|----|-------------------------------------------------|
| 210 | UID203 | chr11 | NM_144823    | 54223832 | 54234273 | 54147626 | 54204962 | - | -100k | + | AS | acyl-CoA synthetase long-chain family member 6  |
| 211 | UID203 | chr11 | NM_001033597 | 54223832 | 54234273 | 54147626 | 54204962 | - | -100k | + | AS | acyl-CoA synthetase long-chain family member 6  |
| 212 | UID203 | chr11 | NM_001033598 | 54223832 | 54234273 | 54147246 | 54204962 | - | -100k | + | AS | acyl-CoA synthetase long-chain family member 6  |
| 213 | UID203 | chr11 | NM_001033599 | 54223832 | 54234273 | 54158325 | 54204962 | - | -100k | + | AS | acyl-CoA synthetase long-chain family member 6  |
| 214 | UID204 | chr11 | NM_013744    | 50860637 | 50871045 | 50765208 | 50775058 | - | -100k | - | AS | zinc finger protein 354B                        |
| 215 | UID204 | chr11 | NM_146910    | 50860637 | 50871045 | 50812442 | 50813390 | - | -50k  | + | AS | olfactory receptor 1378                         |
| 216 | UID204 | chr11 | NM_146911    | 50860637 | 50871045 | 50828125 | 50829049 | - | -50k  | + | AS | olfactory receptor 1377                         |
| 217 | UID204 | chr11 | NM_146909    | 50860637 | 50871045 | 50850396 | 50851320 | - | -20k  | + | AS | olfactory receptor 51                           |
| 218 | UID204 | chr11 | NM_010997    | 50860637 | 50871045 | 50870426 | 50871368 | - | +10k  | + | AS | olfactory receptor 54                           |
| 219 | UID204 | chr11 | NM_009329    | 50860637 | 50871045 | 50902679 | 50916222 | - | +50k  | + | AS | zinc finger protein 354A                        |
| 220 | UID204 | chr11 | NM_008936    | 50860637 | 50871045 | 50794228 | 50797055 | - | -100k | - | AS | paired like homeodomain factor 1                |
| 221 | UID205 | chr11 | NM_001163672 | 49747832 | 49757864 | 49690173 | 49729844 | - | -100k | + | AS | mitogen activated protein kinase 9 isoform      |
| 222 | UID205 | chr11 | NM_029004    | 49747832 | 49757864 | 49745257 | 49823646 | - | -5k   | + | AS | RasGEF domain family, member 1C                 |
| 223 | UID205 | chr11 | NM_016961    | 49747832 | 49757864 | 49690173 | 49729844 | - | -100k | + | AS | mitogen activated protein kinase 9 isoform      |
| 224 | UID205 | chr11 | NM_207692    | 49747832 | 49757864 | 49690173 | 49729844 | - | -100k | + | AS | mitogen activated protein kinase 9 isoform      |
| 225 | UID205 | chr11 | NM_001163671 | 49747832 | 49757864 | 49690173 | 49729844 | - | -100k | + | AS | mitogen activated protein kinase 9 isoform      |
| 226 | UID206 | chr11 | NM_001161356 | 46602189 | 46612630 | 46512382 | 46533780 | - | -100k | - | AS | T-cell immunoglobulin and mucin domain          |
| 227 | UID206 | chr11 | NM_001161355 | 46602189 | 46612630 | 46512382 | 46542253 | - | -100k | - | AS | T-cell immunoglobulin and mucin domain          |
| 228 | UID206 | chr11 | NM_178759    | 46602189 | 46612630 | 46654221 | 46687756 | - | +100k | + | AS | T-cell immunoglobulin and mucin domain          |
| 229 | UID206 | chr11 | NM_134248    | 46602189 | 46612630 | 46594599 | 46622036 | - | -10k  | + | AS | hepatitis A virus cellular receptor 1 precursor |
| 230 | UID206 | chr11 | NM_134249    | 46602189 | 46612630 | 46512382 | 46550527 | - | -100k | - | AS | T-cell immunoglobulin and mucin domain          |
| 231 | UID208 | chr11 | NM_008073    | 41720465 | 41730906 | 41755279 | 41844101 | - | +50k  | - | S  | gamma-aminobutyric acid (GABA) A receptor,      |
| 232 | UID208 | chr11 | NM_177408    | 41720465 | 41730906 | 41753617 | 41843742 | - | +50k  | - | S  | gamma-aminobutyric acid (GABA) A receptor,      |
| 233 | UID209 | chr11 | NM_009831    | 40681174 | 40691572 | 40591974 | 40598709 | - | -100k | - | AS | cyclin G1                                       |
| 234 | UID210 | chr11 | NM_026023    | 40646544 | 40657030 | 40577064 | 40583469 | - | -100k | + | AS | NudC domain containing 2                        |
| 235 | UID210 | chr11 | NM_009831    | 40646544 | 40657030 | 40591974 | 40598709 | - | -100k | - | AS | cyclin G1                                       |
| 236 | UID214 | chr11 | NM_176841    | 29224874 | 29235360 | 29273774 | 29410811 | - | +50k  | + | AS | coiled coil domain containing 88A               |
| 237 | UID215 | chr11 | NM_181577    | 28246392 | 28256833 | 28288814 | 28484296 | - | +50k  | - | S  | coiled-coil domain containing 85A               |
| 238 | UID219 | chr11 | NM_009044    | 23733755 | 23744196 | 23641728 | 23670970 | - | -100k | - | AS | reticuloendotheliosis oncogene                  |
| 239 | UID219 | chr11 | NM_172555    | 23733755 | 23744196 | 23762646 | 23795270 | - | +50k  | - | S  | poly(A) polymerase gamma                        |
| 240 | UID223 | chr11 | NM_207655    | 16587902 | 16598299 | 16652205 | 16813910 | - | +100k | + | AS | epidermal growth factor receptor isoform 1      |
| 241 | UID223 | chr11 | NM_007912    | 16587902 | 16598299 | 16652205 | 16787661 | - | +100k | + | AS | epidermal growth factor receptor isoform 2      |
| 242 | UID225 | chr11 | NM_172496    | 12038497 | 12048894 | 12136678 | 12364963 | - | +100k | - | S  | cordon-bleu protein                             |
| 243 | UID228 | chr2  | NR_027890    | 6754503  | 6764944  | 6839973  | 6845994  | + | +100k | - | AS |                                                 |
| 244 | UID232 | chr2  | NM_008859    | 11036920 | 11047361 | 11090234 | 11219079 | + | +100k | + | AS | protein kinase C, theta                         |
| 245 | UID233 | chr2  | NM_011701    | 13573292 | 13583733 | 13492163 | 13500679 | + | -100k | + | S  | vimentin                                        |
| 246 | UID233 | chr2  | NM_145838    | 13573292 | 13583733 | 13572790 | 13711274 | + | -5k   | - | AS | sialyltransferase 8 F                           |
| 247 | UID237 | chr2  | NM_001001297 | 21161384 | 21171617 | 21123477 | 21132763 | + | -50k  | + | S  | threonine synthase-like 1 isoform b             |
| 248 | UID237 | chr2  | NM_177588    | 21161384 | 21171617 | 21123477 | 21132763 | + | -50k  | + | S  | threonine synthase-like 1 isoform a             |
| 249 | UID237 | chr2  | NM_027728    | 21161384 | 21171617 | 21098484 | 21123119 | + | -100k | - | AS | enkurin                                         |
| 250 | UID239 | chr2  | NM_080462    | 23758958 | 23769399 | 23824921 | 23871388 | + | +100k | - | AS | histamine N-methyltransferase                   |
| 251 | UID240 | chr2  | NM_080462    | 23764451 | 23774892 | 23824921 | 23871388 | + | +100k | - | AS | histamine N-methyltransferase                   |
| 252 | UID241 | chr2  | NM_080462    | 23769945 | 23779785 | 23824921 | 23871388 | + | +100k | - | AS | histamine N-methyltransferase                   |

|     |        |      |               |           |           |           |           |   |       |   |    |                                                  |
|-----|--------|------|---------------|-----------|-----------|-----------|-----------|---|-------|---|----|--------------------------------------------------|
| 253 | UID242 | chr2 | NM_146622     | 36927581  | 36938022  | 36890315  | 36891269  | + | -50k  | + | S  | olfactory receptor 360                           |
| 254 | UID242 | chr2 | NM_146368     | 36927581  | 36938022  | 36906786  | 36907755  | + | -50k  | - | AS | olfactory receptor 361                           |
| 255 | UID242 | chr2 | NM_147051     | 36927581  | 36938022  | 36926703  | 36927657  | + | -5k   | - | AS | olfactory receptor 362                           |
| 256 | UID242 | chr2 | NM_146662     | 36927581  | 36938022  | 37023251  | 37024190  | + | +100k | + | AS | olfactory receptor 365                           |
| 257 | UID246 | chr2 | NM_015753     | 44755033  | 44765519  | 44805642  | 44935288  | + | +100k | - | AS | zinc finger homeobox 1b isoform 2                |
| 258 | UID249 | chr2 | NM_173030     | 54197901  | 54208342  | 54251772  | 54933130  | + | +100k | + | AS | UDP-N-acetyl-alpha-D-galactosamine:polypeptide   |
| 259 | UID252 | chr2 | NM_008426     | 55304291  | 55314732  | 55252541  | 55410911  | + | -100k | + | S  | potassium inwardly-rectifying channel, subfamily |
| 260 | UID255 | chr2 | NM_0011111030 | 58069146  | 58079544  | 58082838  | 58173144  | + | +20k  | - | AS | activin A receptor, type IC isoform 1            |
| 261 | UID255 | chr2 | NM_001033369  | 58069146  | 58079544  | 58082838  | 58140193  | + | +20k  | - | AS | activin A receptor, type IC isoform 2            |
| 262 | UID259 | chr2 | NM_153409     | 65572926  | 65583367  | 65646605  | 65824323  | + | +100k | + | AS | cysteine-serine-rich nuclear protein 3           |
| 263 | UID259 | chr2 | NM_178634     | 65572926  | 65583367  | 65646605  | 65824323  | + | +100k | + | AS | cysteine-serine-rich nuclear protein 3           |
| 264 | UID260 | chr2 | NM_172856     | 68568187  | 68578628  | 68662395  | 68912129  | + | +100k | + | AS | LAG1 homolog, ceramide synthase 6                |
| 265 | UID265 | chr2 | NM_024181     | 80049187  | 80059628  | 80116304  | 80154894  | + | +100k | + | AS | DnaJ (Hsp40) homolog, subfamily C, member 10     |
| 266 | UID265 | chr2 | NM_177256     | 80049187  | 80059628  | 80093310  | 80096195  | + | +50k  | + | AS | peroxiredoxin 5 related sequence 1 protein       |
| 267 | UID268 | chr2 | NM_146847     | 86640979  | 86651377  | 86554633  | 86555575  | + | -100k | - | AS | olfactory receptor 1090                          |
| 268 | UID268 | chr2 | NM_146366     | 86640979  | 86651377  | 86586570  | 86587539  | + | -100k | + | S  | olfactory receptor 1093                          |
| 269 | UID268 | chr2 | NM_181818     | 86640979  | 86651377  | 86606859  | 86607836  | + | -50k  | - | AS | olfactory receptor 141                           |
| 270 | UID268 | chr2 | NM_146365     | 86640979  | 86651377  | 86629592  | 86630585  | + | -20k  | + | S  | olfactory receptor 1094                          |
| 271 | UID268 | chr2 | NM_146730     | 86640979  | 86651377  | 86651608  | 86652535  | + | +20k  | - | AS | olfactory receptor 1095                          |
| 272 | UID268 | chr2 | NM_146843     | 86640979  | 86651377  | 86691064  | 86692012  | + | +100k | - | AS | olfactory receptor 1097                          |
| 273 | UID268 | chr2 | NM_146845     | 86640979  | 86651377  | 86723421  | 86724369  | + | +100k | - | AS | olfactory receptor 1098                          |
| 274 | UID269 | chr2 | NM_146294     | 88039049  | 88049493  | 87949905  | 87950856  | + | -100k | - | AS | olfactory receptor 1167                          |
| 275 | UID269 | chr2 | NM_146531     | 88039049  | 88049493  | 87985717  | 87986656  | + | -100k | + | S  | olfactory receptor 1168                          |
| 276 | UID269 | chr2 | NM_146532     | 88039049  | 88049493  | 88024918  | 88025869  | + | -20k  | - | AS | olfactory receptor 1170                          |
| 277 | UID269 | chr2 | NM_207566     | 88039049  | 88049493  | 88074947  | 88075886  | + | +50k  | - | AS | olfactory receptor 1173                          |
| 278 | UID270 | chr2 | NM_021368     | 89885795  | 89896236  | 89821976  | 89822903  | + | -100k | - | AS | olfactory receptor 1264                          |
| 279 | UID270 | chr2 | NM_020515     | 89885795  | 89896236  | 89852252  | 89853161  | + | -50k  | - | AS | olfactory receptor 140                           |
| 280 | UID270 | chr2 | NM_146474     | 89885795  | 89896236  | 89794233  | 89795154  | + | -100k | + | S  | olfactory receptor 1261                          |
| 281 | UID270 | chr2 | NM_146974     | 89885795  | 89896236  | 89803246  | 89804161  | + | -100k | + | S  | olfactory receptor 1262                          |
| 282 | UID270 | chr2 | NM_146794     | 89885795  | 89896236  | 89815770  | 89816691  | + | -100k | + | S  | olfactory receptor 1263                          |
| 283 | UID270 | chr2 | NM_146343     | 89885795  | 89896236  | 89837759  | 89838689  | + | -50k  | + | S  | olfactory receptor 1265                          |
| 284 | UID270 | chr2 | NM_146342     | 89885795  | 89896236  | 89919505  | 89920435  | + | +50k  | - | AS | olfactory receptor 1269                          |
| 285 | UID270 | chr2 | NM_010980     | 89885795  | 89896236  | 89939049  | 89939976  | + | +100k | - | AS | olfactory receptor 32                            |
| 286 | UID270 | chr2 | NM_146985     | 89885795  | 89896236  | 89949928  | 89950843  | + | +100k | - | AS | olfactory receptor 1270                          |
| 287 | UID271 | chr2 | NM_146263     | 90171336  | 90181777  | 90201501  | 90202431  | + | +50k  | + | AS | olfactory receptor 1274                          |
| 288 | UID271 | chr2 | NM_146980     | 90171336  | 90181777  | 90082485  | 90083412  | + | -100k | - | AS | olfactory receptor 1272                          |
| 289 | UID271 | chr2 | NM_146975     | 90171336  | 90181777  | 90096774  | 90097698  | + | -100k | - | AS | olfactory receptor 1273                          |
| 290 | UID271 | chr2 | NM_146265     | 90171336  | 90181777  | 90125035  | 90125965  | + | -50k  | + | S  | olfactory receptor 1506                          |
| 291 | UID271 | chr2 | NM_008982     | 90171336  | 90181777  | 90233728  | 90381486  | + | +100k | - | AS | protein tyrosine phosphatase, receptor type, J   |
| 292 | UID271 | chr2 | NM_001135657  | 90171336  | 90181777  | 90230594  | 90280013  | + | +100k | - | AS | protein tyrosine phosphatase, receptor type, J   |
| 293 | UID276 | chr2 | NM_026592     | 101279367 | 101289808 | 101361619 | 101429825 | + | +100k | - | AS | hypothetical protein LOC68170                    |
| 294 | UID277 | chr2 | NM_028260     | 105656743 | 105666975 | 105705476 | 105766397 | + | +50k  | + | AS | IMP1 inner mitochondrial membrane                |
| 295 | UID279 | chr2 | NM_026613     | 109902431 | 109912663 | 109818655 | 109846162 | + | -100k | + | S  | coiled-coil domain containing 34                 |

|     |        |      |              |           |           |           |           |   |       |   |    |                                                 |
|-----|--------|------|--------------|-----------|-----------|-----------|-----------|---|-------|---|----|-------------------------------------------------|
| 296 | UID280 | chr2 | NM_130452    | 110035030 | 110045471 | 110065921 | 110106564 | + | +50k  | - | AS | gamma-butyrobetaine dioxygenase                 |
| 297 | UID281 | chr2 | NM_001003915 | 110343277 | 110353718 | 110398136 | 110448608 | + | +100k | + | AS | solute carrier family 5 (sodium/glucose         |
| 298 | UID282 | chr2 | NM_025675    | 114185997 | 114196438 | 114207858 | 114346369 | + | +50k  | - | AS | ATP binding domain 4                            |
| 299 | UID285 | chr2 | NM_001004174 | 122332210 | 122342651 | 122329327 | 122332517 | + | -5k   | + | S  | normal mucosa of esophagus specific 1           |
| 300 | UID285 | chr2 | NM_019788    | 122332210 | 122342651 | 122429945 | 122440928 | + | +100k | + | AS | pallidin                                        |
| 301 | UID285 | chr2 | NM_025961    | 122332210 | 122342651 | 122285913 | 122302718 | + | -50k  | - | AS | L-arginine:glycine amidinotransferase precursor |
| 302 | UID285 | chr2 | NM_011774    | 122332210 | 122342651 | 122372679 | 122394104 | + | +50k  | - | AS | solute carrier family 30 (zinc transporter),    |
| 303 | UID291 | chr2 | NM_009378    | 148149069 | 148159512 | 148095911 | 148099629 | + | -100k | - | AS | thrombomodulin precursor                        |
| 304 | UID291 | chr2 | NM_010740    | 148149069 | 148159512 | 148128091 | 148134976 | + | -50k  | - | AS | CD93 antigen                                    |
| 305 | UID291 | chr2 | NM_009219    | 148149069 | 148159512 | 148086817 | 148088205 | + | -100k | + | S  | somatostatin receptor 4                         |
| 306 | UID293 | chr2 | NM_175631    | 171696111 | 171706552 | 171727540 | 171734671 | + | +50k  | - | AS | cerebellin 4 precursor                          |
| 307 | UID294 | chr2 | NM_001034900 | 150129373 | 150139814 | 150162431 | 150176504 | + | +50k  | - | AS | zinc finger protein 345                         |
| 308 | UID295 | chr2 | NM_008953    | 153776377 | 153786818 | 153699716 | 153707514 | + | -100k | + | S  | parotid secretory protein precursor             |
| 309 | UID295 | chr2 | NM_028528    | 153776377 | 153786818 | 153821787 | 153829796 | + | +50k  | + | AS | Splunc3                                         |
| 310 | UID295 | chr2 | NM_011126    | 153776377 | 153786818 | 153834320 | 153840657 | + | +100k | + | AS | palate, lung, and nasal epithelium clone        |
| 311 | UID295 | chr2 | NM_025990    | 153776377 | 153786818 | 153854048 | 153859884 | + | +100k | + | AS | RIKEN cDNA 2310021H06 precursor                 |
| 312 | UID303 | chr2 | NM_175631    | 171696111 | 171706552 | 171727540 | 171734671 | + | +50k  | - | AS | cerebellin 4 precursor                          |
| 313 | UID304 | chr2 | NM_009236    | 181668181 | 181678579 | 181599242 | 181601046 | - | -100k | - | AS | SRY-box containing gene 18                      |
| 314 | UID304 | chr2 | NM_009326    | 181668181 | 181678579 | 181609715 | 181617457 | - | -100k | + | AS | transcription elongation factor A protein 2     |
| 315 | UID304 | chr2 | NM_008665    | 181668181 | 181678579 | 181696447 | 181757174 | - | +50k  | + | AS | myelin transcription factor 1                   |
| 316 | UID304 | chr2 | NM_011012    | 181668181 | 181678579 | 181644449 | 181650378 | - | -50k  | + | AS | opioid receptor-like 1                          |
| 317 | UID304 | chr2 | NM_026446    | 181668181 | 181678579 | 181617828 | 181623330 | - | -100k | - | AS | regulator of G-protein signaling 19             |
| 318 | UID304 | chr2 | NM_199023    | 181668181 | 181678579 | 181626200 | 181627848 | - | -50k  | - | AS | hypothetical protein LOC277496                  |
| 319 | UID304 | chr2 | NM_153594    | 181668181 | 181678579 | 181767308 | 181786856 | - | +100k | + | AS | protein-L-isoaspartate (D-aspartate)            |
| 320 | UID305 | chr2 | NM_177191    | 178370657 | 178381091 | 178274703 | 178337066 | - | -100k | - | AS | synaptonemal complex protein 2                  |
| 321 | UID305 | chr2 | NM_001081289 | 178370657 | 178381091 | 178343941 | 178351569 | - | -50k  | + | AS | hypothetical protein LOC71532                   |
| 322 | UID305 | chr2 | NM_198656    | 178370657 | 178381091 | 178360014 | 178416774 | - | -20k  | + | AS | cadherin-like 26 precursor                      |
| 323 | UID305 | chr2 | NM_001085501 | 178370657 | 178381091 | 178340613 | 178343880 | - | -50k  | - | AS | protein phosphatase 1, regulatory subunit 3D    |
| 324 | UID306 | chr2 | NM_053195    | 144926715 | 144937147 | 144934051 | 145333380 | - | +10k  | + | AS | solute carrier family 24                        |
| 325 | UID308 | chr2 | NM_178382    | 140423731 | 140434129 | 140349641 | 140362910 | - | -100k | - | AS | fibronectin leucine rich transmembrane protein  |
| 326 | UID312 | chr2 | NM_028201    | 136554143 | 136564626 | 136582658 | 136761090 | - | +50k  | + | AS | hypothetical protein LOC74243 isoform 2         |
| 327 | UID312 | chr2 | NM_028834    | 136554143 | 136564626 | 136583703 | 136759834 | - | +50k  | + | AS | hypothetical protein LOC74243 isoform 1         |
| 328 | UID312 | chr2 | NM_001038641 | 136554143 | 136564626 | 136590791 | 136761219 | - | +50k  | + | AS | hypothetical protein LOC74243 isoform 1         |
| 329 | UID312 | chr2 | NM_021527    | 136554143 | 136564626 | 136565220 | 136582847 | - | +20k  | - | S  | McKusick-Kaufman syndrome protein               |
| 330 | UID312 | chr2 | NM_001141946 | 136554143 | 136564626 | 136565220 | 136582847 | - | +20k  | - | S  | McKusick-Kaufman syndrome protein               |
| 331 | UID322 | chr2 | NM_026271    | 110228876 | 110239317 | 110161763 | 110163832 | - | -100k | - | AS | fin bud initiation factor homolog precursor     |
| 332 | UID324 | chr2 | NM_001048141 | 109429182 | 109439580 | 109493274 | 109527882 | - | +100k | + | AS | brain-derived neurotrophic factor isoform 2     |
| 333 | UID324 | chr2 | NM_007540    | 109429182 | 109439580 | 109475538 | 109527882 | - | +50k  | + | AS | brain-derived neurotrophic factor isoform 1     |
| 334 | UID324 | chr2 | NM_001048142 | 109429182 | 109439580 | 109494401 | 109527882 | - | +100k | + | AS | brain-derived neurotrophic factor isoform 2     |
| 335 | UID324 | chr2 | NM_001048139 | 109429182 | 109439580 | 109476735 | 109527882 | - | +50k  | + | AS | brain-derived neurotrophic factor isoform 2     |
| 336 | UID325 | chr2 | NM_029790    | 108897617 | 108908013 | 108893138 | 109079129 | - | -5k   | - | AS | methyltransferase 5 domain containing 1         |
| 337 | UID328 | chr2 | NM_008045    | 106933914 | 106944312 | 106856979 | 106860490 | - | -100k | - | AS | follicle stimulating hormone beta precursor     |
| 338 | UID329 | chr2 | NM_008045    | 106900694 | 106911092 | 106856979 | 106860490 | - | -50k  | - | AS | follicle stimulating hormone beta precursor     |



|     |        |      |               |           |           |           |           |   |       |   |    |                                |
|-----|--------|------|---------------|-----------|-----------|-----------|-----------|---|-------|---|----|--------------------------------|
| 339 | UID330 | chr2 | NM_0011111060 | 103809041 | 103819482 | 103896639 | 103916190 | - | +100k | + | AS | CD59a antigen precursor        |
| 340 | UID330 | chr2 | NM_181858     | 103809041 | 103819482 | 103871848 | 103885796 | - | +100k | + | AS | CD59b antigen precursor        |
| 341 | UID330 | chr2 | NM_008505     | 103809041 | 103819482 | 103771125 | 103782716 | - | -50k  | + | AS | LIM domain only 2 isoform 1    |
| 342 | UID330 | chr2 | NM_020593     | 103809041 | 103819482 | 103828637 | 103855966 | - | +20k  | + | AS | F-box only protein 3 isoform 2 |
| 343 | UID330 | chr2 | NM_212433     | 103809041 | 103819482 | 103828637 | 103864076 | - | +20k  | + | AS | F-box only protein 3 isoform 1 |
| 344 | UID330 | chr2 | NM_007652     | 103809041 | 103819482 | 103896639 | 103916190 | - | +100k | + | AS | CD59a antigen precursor        |
| 345 | UID330 | chr2 | NM_001142336  | 103809041 | 103819482 | 103770395 | 103782716 | - | -50k  | + | AS | LIM domain only 2 isoform 3    |
| 346 | UID330 | chr2 | NM_001142335  | 103809041 | 103819482 | 103771125 | 103782716 | - | -50k  | + | AS | LIM domain only 2 isoform 2    |
| 347 | UID330 | chr2 | NM_001142337  | 103809041 | 103819482 | 103758833 | 103782716 | - | -100k | + | AS | LIM domain only 2 isoform 3    |
| 348 | UID339 | chr2 | NM_146985     | 90042544  | 90052985  | 89949928  | 89950843  | - | -100k | - | AS | olfactory receptor 1270        |
| 349 | UID339 | chr2 | NM_146265     | 90042544  | 90052985  | 90022405  | 90023335  | - | -50k  | - | AS | olfactory receptor 1506        |
| 350 | UID339 | chr2 | NM_146984     | 90042544  | 90052985  | 90052907  | 90053825  | - | +20k  | - | S  | olfactory receptor 142         |
| 351 | UID339 | chr2 | NM_146793     | 90042544  | 90052985  | 90066349  | 90067267  | - | +50k  | - | S  | olfactory receptor 1271        |
| 352 | UID339 | chr2 | NM_146980     | 90042544  | 90052985  | 90082485  | 90083412  | - | +50k  | - | S  | olfactory receptor 1272        |
| 353 | UID339 | chr2 | NM_146975     | 90042544  | 90052985  | 90096774  | 90097698  | - | +100k | - | S  | olfactory receptor 1273        |
| 354 | UID339 | chr2 | NM_146265     | 90042544  | 90052985  | 90125035  | 90125965  | - | +100k | + | AS | olfactory receptor 1506        |
| 355 | UID340 | chr2 | NM_146342     | 89966593  | 89977034  | 89919505  | 89920435  | - | -50k  | - | AS | olfactory receptor 1269        |
| 356 | UID340 | chr2 | NM_010980     | 89966593  | 89977034  | 89939049  | 89939976  | - | -50k  | - | AS | olfactory receptor 32          |
| 357 | UID340 | chr2 | NM_146985     | 89966593  | 89977034  | 89949928  | 89950843  | - | -20k  | - | AS | olfactory receptor 1270        |
| 358 | UID340 | chr2 | NM_146265     | 89966593  | 89977034  | 90022405  | 90023335  | - | +100k | - | S  | olfactory receptor 1506        |
| 359 | UID340 | chr2 | NM_146984     | 89966593  | 89977034  | 90052907  | 90053825  | - | +100k | - | S  | olfactory receptor 142         |
| 360 | UID340 | chr2 | NM_146793     | 89966593  | 89977034  | 90066349  | 90067267  | - | +100k | - | S  | olfactory receptor 1271        |
| 361 | UID341 | chr2 | NM_146977     | 89692920  | 89703364  | 89617166  | 89618099  | - | -100k | + | AS | olfactory receptor 1255        |
| 362 | UID341 | chr2 | NM_146983     | 89692920  | 89703364  | 89635861  | 89636782  | - | -100k | - | AS | olfactory receptor 1256        |
| 363 | UID341 | chr2 | NM_010990     | 89692920  | 89703364  | 89644904  | 89645810  | - | -50k  | - | AS | olfactory receptor 48          |
| 364 | UID341 | chr2 | NM_146982     | 89692920  | 89703364  | 89681666  | 89682596  | - | -20k  | + | AS | olfactory receptor 1257        |
| 365 | UID341 | chr2 | NM_146978     | 89692920  | 89703364  | 89730649  | 89731585  | - | +50k  | + | AS | olfactory receptor 1258        |
| 366 | UID341 | chr2 | NM_146341     | 89692920  | 89703364  | 89744022  | 89744952  | - | +100k | - | S  | olfactory receptor 1259        |
| 367 | UID341 | chr2 | NM_146981     | 89692920  | 89703364  | 89778618  | 89779551  | - | +100k | + | AS | olfactory receptor 1260        |
| 368 | UID342 | chr2 | NM_0010111517 | 88504897  | 88515338  | 88478695  | 88479652  | - | -50k  | + | AS | olfactory receptor 1193        |
| 369 | UID342 | chr2 | NM_146753     | 88504897  | 88515338  | 88483642  | 88484569  | - | -50k  | - | AS | olfactory receptor 1195        |
| 370 | UID342 | chr2 | NM_146464     | 88504897  | 88515338  | 88501221  | 88502166  | - | -5k   | - | AS | olfactory receptor 1196        |
| 371 | UID342 | chr2 | NM_001005225  | 88504897  | 88515338  | 88529491  | 88530436  | - | +50k  | - | S  | olfactory receptor 1197        |
| 372 | UID342 | chr2 | NM_207567     | 88504897  | 88515338  | 88546798  | 88547725  | - | +50k  | - | S  | olfactory receptor 1198        |
| 373 | UID342 | chr2 | NM_146458     | 88504897  | 88515338  | 88556579  | 88557512  | - | +100k | - | S  | olfactory receptor 1199        |
| 374 | UID342 | chr2 | NM_001005227  | 88504897  | 88515338  | 88568141  | 88569152  | - | +100k | - | S  | olfactory receptor 1200        |
| 375 | UID342 | chr2 | NM_146895     | 88504897  | 88515338  | 88595222  | 88596146  | - | +100k | + | AS | olfactory receptor 1201        |
| 376 | UID343 | chr2 | NM_146772     | 88463997  | 88474438  | 88392644  | 88393565  | - | -100k | + | AS | olfactory receptor 1189        |
| 377 | UID343 | chr2 | NM_0010111517 | 88463997  | 88474438  | 88478695  | 88479652  | - | +20k  | + | AS | olfactory receptor 1193        |
| 378 | UID343 | chr2 | NM_146753     | 88463997  | 88474438  | 88483642  | 88484569  | - | +20k  | - | S  | olfactory receptor 1195        |
| 379 | UID343 | chr2 | NM_146464     | 88463997  | 88474438  | 88501221  | 88502166  | - | +50k  | - | S  | olfactory receptor 1196        |
| 380 | UID343 | chr2 | NM_001005225  | 88463997  | 88474438  | 88529491  | 88530436  | - | +100k | - | S  | olfactory receptor 1197        |
| 381 | UID343 | chr2 | NM_207567     | 88463997  | 88474438  | 88546798  | 88547725  | - | +100k | - | S  | olfactory receptor 1198        |

|     |        |       |              |          |          |          |          |   |       |   |    |                                                  |
|-----|--------|-------|--------------|----------|----------|----------|----------|---|-------|---|----|--------------------------------------------------|
| 382 | UID343 | chr2  | NM_146458    | 88463997 | 88474438 | 88556579 | 88557512 | - | +100k | - | S  | olfactory receptor 1199                          |
| 383 | UID344 | chr2  | NM_001011785 | 85094053 | 85104536 | 85131805 | 85132735 | - | +50k  | - | S  | olfactory receptor 987                           |
| 384 | UID344 | chr2  | NM_001011534 | 85094053 | 85104536 | 85153833 | 85154763 | - | +100k | - | S  | olfactory receptor 988                           |
| 385 | UID345 | chr2  | NM_145526    | 84878368 | 84888851 | 84797390 | 84836673 | - | -100k | - | AS | purinergic receptor P2X3                         |
| 386 | UID345 | chr2  | NM_008920    | 84878368 | 84888851 | 84781299 | 84784471 | - | -100k | + | AS | proteoglycan 2, bone marrow precursor            |
| 387 | UID345 | chr2  | NM_016914    | 84878368 | 84888851 | 84789053 | 84794725 | - | -100k | + | AS | proteoglycan 3 precursor                         |
| 388 | UID345 | chr2  | NM_011784    | 84878368 | 84888851 | 84937198 | 84940761 | - | +100k | + | AS | apelin receptor                                  |
| 389 | UID345 | chr2  | NM_182990    | 84878368 | 84888851 | 84838039 | 84847950 | - | -50k  | + | AS | structure specific recognition protein 1 isoform |
| 390 | UID345 | chr2  | NM_001081260 | 84878368 | 84888851 | 84851298 | 84873887 | - | -50k  | + | AS | tankyrase 1 binding protein 1                    |
| 391 | UID345 | chr2  | NM_001136081 | 84878368 | 84888851 | 84838289 | 84847945 | - | -50k  | + | AS | structure specific recognition protein 1 isoform |
| 392 | UID346 | chr2  | NM_175514    | 83686760 | 83697154 | 83613566 | 83682197 | - | -100k | + | AS | family with sequence similarity 171, member B    |
| 393 | UID346 | chr2  | NM_027964    | 83686760 | 83697154 | 83715917 | 83742065 | - | +50k  | - | S  | zinc finger, SWIM domain containing 2            |
| 394 | UID353 | chr2  | NM_177843    | 77940007 | 77950405 | 78038385 | 78103069 | - | +100k | + | AS | hypothetical protein LOC329436                   |
| 395 | UID354 | chr2  | NM_001033477 | 66883411 | 66893897 | 66974672 | 66987051 | - | +100k | + | AS | hypothetical protein LOC383709                   |
| 396 | UID360 | chr2  | NM_029692    | 58499883 | 58510324 | 58570570 | 58606054 | - | +100k | + | AS | uridine phosphorylase 2                          |
| 397 | UID368 | chr2  | NM_172663    | 49296330 | 49306771 | 49273494 | 49373618 | - | -50k  | + | AS | enhancer of polycomb homolog 2                   |
| 398 | UID381 | chr2  | NM_024209    | 39061532 | 39071973 | 39018806 | 39048347 | - | -50k  | - | AS | protein phosphatase 6, catalytic subunit         |
| 399 | UID382 | chr2  | NM_146951    | 36363814 | 36374212 | 36274595 | 36275534 | - | -100k | + | AS | olfactory receptor 340                           |
| 400 | UID382 | chr2  | NM_146950    | 36363814 | 36374212 | 36301195 | 36302137 | - | -100k | - | AS | olfactory receptor 341                           |
| 401 | UID382 | chr2  | NM_146948    | 36363814 | 36374212 | 36349422 | 36350361 | - | -20k  | + | AS | olfactory receptor 342                           |
| 402 | UID382 | chr2  | NM_146628    | 36363814 | 36374212 | 36390608 | 36391538 | - | +50k  | + | AS | olfactory receptor 344                           |
| 403 | UID382 | chr2  | NM_146945    | 36363814 | 36374212 | 36462049 | 36462985 | - | +100k | + | AS | olfactory receptor 345                           |
| 404 | UID383 | chr2  | NM_146947    | 36258293 | 36268691 | 36198786 | 36199707 | - | -100k | + | AS | olfactory receptor 338                           |
| 405 | UID383 | chr2  | NM_146949    | 36258293 | 36268691 | 36243408 | 36244338 | - | -20k  | + | AS | olfactory receptor 339                           |
| 406 | UID383 | chr2  | NM_146951    | 36258293 | 36268691 | 36274595 | 36275534 | - | +20k  | + | AS | olfactory receptor 340                           |
| 407 | UID383 | chr2  | NM_146950    | 36258293 | 36268691 | 36301195 | 36302137 | - | +50k  | - | S  | olfactory receptor 341                           |
| 408 | UID383 | chr2  | NM_146948    | 36258293 | 36268691 | 36349422 | 36350361 | - | +100k | + | AS | olfactory receptor 342                           |
| 409 | UID384 | chr2  | NM_026896    | 29119327 | 29129768 | 29168844 | 29346797 | - | +50k  | + | AS | transcriptional co-activator CRSP8 homolog       |
| 410 | UID385 | chr2  | NM_148413    | 22075192 | 22085636 | 22158821 | 22469894 | - | +100k | + | AS | myosin IIIA                                      |
| 411 | UID391 | chr2  | NM_026162    | 16348513 | 16358954 | 16274075 | 16669869 | - | -100k | + | AS | plexin domain containing 2 precursor             |
| 412 | UID392 | chr2  | NM_026162    | 16291976 | 16302417 | 16274075 | 16669869 | - | -20k  | + | AS | plexin domain containing 2 precursor             |
| 413 | UID394 | chr2  | NM_008625    | 14198956 | 14209397 | 14147167 | 14249776 | - | -100k | + | AS | mannose receptor, C type 1 precursor             |
| 414 | UID395 | chr2  | NM_001012396 | 14035575 | 14046058 | 13944584 | 13973789 | - | -100k | - | AS | protein tyrosine phosphatase-like (proline       |
| 415 | UID395 | chr2  | NM_013935    | 14035575 | 14046058 | 13944584 | 13973789 | - | -100k | - | AS | protein tyrosine phosphatase-like (proline       |
| 416 | UID395 | chr2  | NM_011484    | 14035575 | 14046058 | 13991865 | 14066084 | - | -50k  | + | AS | signal transducing adaptor molecule (SH3 domain) |
| 417 | UID395 | chr2  | NM_001081310 | 14035575 | 14046058 | 14092277 | 14139747 | - | +100k | + | AS | hypothetical protein LOC625286                   |
| 418 | UID401 | chr15 | NM_199476    | 37801959 | 37812400 | 37868541 | 37905644 | + | +100k | - | AS | ribonucleotide reductase M2 B (TP53 inducible)   |
| 419 | UID405 | chr15 | NM_001081391 | 47375922 | 47386405 | 47410711 | 48622063 | + | +50k  | - | AS | CUB and Sushi multiple domains 3                 |
| 420 | UID412 | chr15 | NM_133766    | 65542630 | 65553030 | 65616713 | 65703485 | + | +100k | + | AS | RIKEN cDNA C920006C10                            |
| 421 | UID413 | chr15 | NM_133766    | 65564653 | 65575094 | 65616713 | 65703485 | + | +100k | + | AS | RIKEN cDNA C920006C10                            |
| 422 | UID416 | chr15 | NM_026817    | 89484602 | 89494999 | 89410293 | 89419690 | + | -100k | - | AS | RAB, member of RAS oncogene family-like 2A       |
| 423 | UID416 | chr15 | NM_013455    | 89484602 | 89494999 | 89396092 | 89402351 | + | -100k | + | S  | acrosin precursor                                |
| 424 | UID417 | chr15 | NM_001033441 | 90017674 | 90028114 | 90052077 | 90058321 | + | +50k  | + | AS | expressed sequence AU045404                      |

|     |        |       |              |           |           |           |           |   |       |   |    |                                                  |
|-----|--------|-------|--------------|-----------|-----------|-----------|-----------|---|-------|---|----|--------------------------------------------------|
| 425 | UID418 | chr15 | NM_001003670 | 101480729 | 101491170 | 101452061 | 101456222 | + | -50k  | - | AS | type II keratin Kb14                             |
| 426 | UID418 | chr15 | NM_010669    | 101480729 | 101491170 | 101504056 | 101508323 | + | +50k  | - | AS | keratin complex 2, basic, gene 6b                |
| 427 | UID418 | chr15 | NM_008476    | 101480729 | 101491170 | 101517961 | 101522339 | + | +50k  | - | AS | keratin 6A                                       |
| 428 | UID418 | chr15 | NM_019956    | 101480729 | 101491170 | 101561982 | 101571131 | + | +100k | - | AS | keratin 71                                       |
| 429 | UID418 | chr15 | NM_027011    | 101480729 | 101491170 | 101535103 | 101540925 | + | +100k | - | AS | keratin 5                                        |
| 430 | UID418 | chr15 | NM_133357    | 101480729 | 101491170 | 101391376 | 101401938 | + | -100k | - | AS | keratin 75                                       |
| 431 | UID418 | chr15 | NR_002869    | 101480729 | 101491170 | 101436907 | 101438513 | + | -50k  | + | S  |                                                  |
| 432 | UID418 | chr15 | NR_003960    | 101480729 | 101491170 | 101471053 | 101475414 | + | -10k  | - | AS |                                                  |
| 433 | UID418 | chr15 | NR_002868    | 101480729 | 101491170 | 101415350 | 101416606 | + | -100k | - | AS |                                                  |
| 434 | UID419 | chr15 | NM_013866    | 103237149 | 103247590 | 103141928 | 103168120 | + | -100k | - | AS | zinc finger protein 385A                         |
| 435 | UID419 | chr15 | NM_008800    | 103237149 | 103247590 | 103331331 | 103358086 | + | +100k | + | AS | phosphodiesterase 1B                             |
| 436 | UID419 | chr15 | NM_153505    | 103237149 | 103247590 | 103281858 | 103326834 | + | +50k  | + | AS | NCK associated protein 1 like                    |
| 437 | UID419 | chr15 | NM_177631    | 103237149 | 103247590 | 103266993 | 103276493 | + | +50k  | - | AS | hypothetical protein LOC223927                   |
| 438 | UID419 | chr15 | NM_010577    | 103237149 | 103247590 | 103172322 | 103194782 | + | -100k | - | AS | integrin alpha 5 preproprotein                   |
| 439 | UID419 | chr15 | NM_028797    | 103237149 | 103247590 | 103230494 | 103258461 | + | -10k  | - | AS | gametocyte specific factor 1                     |
| 440 | UID421 | chr15 | NM_177431    | 94122605  | 94132999  | 94098342  | 94232438  | - | -50k  | - | AS | a disintegrin-like and metalloprotease with      |
| 441 | UID423 | chr15 | NM_177820    | 77324726  | 77335152  | 77411412  | 77423380  | - | +100k | - | S  | apolipoprotein L 10b                             |
| 442 | UID423 | chr15 | NM_001024848 | 77324726  | 77335152  | 77249463  | 77274715  | - | -100k | - | AS | apolipoprotein L 7b                              |
| 443 | UID423 | chr15 | NM_177744    | 77324726  | 77335152  | 77304301  | 77318324  | - | -50k  | + | AS | apolipoprotein L 10a                             |
| 444 | UID423 | chr15 | NM_175391    | 77324726  | 77335152  | 77352121  | 77360570  | - | +50k  | - | S  | apolipoprotein L 7c                              |
| 445 | UID423 | chr15 | NM_001162883 | 77324726  | 77335152  | 77231044  | 77238335  | - | -100k | - | AS | apolipoprotein L 9a                              |
| 446 | UID423 | chr15 | NM_173786    | 77324726  | 77335152  | 77231044  | 77238289  | - | -100k | - | AS | apolipoprotein L 9a                              |
| 447 | UID424 | chr15 | NM_027668    | 59887578  | 59897976  | 59844546  | 59846299  | - | -50k  | - | AS | hypothetical protein LOC71088                    |
| 448 | UID425 | chr15 | NM_008764    | 54033784  | 54044225  | 54080701  | 54108567  | - | +50k  | - | S  | tumor necrosis factor receptor superfamily,      |
| 449 | UID431 | chr15 | NM_001085421 | 33682447  | 33692888  | 33628463  | 33632472  | - | -100k | - | AS | testis-specific protein, Y-encoded-like 5        |
| 450 | UID436 | chr15 | NM_177355    | 4362922   | 4373363   | 4325490   | 4525579   | - | -50k  | + | AS | phosphatidylinositol-specific phospholipase C, X |
| 451 | UID437 | chr1  | NM_010342    | 5807250   | 5817691   | 5903788   | 5907479   | + | +100k | - | AS | G protein-coupled receptor 7                     |
| 452 | UID441 | chr1  | NM_175642    | 25061569  | 25072007  | 25012021  | 25774253  | + | -50k  | - | AS | brain-specific angiogenesis inhibitor 3          |
| 453 | UID449 | chr1  | NM_144953    | 52881512  | 52891953  | 52869671  | 52897385  | + | -20k  | - | AS | hypothetical protein LOC67080                    |
| 454 | UID449 | chr1  | NM_146108    | 52881512  | 52891953  | 52789590  | 52865405  | + | -100k | + | S  | 3-hydroxyisobutyryl-Coenzyme A hydrolase         |
| 455 | UID450 | chr1  | NM_001033194 | 54328823  | 54339264  | 54342125  | 54383516  | + | +20k  | - | AS | general transcription factor IIIC, polypeptide   |
| 456 | UID450 | chr1  | NM_001163314 | 54328823  | 54339264  | 54425250  | 54502227  | + | +100k | - | AS | GPI deacylase                                    |
| 457 | UID451 | chr1  | NM_007642    | 60629144  | 60639587  | 60690933  | 60717905  | + | +100k | + | AS | CD28 antigen precursor                           |
| 458 | UID453 | chr1  | NM_001081050 | 61602207  | 61612605  | 61573099  | 62576560  | + | -50k  | + | S  | par-3 partitioning defective 3 homolog B         |
| 459 | UID458 | chr1  | NM_175210    | 71180548  | 71190985  | 71176297  | 71348118  | + | -5k   | - | AS | ATP-binding cassette, sub-family A (ABC1),       |
| 460 | UID459 | chr1  | NM_009129    | 79256909  | 79267350  | 79313692  | 79319114  | + | +100k | - | AS | secretogranin II precursor                       |
| 461 | UID462 | chr1  | NM_152915    | 84327845  | 84338243  | 84248863  | 84575246  | + | -100k | - | AS | delta/notch-like EGF-related receptor precursor  |
| 462 | UID466 | chr1  | NM_029349    | 107392524 | 107402965 | 107491407 | 107582678 | + | +100k | + | AS | hypothetical protein LOC227446 isoform 2         |
| 463 | UID466 | chr1  | NM_013784    | 107392524 | 107402965 | 107348686 | 107491223 | + | -50k  | - | AS | phosphatidylinositol glycan anchor biosynthesis, |
| 464 | UID466 | chr1  | NM_173187    | 107392524 | 107402965 | 107491407 | 107582678 | + | +100k | + | AS | hypothetical protein LOC227446 isoform 1         |
| 465 | UID470 | chr1  | NM_019933    | 121568923 | 121579364 | 121485638 | 121664617 | + | -100k | - | AS | protein tyrosine phosphatase, non-receptor type  |
| 466 | UID473 | chr1  | NM_177243    | 133505111 | 133515552 | 133571567 | 133597951 | + | +100k | + | AS | solute carrier family 26, member 9               |
| 467 | UID473 | chr1  | NM_145509    | 133505111 | 133515552 | 133516240 | 133541010 | + | +20k  | + | AS | RAB7B, member RAS oncogene family                |

|     |        |       |              |           |           |           |           |   |       |   |    |                                                  |
|-----|--------|-------|--------------|-----------|-----------|-----------|-----------|---|-------|---|----|--------------------------------------------------|
| 468 | UID473 | chr1  | NM_007799    | 133505111 | 133515552 | 133465859 | 133503053 | + | -50k  | + | S  | cathepsin E preproprotein                        |
| 469 | UID473 | chr1  | NM_011924    | 133505111 | 133515552 | 133426659 | 133439546 | + | -100k | + | S  | arginine vasopressin receptor 1B                 |
| 470 | UID475 | chr1  | NM_001159866 | 145621532 | 145631973 | 145539495 | 145569684 | + | -100k | + | S  | ubiquitin carboxyl-terminal hydrolase L5 isoform |
| 471 | UID475 | chr1  | NM_019562    | 145621532 | 145631973 | 145539495 | 145569684 | + | -100k | + | S  | ubiquitin carboxyl-terminal hydrolase L5 isoform |
| 472 | UID476 | chr1  | NM_009061    | 145824468 | 145834869 | 145761555 | 145766367 | + | -100k | - | AS | regulator of G-protein signaling 2               |
| 473 | UID476 | chr1  | NM_153171    | 145824468 | 145834869 | 145900884 | 145939590 | + | +100k | - | AS | regulator of G-protein signaling 13              |
| 474 | UID477 | chr1  | NM_022881    | 146566112 | 146576510 | 146515058 | 146537639 | + | -100k | - | AS | regulator of G-protein signaling 18              |
| 475 | UID478 | chr1  | NM_153539    | 148204686 | 148215081 | 148257883 | 148664690 | + | +100k | + | AS | family with sequence similarity 5, member C      |
| 476 | UID478 | chr1  | NM_001145807 | 148204686 | 148215081 | 148259904 | 148664690 | + | +100k | + | AS | family with sequence similarity 5, member C      |
| 477 | UID482 | chr1  | NM_024458    | 151992226 | 152002666 | 152081634 | 152096123 | + | +100k | + | AS | phosducin                                        |
| 478 | UID482 | chr1  | NM_001159730 | 151992226 | 152002666 | 152081634 | 152096123 | + | +100k | + | AS | phosducin                                        |
| 479 | UID487 | chr1  | NM_010778    | 196749422 | 196759820 | 196742623 | 196792972 | - | -10k  | - | AS | CD46 antigen, complement regulatory protein      |
| 480 | UID487 | chr1  | NM_007758    | 196749422 | 196759820 | 196837534 | 196877439 | - | +100k | - | S  | complement receptor 2                            |
| 481 | UID487 | chr1  | NM_013499    | 196749422 | 196759820 | 196804511 | 196832294 | - | +100k | - | S  | complement receptor related protein              |
| 482 | UID488 | chr1  | NM_146106    | 187803943 | 187814384 | 187788519 | 187818098 | - | -20k  | - | AS | lysophospholipase-like 1                         |
| 483 | UID494 | chr1  | NM_001029977 | 141459541 | 141469941 | 141514329 | 141597650 | - | +100k | - | S  | complement factor H-related protein C isoform 1  |
| 484 | UID494 | chr1  | NM_015780    | 141459541 | 141469941 | 141363474 | 141376633 | - | -100k | - | AS | complement factor H-related 1                    |
| 485 | UID494 | chr1  | NM_001160303 | 141459541 | 141469941 | 141514329 | 141597650 | - | +100k | - | S  | complement factor H-related protein C isoform 2  |
| 486 | UID494 | chr1  | NM_001160304 | 141459541 | 141469941 | 141514329 | 141597650 | - | +100k | - | S  | complement factor H-related protein C isoform 3  |
| 487 | UID498 | chr1  | NM_027971    | 108675396 | 108685837 | 108761995 | 108784625 | - | +100k | + | AS | serine (or cysteine) proteinase inhibitor, clade |
| 488 | UID498 | chr1  | NM_009257    | 108675396 | 108685837 | 108688726 | 108710895 | - | +20k  | + | AS | serine (or cysteine) proteinase inhibitor, clade |
| 489 | UID498 | chr1  | NM_009190    | 108675396 | 108685837 | 108598334 | 108624272 | - | -100k | - | AS | vacuolar protein sorting 4b                      |
| 490 | UID506 | chr1  | NM_172422    | 63763229  | 63773627  | 63664900  | 63687661  | - | -100k | + | AS | FAST kinase domains 2                            |
| 491 | UID509 | chr1  | NM_001077406 | 62604615  | 62615056  | 62637592  | 62731367  | - | +50k  | + | AS | neuropilin 2 isoform 5 precursor                 |
| 492 | UID509 | chr1  | NM_001077404 | 62604615  | 62615056  | 62637592  | 62752968  | - | +50k  | + | AS | neuropilin 2 isoform 2 precursor                 |
| 493 | UID509 | chr1  | NM_001077405 | 62604615  | 62615056  | 62637592  | 62752968  | - | +50k  | + | AS | neuropilin 2 isoform 4 precursor                 |
| 494 | UID509 | chr1  | NM_010939    | 62604615  | 62615056  | 62637592  | 62752968  | - | +50k  | + | AS | neuropilin 2 isoform 3 precursor                 |
| 495 | UID509 | chr1  | NM_001077407 | 62604615  | 62615056  | 62637592  | 62731367  | - | +50k  | + | AS | neuropilin 2 isoform 6 precursor                 |
| 496 | UID509 | chr1  | NM_001077403 | 62604615  | 62615056  | 62637592  | 62752968  | - | +50k  | + | AS | neuropilin 2 isoform 1 precursor                 |
| 497 | UID512 | chr1  | NM_144953    | 52831261  | 52841697  | 52869671  | 52897385  | - | +50k  | - | S  | hypothetical protein LOC67080                    |
| 498 | UID512 | chr1  | NM_146108    | 52831261  | 52841697  | 52789590  | 52865405  | - | -50k  | + | AS | 3-hydroxyisobutyryl-Coenzyme A hydrolase         |
| 499 | UID512 | chr1  | NM_008384    | 52831261  | 52841697  | 52733964  | 52762233  | - | -100k | - | AS | inositol polyphosphate-1-phosphatase             |
| 500 | UID520 | chr1  | NM_001025305 | 19109931  | 19120329  | 19197267  | 19223948  | - | +100k | + | AS | transcription factor AP-2 beta isoform 2         |
| 501 | UID520 | chr1  | NM_009334    | 19109931  | 19120329  | 19194127  | 19223948  | - | +100k | + | AS | transcription factor AP-2 beta isoform 1         |
| 502 | UID520 | chr1  | NM_153154    | 19109931  | 19120329  | 19088235  | 19151546  | - | -50k  | + | AS | transcription factor AP-2, delta                 |
| 503 | UID522 | chr1  | NM_009352    | 15720779  | 15731177  | 15790871  | 15828643  | - | +100k | + | AS | telomeric repeat binding factor 1                |
| 504 | UID523 | chr19 | NM_026640    | 12566893  | 12577334  | 12640569  | 12656741  | + | +100k | + | AS | hypothetical protein LOC107373                   |
| 505 | UID523 | chr19 | NM_146683    | 12566893  | 12577334  | 12489355  | 12490312  | + | -100k | + | S  | olfactory receptor 1441                          |
| 506 | UID523 | chr19 | NM_019540    | 12566893  | 12577334  | 12494949  | 12499155  | + | -100k | + | S  | pore forming protein-like                        |
| 507 | UID523 | chr19 | NM_010821    | 12566893  | 12577334  | 12527823  | 12532330  | + | -50k  | + | S  | macrophage expressed gene 1                      |
| 508 | UID523 | chr19 | NM_172442    | 12566893  | 12577334  | 12533380  | 12569041  | + | -50k  | - | AS | deltex 4 homolog                                 |
| 509 | UID524 | chr19 | NM_146345    | 13834768  | 13845209  | 13771847  | 13772807  | + | -100k | + | S  | olfactory receptor 1491                          |
| 510 | UID524 | chr19 | NM_146990    | 13834768  | 13845209  | 13816126  | 13817074  | + | -20k  | + | S  | olfactory receptor 1494                          |

|     |        |       |              |          |          |          |          |   |       |   |    |                                                 |
|-----|--------|-------|--------------|----------|----------|----------|----------|---|-------|---|----|-------------------------------------------------|
| 511 | UID524 | chr19 | NM_146344    | 13834768 | 13845209 | 13835362 | 13836322 | + | +5k   | + | AS | olfactory receptor 1495                         |
| 512 | UID524 | chr19 | NM_146989    | 13834768 | 13845209 | 13847632 | 13848586 | + | +20k  | + | AS | olfactory receptor 1496                         |
| 513 | UID524 | chr19 | NM_146741    | 13834768 | 13845209 | 13861683 | 13862628 | + | +50k  | - | AS | olfactory receptor 1497                         |
| 514 | UID524 | chr19 | NM_146796    | 13834768 | 13845209 | 13881662 | 13882607 | + | +50k  | - | AS | olfactory receptor 1499                         |
| 515 | UID524 | chr19 | NM_001011831 | 13834768 | 13845209 | 13894477 | 13895413 | + | +100k | - | AS | olfactory receptor 1500                         |
| 516 | UID524 | chr19 | NM_146633    | 13834768 | 13845209 | 13905242 | 13906190 | + | +100k | - | AS | olfactory receptor 1501                         |
| 517 | UID524 | chr19 | NM_146797    | 13834768 | 13845209 | 13928813 | 13929764 | + | +100k | + | AS | olfactory receptor 1502                         |
| 518 | UID525 | chr19 | NM_146796    | 13963910 | 13974351 | 13881662 | 13882607 | + | -100k | - | AS | olfactory receptor 1499                         |
| 519 | UID525 | chr19 | NM_001011831 | 13963910 | 13974351 | 13894477 | 13895413 | + | -100k | - | AS | olfactory receptor 1500                         |
| 520 | UID525 | chr19 | NM_146633    | 13963910 | 13974351 | 13905242 | 13906190 | + | -100k | - | AS | olfactory receptor 1501                         |
| 521 | UID525 | chr19 | NM_146797    | 13963910 | 13974351 | 13928813 | 13929764 | + | -50k  | + | S  | olfactory receptor 1502                         |
| 522 | UID525 | chr19 | NM_146634    | 13963910 | 13974351 | 13954279 | 13955227 | + | -10k  | - | AS | olfactory receptor 1504                         |
| 523 | UID525 | chr19 | NM_001011850 | 13963910 | 13974351 | 13986040 | 13986991 | + | +50k  | + | AS | olfactory receptor 1505                         |
| 524 | UID526 | chr19 | NM_001011850 | 14064026 | 14074258 | 13986040 | 13986991 | + | -100k | + | S  | olfactory receptor 1505                         |
| 525 | UID529 | chr19 | NM_009551    | 21282478 | 21292918 | 21339374 | 21349386 | + | +100k | + | AS | zinc finger, AN1-type domain 5                  |
| 526 | UID530 | chr19 | NM_009551    | 21301487 | 21311973 | 21339374 | 21349386 | + | +50k  | + | AS | zinc finger, AN1-type domain 5                  |
| 527 | UID534 | chr19 | NM_016861    | 40197212 | 40207647 | 40275549 | 40324927 | + | +100k | - | AS | carboxyl terminal LIM domain protein 1          |
| 528 | UID534 | chr19 | NM_145499    | 40197212 | 40207647 | 40206671 | 40240582 | + | +10k  | - | AS | cytochrome P450, family 2, subfamily c,         |
| 529 | UID534 | chr19 | NM_134144    | 40197212 | 40207647 | 40143006 | 40167262 | + | -100k | + | S  | cytochrome P450, family 2, subfamily c,         |
| 530 | UID539 | chr19 | NM_001033172 | 59867731 | 59878130 | 59958358 | 59998027 | - | +100k | - | S  | Rab11-family interacting protein 2 isoform 1    |
| 531 | UID541 | chr19 | NM_025696    | 48278105 | 48288544 | 48259335 | 48858816 | - | -20k  | + | AS | sortilin-related VPS10 domain containing        |
| 532 | UID543 | chr19 | NM_146097    | 24893139 | 24903537 | 24987523 | 25028655 | - | +100k | - | S  | COBW domain containing 1                        |
| 533 | UID543 | chr19 | NM_008022    | 24893139 | 24903537 | 24966061 | 24968406 | - | +100k | - | S  | forkhead box D4                                 |
| 534 | UID544 | chr19 | NM_001035244 | 22710364 | 22720762 | 22759715 | 22993586 | - | +50k  | + | AS | transient receptor potential cation channel,    |
| 535 | UID544 | chr19 | NM_001035246 | 22710364 | 22720762 | 22759715 | 22836477 | - | +50k  | + | AS | transient receptor potential cation channel,    |
| 536 | UID544 | chr19 | NM_001035245 | 22710364 | 22720762 | 22759715 | 22839476 | - | +50k  | + | AS | transient receptor potential cation channel,    |
| 537 | UID545 | chr19 | NM_028953    | 20815020 | 20825461 | 20850554 | 21021299 | - | +50k  | - | S  | transmembrane channel-like gene family 1        |
| 538 | UID545 | chr19 | NM_011921    | 20815020 | 20825461 | 20760049 | 20794653 | - | -100k | - | AS | aldehyde dehydrogenase family 1, subfamily A7   |
| 539 | UID547 | chr19 | NM_025731    | 7740731  | 7751130  | 7679613  | 7706283  | - | -100k | + | AS | HRAS-like suppressor family, member 5           |
| 540 | UID547 | chr19 | NM_019516    | 7740731  | 7751130  | 7663705  | 7674221  | - | -100k | - | AS | lectin, galactose binding, soluble 12           |
| 541 | UID547 | chr19 | NM_144785    | 7740731  | 7751130  | 7740120  | 7778298  | - | -5k   | - | AS | solute carrier family 22 (organic anion         |
| 542 | UID549 | chr13 | NM_172445    | 8805838  | 8816222  | 8802213  | 8870288  | + | -5k   | - | AS | WD repeat domain 37 isoform a                   |
| 543 | UID549 | chr13 | NM_001039388 | 8805838  | 8816222  | 8802213  | 8870976  | + | -5k   | - | AS | WD repeat domain 37 isoform a                   |
| 544 | UID549 | chr13 | NM_001039389 | 8805838  | 8816222  | 8849724  | 8870288  | + | +50k  | - | AS | WD repeat domain 37 isoform b                   |
| 545 | UID549 | chr13 | NM_177960    | 8805838  | 8816222  | 8885219  | 8891614  | + | +100k | + | AS | isopentenyl-diphosphate delta isomerase isoform |
| 546 | UID549 | chr13 | NM_145360    | 8805838  | 8816222  | 8885230  | 8891616  | + | +100k | + | AS | isopentenyl-diphosphate delta isomerase isoform |
| 547 | UID550 | chr13 | NM_134244    | 22427901 | 22438342 | 22335375 | 22336272 | + | -100k | + | S  | vomeronasal 1 receptor, H21                     |
| 548 | UID550 | chr13 | NM_134220    | 22427901 | 22438342 | 22361810 | 22362713 | + | -100k | + | S  | vomeronasal 1 receptor, I3                      |
| 549 | UID550 | chr13 | NM_134213    | 22427901 | 22438342 | 22390002 | 22391106 | + | -50k  | + | S  | vomeronasal 1 receptor, H4                      |
| 550 | UID550 | chr13 | NM_134212    | 22427901 | 22438342 | 22402493 | 22403432 | + | -50k  | + | S  | vomeronasal 1 receptor, H3                      |
| 551 | UID550 | chr13 | NM_134221    | 22427901 | 22438342 | 22482082 | 22482985 | + | +100k | + | AS | vomeronasal 1 receptor, I4                      |
| 552 | UID550 | chr13 | NM_134224    | 22427901 | 22438342 | 22508801 | 22509710 | + | +100k | - | AS | vomeronasal 1 receptor, I7                      |
| 553 | UID551 | chr13 | NM_175663    | 24032958 | 24043399 | 23941237 | 23941621 | + | -100k | - | AS | histone cluster 1, H2ba                         |

|     |        |       |              |          |          |          |          |   |       |   |    |                                                  |
|-----|--------|-------|--------------|----------|----------|----------|----------|---|-------|---|----|--------------------------------------------------|
| 554 | UID551 | chr13 | NM_175658    | 24032958 | 24043399 | 23941926 | 23942316 | + | -100k | + | S  | histone cluster 1, H2aa                          |
| 555 | UID551 | chr13 | NM_145399    | 24032958 | 24043399 | 23960921 | 23998679 | + | -100k | - | AS | secretagogin, EF-hand calcium binding protein    |
| 556 | UID551 | chr13 | NM_026825    | 24032958 | 24043399 | 24019948 | 24288255 | + | -20k  | - | AS | leucine rich repeat containing 16A               |
| 557 | UID556 | chr13 | NM_011455    | 33477008 | 33487449 | 33492254 | 33503463 | + | +20k  | + | AS | serine (or cysteine) proteinase inhibitor, clade |
| 558 | UID558 | chr13 | NM_001122948 | 40634228 | 40644626 | 40726648 | 40741417 | + | +100k | - | AS | transcription factor AP-2, alpha isoform b       |
| 559 | UID558 | chr13 | NM_011547    | 40634228 | 40644626 | 40726648 | 40744797 | + | +100k | - | AS | transcription factor AP-2, alpha isoform a       |
| 560 | UID559 | chr13 | NM_031166    | 48306418 | 48316859 | 48273363 | 48275973 | + | -50k  | + | S  | inhibitor of DNA binding 4                       |
| 561 | UID561 | chr13 | NM_008957    | 63443664 | 63454105 | 63520754 | 63574742 | + | +100k | - | AS | patched                                          |
| 562 | UID565 | chr13 | NM_026173    | 97457507 | 97467896 | 97488992 | 97516286 | - | +50k  | + | AS | proteome of centriole 5                          |
| 563 | UID565 | chr13 | NM_001042714 | 97457507 | 97467896 | 97516832 | 97571859 | - | +100k | - | S  | ankyrin repeat and death domain containing 1B    |
| 564 | UID571 | chr13 | NM_183197    | 33424882 | 33435323 | 33331541 | 33342831 | - | -100k | + | AS | serine (or cysteine) proteinase inhibitor, clade |
| 565 | UID571 | chr13 | NM_011455    | 33424882 | 33435323 | 33492254 | 33503463 | - | +100k | + | AS | serine (or cysteine) proteinase inhibitor, clade |
| 566 | UID572 | chr13 | NM_144536    | 29255505 | 29265949 | 29332770 | 29863053 | - | +100k | - | S  | CDK5 regulatory subunit associated protein       |
| 567 | UID577 | chr13 | NM_134221    | 22549637 | 22560035 | 22482082 | 22482985 | - | -100k | + | AS | vomer nasal 1 receptor, I4                       |
| 568 | UID577 | chr13 | NM_134224    | 22549637 | 22560035 | 22508801 | 22509710 | - | -50k  | - | AS | vomer nasal 1 receptor, I7                       |
| 569 | UID577 | chr13 | NM_134236    | 22549637 | 22560035 | 22531515 | 22532451 | - | -20k  | + | AS | vomer nasal 1 receptor, H11                      |
| 570 | UID577 | chr13 | NM_134217    | 22549637 | 22560035 | 22599444 | 22600395 | - | +50k  | - | S  | vomer nasal 1 receptor, H8                       |
| 571 | UID577 | chr13 | NM_134216    | 22549637 | 22560035 | 22627561 | 22628500 | - | +100k | - | S  | vomer nasal 1 receptor, H7                       |
| 572 | UID577 | chr13 | NM_001045544 | 22549637 | 22560035 | 22563665 | 22564574 | - | +20k  | + | AS | vomer nasal receptor-like                        |
| 573 | UID578 | chr13 | NM_145846    | 22211378 | 22221864 | 22151985 | 22152990 | - | -100k | - | AS | vomer nasal 1 receptor, I8                       |
| 574 | UID578 | chr13 | NM_145845    | 22211378 | 22221864 | 22194610 | 22195513 | - | -20k  | - | AS | vomer nasal 1 receptor, I1                       |
| 575 | UID578 | chr13 | NM_134225    | 22211378 | 22221864 | 22226325 | 22227285 | - | +20k  | - | S  | vomer nasal 1 receptor, I9                       |
| 576 | UID578 | chr13 | NM_134223    | 22211378 | 22221864 | 22285826 | 22286777 | - | +100k | + | AS | vomer nasal 1 receptor, I6                       |
| 577 | UID578 | chr13 | NM_001080972 | 22211378 | 22221864 | 22251679 | 22252570 | - | +50k  | + | AS | vomer nasal 1 receptor-like                      |
| 578 | UID583 | chrX  | NM_001085537 | 8543202  | 8553688  | 8507557  | 8508096  | + | -50k  | + | S  | novel protein similar to histone H2a             |
| 579 | UID583 | chrX  | NM_007807    | 8543202  | 8553688  | 8592210  | 8626283  | + | +50k  | - | AS | cytochrome b-245, beta polypeptide               |
| 580 | UID584 | chrX  | NM_019634    | 9678816  | 9689257  | 9642074  | 9753563  | + | -50k  | + | S  | tetraspanin 7                                    |
| 581 | UID586 | chrX  | NM_001034100 | 13345061 | 13355544 | 13368106 | 13368616 | + | +50k  | + | AS | hypothetical protein LOC385328                   |
| 582 | UID594 | chrX  | NM_001081666 | 23128866 | 23139264 | 23114660 | 23115893 | + | -20k  | - | AS | hypothetical protein LOC245376                   |
| 583 | UID594 | chrX  | NM_001034864 | 23128866 | 23139264 | 23049721 | 23064509 | + | -100k | + | S  | Tes-like protein                                 |
| 584 | UID595 | chrX  | NM_001100446 | 23675106 | 23685547 | 23709208 | 23731854 | + | +50k  | - | AS | hypothetical protein LOC100043216                |
| 585 | UID595 | chrX  | NM_001100444 | 23675106 | 23685547 | 23631266 | 23657719 | + | -50k  | - | AS | hypothetical protein LOC546272                   |
| 586 | UID598 | chrX  | NM_001009947 | 32251489 | 32261930 | 32320276 | 32508007 | + | +100k | + | AS | dedicator of cytokinesis 11                      |
| 587 | UID599 | chrX  | NM_001009947 | 32289440 | 32300838 | 32320276 | 32508007 | + | +50k  | + | AS | dedicator of cytokinesis 11                      |
| 588 | UID600 | chrX  | NM_023894    | 34151561 | 34162002 | 34143723 | 34146397 | + | -10k  | - | AS | reproductive homeobox on X chromosome, 9         |
| 589 | UID600 | chrX  | NM_001025086 | 34151561 | 34162002 | 34076312 | 34085798 | + | -100k | + | S  | reproductive homeobox 7                          |
| 590 | UID600 | chrX  | NM_008955    | 34151561 | 34162002 | 34071681 | 34074484 | + | -100k | + | S  | reproductive homeobox on X chromosome, 6         |
| 591 | UID600 | chrX  | NM_001004193 | 34151561 | 34162002 | 34119402 | 34123571 | + | -50k  | - | AS | reproductive homeobox on X chromosome, 8         |
| 592 | UID605 | chrX  | NM_001033422 | 37985916 | 37996356 | 38039620 | 38156528 | + | +100k | - | AS | THO complex subunit 2                            |
| 593 | UID606 | chrX  | NM_011855    | 38874332 | 38884773 | 38777019 | 39519413 | + | -100k | - | AS | odd Oz/ten-m homolog 1                           |
| 594 | UID610 | chrX  | NM_175539    | 40628796 | 40639194 | 40610083 | 40612964 | + | -20k  | - | AS | WD repeat domain 40C                             |
| 595 | UID612 | chrX  | NM_028514    | 42514326 | 42524724 | 42573633 | 42574972 | + | +100k | + | AS | actin-related protein T1                         |
| 596 | UID615 | chrX  | NM_053123    | 44031125 | 44041559 | 44053996 | 44137146 | + | +50k  | - | AS | SWI/SNF related, matrix associated, actin        |

|     |        |      |              |           |           |           |           |   |       |   |    |                                                 |
|-----|--------|------|--------------|-----------|-----------|-----------|-----------|---|-------|---|----|-------------------------------------------------|
| 597 | UID616 | chrX | NM_053123    | 44108861  | 44119302  | 44053996  | 44137146  | + | -100k | - | AS | SWI/SNF related, matrix associated, actin       |
| 598 | UID616 | chrX | NM_177215    | 44108861  | 44119302  | 44157082  | 44210493  | + | +50k  | + | AS | phosphatidylinositol polyphosphate              |
| 599 | UID619 | chrX | NM_146390    | 46325619  | 46336102  | 46253932  | 46254862  | + | -100k | - | AS | olfactory receptor 1323                         |
| 600 | UID622 | chrX | NM_015819    | 47678305  | 47688703  | 47631838  | 47925104  | + | -50k  | - | AS | heparan sulfate 6-O-sulfotransferase 2 isoform  |
| 601 | UID622 | chrX | NM_001077202 | 47678305  | 47688703  | 47631838  | 47926229  | + | -50k  | - | AS | heparan sulfate 6-O-sulfotransferase 2 isoform  |
| 602 | UID623 | chrX | NM_031388    | 47970946  | 47983679  | 47998585  | 48042380  | + | +50k  | - | AS | ubiquitin specific peptidase 26                 |
| 603 | UID624 | chrX | NM_027510    | 52425594  | 52435990  | 52483355  | 52500280  | + | +100k | + | AS | Xlr-like                                        |
| 604 | UID625 | chrX | NM_001033360 | 53887439  | 53897837  | 53843451  | 53850501  | + | -50k  | - | AS | G protein-coupled receptor 101                  |
| 605 | UID633 | chrX | NM_027512    | 60383449  | 60393890  | 60434226  | 60439443  | + | +100k | + | AS | hypothetical protein LOC70696                   |
| 606 | UID637 | chrX | NM_001161431 | 62866501  | 62876899  | 62909982  | 62922066  | + | +50k  | + | AS | SLIT and NTRK-like family, member 2 precursor   |
| 607 | UID637 | chrX | NM_198863    | 62866501  | 62876899  | 62913823  | 62922066  | + | +50k  | + | AS | SLIT and NTRK-like family, member 2 precursor   |
| 608 | UID641 | chrX | NM_010498    | 66522155  | 66532553  | 66603734  | 66625640  | + | +100k | - | AS | iduronate-2-sulfatase isoform a                 |
| 609 | UID641 | chrX | NM_001038991 | 66522155  | 66532553  | 66603734  | 66625640  | + | +100k | - | AS | iduronate-2-sulfatase isoform b                 |
| 610 | UID641 | chrX | NM_001038990 | 66522155  | 66532553  | 66603734  | 66625640  | + | +100k | - | AS | iduronate-2-sulfatase isoform b                 |
| 611 | UID642 | chrX | NM_020280    | 68393346  | 68403784  | 68474736  | 68475683  | + | +100k | + | AS | melanoma antigen family A, 4                    |
| 612 | UID644 | chrX | NM_001081670 | 71115017  | 71125500  | 71089915  | 71096075  | + | -50k  | + | S  | hypothetical protein LOC546325                  |
| 613 | UID645 | chrX | NM_181584    | 71182549  | 71192991  | 71241269  | 71337625  | + | +100k | - | AS | growth factor receptor bound protein            |
| 614 | UID645 | chrX | NM_001081670 | 71182549  | 71192991  | 71089915  | 71096075  | + | -100k | + | S  | hypothetical protein LOC546325                  |
| 615 | UID646 | chrX | NM_026126    | 71553429  | 71563870  | 71635141  | 71648836  | + | +100k | + | AS | FUN14 domain containing 2                       |
| 616 | UID647 | chrX | NM_001013760 | 72486155  | 72496601  | 72517024  | 72520392  | + | +50k  | + | AS | hypothetical protein LOC238829                  |
| 617 | UID648 | chrX | NM_001013760 | 72612631  | 72623069  | 72517024  | 72520392  | + | -100k | + | S  | hypothetical protein LOC238829                  |
| 618 | UID648 | chrX | NM_001033799 | 72612631  | 72623069  | 72646068  | 72650698  | + | +50k  | + | AS | hypothetical protein LOC619294                  |
| 619 | UID658 | chrX | NM_173435    | 77662868  | 77673266  | 77672293  | 77710841  | + | +10k  | - | AS | hypothetical protein LOC245492                  |
| 620 | UID661 | chrX | NM_001160403 | 83071903  | 83082300  | 82999961  | 84368342  | + | -100k | - | AS | interleukin 1 receptor accessory protein-like 1 |
| 621 | UID663 | chrX | NM_008821    | 85671989  | 85682387  | 85656566  | 85662408  | + | -20k  | - | AS | plasmacytoma expressed transcript 2             |
| 622 | UID664 | chrX | NM_008821    | 85738006  | 85748447  | 85656566  | 85662408  | + | -100k | - | AS | plasmacytoma expressed transcript 2             |
| 623 | UID668 | chrX | NM_029590    | 91943877  | 91954275  | 91935308  | 91935980  | + | -10k  | - | AS | hypothetical protein LOC76386                   |
| 624 | UID668 | chrX | NM_001034907 | 91943877  | 91954275  | 91914396  | 92130689  | + | -50k  | + | S  | zinc finger CCCH-type containing 12B            |
| 625 | UID670 | chrX | NM_001159627 | 92578862  | 92589303  | 92659064  | 92777201  | + | +100k | + | AS | hephaestin isoform 1                            |
| 626 | UID670 | chrX | NM_010417    | 92578862  | 92589303  | 92658154  | 92777201  | + | +100k | + | AS | hephaestin isoform 1                            |
| 627 | UID670 | chrX | NM_172931    | 92578862  | 92589303  | 92509585  | 92559959  | + | -100k | - | AS | hypothetical protein LOC245525                  |
| 628 | UID670 | chrX | NM_181273    | 92578862  | 92589303  | 92659064  | 92734142  | + | +100k | + | AS | hephaestin isoform 2                            |
| 629 | UID670 | chrX | NM_001159628 | 92578862  | 92589303  | 92658154  | 92777201  | + | +100k | + | AS | hephaestin isoform 3                            |
| 630 | UID676 | chrX | NM_173021    | 98760622  | 98771020  | 98716693  | 98846965  | + | -50k  | - | AS | phosphorylase kinase alpha 1 isoform 2          |
| 631 | UID676 | chrX | NM_008832    | 98760622  | 98771020  | 98716693  | 98846965  | + | -50k  | - | AS | phosphorylase kinase alpha 1 isoform 1          |
| 632 | UID677 | chrX | NM_001077354 | 100367420 | 100377861 | 100280154 | 100403836 | + | -100k | - | AS | hypothetical protein LOC245555                  |
| 633 | UID678 | chrX | NM_175358    | 100822324 | 100832765 | 100741268 | 100873522 | + | -100k | - | AS | zinc finger, DHHC domain containing 15          |
| 634 | UID679 | chrX | NM_175358    | 100838663 | 100849097 | 100741268 | 100873522 | + | -100k | - | AS | zinc finger, DHHC domain containing 15          |
| 635 | UID680 | chrX | NM_053206    | 100997922 | 101008363 | 101057670 | 101059986 | + | +100k | - | AS | melanoma antigen, family E, 2                   |
| 636 | UID682 | chrX | NM_026312    | 101219972 | 101230463 | 101282493 | 101287905 | + | +100k | + | AS | hypothetical protein LOC67683                   |
| 637 | UID683 | chrX | NM_009530    | 101936168 | 101946609 | 102000335 | 102132091 | + | +100k | - | AS | alpha thalassemia/mental retardation syndrome   |
| 638 | UID683 | chrX | NM_030614    | 101936168 | 101946609 | 101967195 | 101979251 | + | +50k  | + | AS | fibroblast growth factor 16                     |
| 639 | UID684 | chrX | NM_009530    | 101939900 | 101950299 | 102000335 | 102132091 | + | +100k | - | AS | alpha thalassemia/mental retardation syndrome   |

|     |        |      |              |           |           |           |           |   |       |   |    |                                                |
|-----|--------|------|--------------|-----------|-----------|-----------|-----------|---|-------|---|----|------------------------------------------------|
| 640 | UID684 | chrX | NM_030614    | 101939900 | 101950299 | 101967195 | 101979251 | + | +50k  | + | AS | fibroblast growth factor 16                    |
| 641 | UID685 | chrX | NM_001033251 | 103529933 | 103540374 | 103458746 | 103498026 | + | -100k | + | S  | G protein-coupled receptor 174                 |
| 642 | UID685 | chrX | NM_008409    | 103529933 | 103540374 | 103599913 | 103606079 | + | +100k | - | AS | integral membrane protein 2A                   |
| 643 | UID689 | chrX | NM_033605    | 109465788 | 109477995 | 109415199 | 109953330 | + | -100k | + | S  | dachshund 2 isoform 2                          |
| 644 | UID689 | chrX | NM_001142570 | 109465788 | 109477995 | 109415199 | 109952035 | + | -100k | + | S  | dachshund 2 isoform 1                          |
| 645 | UID691 | chrX | NM_001081661 | 111115236 | 111125677 | 111024525 | 111025454 | + | -100k | + | S  | hypothetical protein LOC75097                  |
| 646 | UID691 | chrX | NR_003645    | 111115236 | 111125677 | 111021955 | 111022885 | + | -100k | + | S  |                                                |
| 647 | UID692 | chrX | NM_001102665 | 113203371 | 113213854 | 113131700 | 113132048 | + | -100k | + | S  | predicted gene 14920                           |
| 648 | UID694 | chrX | NM_001081385 | 116499515 | 116509953 | 116407270 | 117023394 | + | -100k | + | S  | protocadherin 11 X-linked                      |
| 649 | UID700 | chrX | NM_001111144 | 122286109 | 122296504 | 122373175 | 122375212 | + | +100k | - | AS | hypothetical protein LOC214308                 |
| 650 | UID700 | chrX | NM_177705    | 122286109 | 122296504 | 122280056 | 122283460 | + | -10k  | - | AS | Myb-like DNA-binding domain containing protein |
| 651 | UID703 | chrX | NM_031259    | 130235289 | 130245688 | 130290894 | 130311118 | + | +100k | - | AS | nuclear RNA export factor 2                    |
| 652 | UID703 | chrX | NM_175446    | 130235289 | 130245688 | 130317736 | 130355573 | + | +100k | - | AS | zinc finger, matrin type 1                     |
| 653 | UID703 | chrX | NM_026139    | 130235289 | 130245688 | 130150510 | 130155358 | + | -100k | - | AS | armadillo repeat containing, X-linked 2        |
| 654 | UID704 | chrX | NM_031390    | 130737689 | 130748979 | 130648675 | 130659000 | + | -100k | + | S  | preferentially expressed antigen in            |
| 655 | UID704 | chrX | NM_183320    | 130737689 | 130748979 | 130719647 | 130729757 | + | -20k  | + | S  | hypothetical protein LOC331529                 |
| 656 | UID704 | chrX | NM_183320    | 130737689 | 130748979 | 130780198 | 130790361 | + | +50k  | + | AS | hypothetical protein LOC331529                 |
| 657 | UID704 | chrX | NM_177918    | 130798287 | 130809578 | 130840951 | 130850958 | + | +50k  | + | AS | hypothetical protein LOC331531                 |
| 658 | UID704 | chrX | NM_001099321 | 130798287 | 130809578 | 130840951 | 130850958 | + | +50k  | + | AS | hypothetical protein LOC100040635              |
| 659 | UID704 | chrX | NM_183320    | 130798287 | 130809578 | 130719647 | 130729757 | + | -100k | + | S  | hypothetical protein LOC331529                 |
| 660 | UID704 | chrX | NM_183320    | 130798287 | 130809578 | 130780198 | 130790361 | + | -20k  | + | S  | hypothetical protein LOC331529                 |
| 661 | UID705 | chrX | NM_177918    | 130798288 | 130809578 | 130840951 | 130850958 | + | +50k  | + | AS | hypothetical protein LOC331531                 |
| 662 | UID705 | chrX | NM_001099321 | 130798288 | 130809578 | 130840951 | 130850958 | + | +50k  | + | AS | hypothetical protein LOC100040635              |
| 663 | UID705 | chrX | NM_183320    | 130798288 | 130809578 | 130719647 | 130729757 | + | -100k | + | S  | hypothetical protein LOC331529                 |
| 664 | UID705 | chrX | NM_183320    | 130798288 | 130809578 | 130780198 | 130790361 | + | -20k  | + | S  | hypothetical protein LOC331529                 |
| 665 | UID705 | chrX | NM_031390    | 130737690 | 130748979 | 130648675 | 130659000 | + | -100k | + | S  | preferentially expressed antigen in            |
| 666 | UID705 | chrX | NM_183320    | 130737690 | 130748979 | 130719647 | 130729757 | + | -20k  | + | S  | hypothetical protein LOC331529                 |
| 667 | UID705 | chrX | NM_183320    | 130737690 | 130748979 | 130780198 | 130790361 | + | +50k  | + | AS | hypothetical protein LOC331529                 |
| 668 | UID707 | chrX | NM_011635    | 134726288 | 134736729 | 134680046 | 134684529 | + | -50k  | + | S  | tumor rejection antigen P1A                    |
| 669 | UID708 | chrX | NM_019496    | 138106027 | 138116468 | 138099841 | 138213096 | + | -10k  | - | AS | AMMECR1 protein                                |
| 670 | UID711 | chrX | NM_008824    | 145867580 | 145878021 | 145930636 | 145984576 | + | +100k | + | AS | 6-phosphofructo-2-kinase/fructose-2,           |
| 671 | UID711 | chrX | NM_029943    | 145867580 | 145878021 | 145912222 | 145928865 | + | +50k  | - | AS | apurinic/aprimidinic endonuclease 2            |
| 672 | UID711 | chrX | NM_001102446 | 145867580 | 145878021 | 145888132 | 145911338 | + | +50k  | + | AS | 5-aminolevulinate synthase 2 isoform b         |
| 673 | UID711 | chrX | NM_009653    | 145867580 | 145878021 | 145888132 | 145911338 | + | +50k  | + | AS | 5-aminolevulinate synthase 2 isoform a         |
| 674 | UID713 | chrX | NM_177201    | 146839563 | 146849961 | 146861387 | 146966549 | + | +50k  | + | AS | PHD finger protein 8 isoform a                 |
| 675 | UID713 | chrX | NM_001113354 | 146839563 | 146849961 | 146861387 | 146974573 | + | +50k  | + | AS | PHD finger protein 8 isoform b                 |
| 676 | UID714 | chrX | NM_021523    | 147081291 | 147091734 | 147143997 | 147276133 | + | +100k | + | AS | HECT, UBA and WWE domain containing 1          |
| 677 | UID715 | chrX | NM_027543    | 147777164 | 147787562 | 147685361 | 147708827 | + | -100k | - | AS | G-protein coupled receptor 173                 |
| 678 | UID715 | chrX | NM_029836    | 147777164 | 147787562 | 147677567 | 147683200 | + | -100k | - | AS | nucleolar TGF-beta1 target protein             |
| 679 | UID716 | chrX | NM_172441    | 147861759 | 147872200 | 147950224 | 148110177 | + | +100k | - | AS | shroom family member 2                         |
| 680 | UID717 | chrX | NM_029199    | 149838496 | 149848729 | 149822717 | 149825398 | + | -20k  | + | S  | hypothetical protein LOC75185                  |
| 681 | UID717 | chrX | NM_001037167 | 149838496 | 149848729 | 149915943 | 149920046 | + | +100k | - | AS | hypothetical protein LOC434881                 |
| 682 | UID726 | chrX | NM_009031    | 158010254 | 158020652 | 158104476 | 158123195 | + | +100k | + | AS | retinoblastoma binding protein 7               |



|     |        |      |              |           |           |           |           |   |       |   |    |                                                  |
|-----|--------|------|--------------|-----------|-----------|-----------|-----------|---|-------|---|----|--------------------------------------------------|
| 683 | UID728 | chrX | NM_183427    | 160429873 | 160440314 | 160473121 | 160671086 | + | +50k  | - | AS | glycine receptor, alpha 2 subunit precursor      |
| 684 | UID729 | chrX | NM_133211    | 162554890 | 162565331 | 162649035 | 162674633 | + | +100k | - | AS | toll-like receptor 7 precursor                   |
| 685 | UID729 | chrX | NM_021278    | 162554890 | 162565331 | 162551198 | 162553323 | + | -5k   | - | AS | thymosin, beta 4, X chromosome                   |
| 686 | UID729 | chrX | NM_133212    | 162554890 | 162565331 | 162586836 | 162607893 | + | +50k  | - | AS | toll-like receptor 8 precursor                   |
| 687 | UID730 | chrX | NM_001081978 | 164501103 | 164511543 | 164520218 | 164531314 | + | +20k  | - | AS | amelogenin X chromosome isoform 1                |
| 688 | UID730 | chrX | NM_009666    | 164501103 | 164511543 | 164524125 | 164531314 | + | +50k  | - | AS | amelogenin X chromosome isoform 2                |
| 689 | UID731 | chrX | NM_008222    | 164626521 | 164638971 | 164655634 | 164664448 | + | +50k  | - | AS | holocytochrome c synthase                        |
| 690 | UID732 | chrX | NM_008222    | 164752956 | 164763391 | 164655634 | 164664448 | + | -100k | - | AS | holocytochrome c synthase                        |
| 691 | UID733 | chrX | NM_010797    | 165081605 | 165092046 | 165029351 | 165334902 | + | -100k | + | S  | midline 1                                        |
| 692 | UID733 | chrX | NR_003635    | 165081605 | 165092046 | 165120482 | 165123740 | + | +50k  | - | AS |                                                  |
| 693 | UID734 | chrX | NM_027027    | 159905773 | 159916214 | 159842007 | 159883857 | - | -100k | + | AS | ankyrin repeat and SOCS box-containing 9         |
| 694 | UID735 | chrX | NM_010216    | 159694299 | 159704740 | 159717652 | 159746752 | - | +50k  | + | AS | c-fos induced growth factor precursor            |
| 695 | UID735 | chrX | NM_026853    | 159694299 | 159704740 | 159782205 | 159803205 | - | +100k | + | AS | ankyrin repeat and SOCS box-containing 11        |
| 696 | UID735 | chrX | NM_011081    | 159694299 | 159704740 | 159763891 | 159778020 | - | +100k | + | AS | phosphatidylinositol glycan, class A             |
| 697 | UID735 | chrX | NM_027153    | 159694299 | 159704740 | 159613541 | 159717010 | - | -100k | + | AS | pirin                                            |
| 698 | UID736 | chrX | NM_198409    | 157049270 | 157059668 | 157061657 | 157123599 | - | +20k  | + | AS | retinoic acid induced 2                          |
| 699 | UID736 | chrX | NM_001103367 | 157049270 | 157059668 | 157061140 | 157123599 | - | +20k  | + | AS | retinoic acid induced 2                          |
| 700 | UID739 | chrX | NM_011147    | 155996464 | 156006905 | 155967199 | 156064077 | - | -50k  | - | AS | protein phosphatase with EF hand calcium-binding |
| 701 | UID740 | chrX | NM_172783    | 155877732 | 155888131 | 155846794 | 155935827 | - | -50k  | + | AS | phosphorylase kinase alpha 2                     |
| 702 | UID740 | chrX | NM_011147    | 155877732 | 155888131 | 155967199 | 156064077 | - | +100k | - | S  | protein phosphatase with EF hand calcium-binding |
| 703 | UID742 | chrX | NM_001081667 | 153106281 | 153116722 | 153162539 | 153164474 | - | +100k | + | AS | kelch-like 34                                    |
| 704 | UID742 | chrX | NM_177751    | 153106281 | 153116722 | 153165677 | 153387215 | - | +100k | - | S  | connector enhancer of kinase suppressor of Ras   |
| 705 | UID742 | chrX | NM_025357    | 153106281 | 153116722 | 153043222 | 153096694 | - | -100k | + | AS | small muscle protein, X-linked                   |
| 706 | UID745 | chrX | NM_001081671 | 150561023 | 150571464 | 150465696 | 150488565 | - | -100k | - | AS | hypothetical protein LOC73347                    |
| 707 | UID745 | chrX | NM_019736    | 150561023 | 150571464 | 150603215 | 150638223 | - | +50k  | + | AS | acyl-CoA thioesterase 9                          |
| 708 | UID745 | chrX | NM_009121    | 150561023 | 150571464 | 150553854 | 150557125 | - | -10k  | - | AS | diamine N-acetyltransferase 1                    |
| 709 | UID746 | chrX | NM_030700    | 146201329 | 146211689 | 146147136 | 146154998 | - | -100k | - | AS | melanoma antigen family D, 2                     |
| 710 | UID746 | chrX | NR_003597    | 146201329 | 146211689 | 146168404 | 146197658 | - | -50k  | + | AS |                                                  |
| 711 | UID747 | chrX | NM_019548    | 145954100 | 145964498 | 145986018 | 145998152 | - | +50k  | - | S  | trophinin isoform 3                              |
| 712 | UID747 | chrX | NM_008824    | 145954100 | 145964498 | 145930636 | 145984576 | - | -50k  | + | AS | 6-phosphofructo-2-kinase/fructose-2,             |
| 713 | UID747 | chrX | NM_029943    | 145954100 | 145964498 | 145912222 | 145928865 | - | -50k  | - | AS | apurinic/aprimidinic endonuclease 2              |
| 714 | UID747 | chrX | NM_001102446 | 145954100 | 145964498 | 145888132 | 145911338 | - | -100k | + | AS | 5-aminolevulinate synthase 2 isoform b           |
| 715 | UID747 | chrX | NM_009653    | 145954100 | 145964498 | 145888132 | 145911338 | - | -100k | + | AS | 5-aminolevulinate synthase 2 isoform a           |
| 716 | UID747 | chrX | NM_001002272 | 145954100 | 145964498 | 145986018 | 145998152 | - | +50k  | - | S  | trophinin isoform 1                              |
| 717 | UID748 | chrX | NM_178358    | 140479341 | 140489741 | 140536726 | 140595262 | - | +100k | - | S  | lipoma HMGIC fusion partner-like 1 precursor     |
| 718 | UID749 | chrX | NM_026247    | 139467596 | 139478038 | 139564390 | 139571556 | - | +100k | + | AS | glycosyltransferase 28 domain containing 1       |
| 719 | UID750 | chrX | NM_031258    | 138501851 | 138512294 | 138543525 | 138640630 | - | +50k  | - | S  | chordin-like 1 2                                 |
| 720 | UID750 | chrX | NM_001114385 | 138501851 | 138512294 | 138532041 | 138640630 | - | +50k  | - | S  | chordin-like 1 1                                 |
| 721 | UID751 | chrX | NM_177592    | 137954205 | 137964646 | 137927785 | 138084606 | - | -50k  | + | AS | transmembrane protein 164                        |
| 722 | UID753 | chrX | NM_010572    | 136986733 | 136997174 | 136957365 | 136971585 | - | -50k  | - | AS | insulin receptor substrate 4                     |
| 723 | UID754 | chrX | NM_001163155 | 136806493 | 136816936 | 136721786 | 136935603 | - | -100k | + | AS | collagen, type IV, alpha 5                       |
| 724 | UID754 | chrX | NM_007736    | 136806493 | 136816936 | 136721786 | 136935603 | - | -100k | + | AS | collagen, type IV, alpha 5                       |
| 725 | UID755 | chrX | NM_013757    | 129220484 | 129230882 | 129282734 | 129328133 | - | +100k | - | S  | synaptotagmin-like 4                             |

|     |        |      |               |           |           |           |           |   |       |   |    |                                                 |
|-----|--------|------|---------------|-----------|-----------|-----------|-----------|---|-------|---|----|-------------------------------------------------|
| 726 | UID755 | chrX | NM_001083895  | 129220484 | 129230882 | 129254775 | 129278800 | - | +50k  | + | AS | sushi-repeat containing protein precursor       |
| 727 | UID755 | chrX | NM_026838     | 129220484 | 129230882 | 129254775 | 129278800 | - | +50k  | + | AS | sushi-repeat containing protein precursor       |
| 728 | UID755 | chrX | NM_019656     | 129220484 | 129230882 | 129237419 | 129244779 | - | +20k  | - | S  | tetraspanin 6                                   |
| 729 | UID755 | chrX | NM_022322     | 129220484 | 129230882 | 129197357 | 129211927 | - | -50k  | + | AS | tenomodulin                                     |
| 730 | UID765 | chrX | NM_001033241  | 122591316 | 122601757 | 122507566 | 122531581 | - | -100k | + | AS | hypothetical protein LOC211208                  |
| 731 | UID774 | chrX | NM_031382     | 108260980 | 108271463 | 108210463 | 108244270 | - | -100k | + | AS | testis expressed gene 16                        |
| 732 | UID779 | chrX | NM_145224     | 103932616 | 103943014 | 103870682 | 103891694 | - | -100k | + | AS | T-box 22 isoform 1                              |
| 733 | UID779 | chrX | NM_025921     | 103932616 | 103943014 | 103985472 | 104019053 | - | +100k | - | S  | hypothetical protein LOC67028                   |
| 734 | UID779 | chrX | NM_181319     | 103932616 | 103943014 | 103881681 | 103891696 | - | -100k | + | AS | T-box 22 isoform 2                              |
| 735 | UID779 | chrX | NM_001163104  | 103932616 | 103943014 | 104019290 | 104075628 | - | +100k | + | AS | hypothetical protein LOC213449                  |
| 736 | UID780 | chrX | NM_001122595  | 103252805 | 103263246 | 103352172 | 103376380 | - | +100k | + | AS | purinergic receptor P2Y G-protein coupled       |
| 737 | UID780 | chrX | NM_001122596  | 103252805 | 103263246 | 103351645 | 103376380 | - | +100k | + | AS | purinergic receptor P2Y G-protein coupled       |
| 738 | UID780 | chrX | NM_172435     | 103252805 | 103263246 | 103292053 | 103307689 | - | +50k  | + | AS | purinergic receptor P2Y, G-protein coupled 10   |
| 739 | UID780 | chrX | NM_175442     | 103252805 | 103263246 | 103352333 | 103376380 | - | +100k | + | AS | purinergic receptor P2Y G-protein coupled       |
| 740 | UID781 | chrX | NM_172435     | 103249186 | 103259584 | 103292053 | 103307689 | - | +50k  | + | AS | purinergic receptor P2Y, G-protein coupled 10   |
| 741 | UID782 | chrX | NM_009592     | 100468286 | 100478684 | 100483283 | 100616565 | - | +20k  | - | S  | ATP-binding cassette, sub-family B (MDR/TAP),   |
| 742 | UID783 | chrX | NM_031384     | 97060755  | 97071196  | 97041382  | 97262356  | - | -20k  | - | AS | testis expressed gene 11                        |
| 743 | UID783 | chrX | NM_016747     | 97060755  | 97071196  | 96970465  | 97021127  | - | -100k | + | AS | synapse-associated protein 102                  |
| 744 | UID784 | chrX | NM_031384     | 96960751  | 96971195  | 97041382  | 97262356  | - | +100k | - | S  | testis expressed gene 11                        |
| 745 | UID784 | chrX | NM_023608     | 96960751  | 96971195  | 96932565  | 96941618  | - | -50k  | + | AS | osteoblast differentiation promoting factor     |
| 746 | UID784 | chrX | NM_016747     | 96960751  | 96971195  | 96970465  | 97021127  | - | +10k  | + | AS | synapse-associated protein 102                  |
| 747 | UID789 | chrX | NM_001003916  | 91895002  | 91905443  | 91841915  | 91861151  | - | -100k | - | AS | zinc finger, C4H2 domain containing             |
| 748 | UID789 | chrX | NM_029590     | 91895002  | 91905443  | 91935308  | 91935980  | - | +50k  | - | S  | hypothetical protein LOC76386                   |
| 749 | UID789 | chrX | NM_001034907  | 91895002  | 91905443  | 91914396  | 92130689  | - | +20k  | + | AS | zinc finger CCCH-type containing 12B            |
| 750 | UID790 | chrX | NM_080858     | 91614141  | 91624539  | 91672917  | 91680848  | - | +100k | - | S  | ankyrin repeat and SOCS box-containing 12       |
| 751 | UID790 | chrX | NM_175179     | 91614141  | 91624539  | 91623032  | 91647559  | - | +10k  | - | S  | RIKEN cDNA 2810002O09                           |
| 752 | UID793 | chrX | NM_0011101450 | 87090743  | 87101184  | 87144860  | 87145851  | - | +100k | + | AS | hypothetical protein LOC212952                  |
| 753 | UID800 | chrX | NM_001033492  | 82469542  | 82479941  | 82502974  | 82508938  | - | +50k  | - | S  | hypothetical protein LOC434903                  |
| 754 | UID800 | chrX | NM_007430     | 82469542  | 82479941  | 82444493  | 82448663  | - | -50k  | + | AS | nuclear receptor subfamily 0, group B, member 1 |
| 755 | UID807 | chrX | NM_001113734  | 75963409  | 75973850  | 75875949  | 75888301  | - | -100k | - | AS | melanoma antigen family B, 16                   |
| 756 | UID807 | chrX | NM_028025     | 75963409  | 75973850  | 75875949  | 75924154  | - | -100k | - | AS | melanoma antigen family B, 16                   |
| 757 | UID809 | chrX | NM_008621     | 71446004  | 71456445  | 71362452  | 71383669  | - | -100k | - | AS | membrane protein, palmitoylated                 |
| 758 | UID809 | chrX | NM_001030307  | 71446004  | 71456445  | 71348635  | 71362490  | - | -100k | + | AS | dyskerin                                        |
| 759 | UID809 | chrX | NM_001161373  | 71446004  | 71456445  | 71425438  | 71632761  | - | -50k  | - | AS | coagulation factor VIII isoform 2               |
| 760 | UID809 | chrX | NM_001161374  | 71446004  | 71456445  | 71425438  | 71632761  | - | -50k  | - | AS | coagulation factor VIII isoform 3               |
| 761 | UID809 | chrX | NM_007977     | 71446004  | 71456445  | 71425438  | 71632761  | - | -50k  | - | AS | coagulation factor VIII isoform 1               |
| 762 | UID809 | chrX | NM_001033786  | 71446004  | 71456445  | 71398776  | 71416471  | - | -50k  | - | AS | hypothetical protein LOC434800 precursor        |
| 763 | UID810 | chrX | NM_001099302  | 70867532  | 70877973  | 70891838  | 70898355  | - | +50k  | - | S  | hypothetical protein LOC434797                  |
| 764 | UID810 | chrX | NM_146398     | 70867532  | 70877973  | 70847047  | 70847995  | - | -50k  | + | AS | olfactory receptor 1325                         |
| 765 | UID811 | chrX | NM_021365     | 69551720  | 69562203  | 69467084  | 69475173  | - | -100k | + | AS | X-linked lymphocyte-regulated 4B                |
| 766 | UID811 | chrX | NM_007978     | 69551720  | 69562203  | 69481025  | 69483515  | - | -100k | + | AS | factor 8-associated gene A                      |
| 767 | UID811 | chrX | NM_183094     | 69551720  | 69562203  | 69486795  | 69495850  | - | -100k | - | AS | X-linked lymphocyte-regulated 4C                |
| 768 | UID811 | chrX | NM_011727     | 69551720  | 69562203  | 69507259  | 69518110  | - | -50k  | - | AS | X-linked lymphocyte-regulated 3C                |

|     |        |      |              |          |          |          |          |   |       |   |    |                                                  |
|-----|--------|------|--------------|----------|----------|----------|----------|---|-------|---|----|--------------------------------------------------|
| 769 | UID811 | chrX | NM_031493    | 69551720 | 69562203 | 69537916 | 69543235 | - | -20k  | - | AS | X-linked lymphocyte-regulated 5C                 |
| 770 | UID811 | chrX | NM_031494    | 69551720 | 69562203 | 69595339 | 69611799 | - | +50k  | + | AS | Zinc finger protein 275 isoform 1                |
| 771 | UID811 | chrX | NM_001160229 | 69551720 | 69562203 | 69595340 | 69611799 | - | +50k  | + | AS | Zinc finger protein 275 isoform 2                |
| 772 | UID812 | chrX | NM_009549    | 69183886 | 69194269 | 69240058 | 69284263 | - | +100k | + | AS | zinc finger protein 185 isoform a                |
| 773 | UID812 | chrX | NM_001109043 | 69183886 | 69194269 | 69240058 | 69284263 | - | +100k | + | AS | zinc finger protein 185 isoform b                |
| 774 | UID812 | chrX | NM_019405    | 69183886 | 69194269 | 69166284 | 69171064 | - | -20k  | - | AS | centrin 2                                        |
| 775 | UID812 | chrX | NM_010941    | 69183886 | 69194269 | 69171240 | 69211248 | - | -20k  | + | AS | NAD(P) dependent steroid dehydrogenase-like      |
| 776 | UID812 | chrX | NM_181855    | 69183886 | 69194269 | 69122086 | 69122818 | - | -100k | + | AS | melanoma antigen family A, 9                     |
| 777 | UID816 | chrX | NM_007724    | 68331045 | 68341443 | 68244594 | 68262938 | - | -100k | + | AS | cyclic nucleotide gated channel alpha 2          |
| 778 | UID837 | chrX | NM_028375    | 49852137 | 49862578 | 49802548 | 49803761 | - | -50k  | + | AS | CAAX box 1 homolog C                             |
| 779 | UID837 | chrX | NM_001018063 | 49852137 | 49862578 | 49863803 | 49865035 | - | +20k  | - | S  | CAAX box 1 homolog B                             |
| 780 | UID837 | chrX | NM_029142    | 49852137 | 49862578 | 49919457 | 49932849 | - | +100k | + | AS | hypothetical protein LOC75013                    |
| 781 | UID837 | chrX | NM_024170    | 49852137 | 49862578 | 49837117 | 49838390 | - | -20k  | - | AS | mammalian retrotransposon derived 8b             |
| 782 | UID839 | chrX | NM_207240    | 45851717 | 45862158 | 45928130 | 45929090 | - | +100k | + | AS | olfactory receptor 1320                          |
| 783 | UID840 | chrX | NM_001081123 | 45804763 | 45815204 | 45715076 | 45744877 | - | -100k | + | AS | hypothetical protein LOC75404                    |
| 784 | UID841 | chrX | NM_181751    | 44999254 | 45009694 | 44912605 | 44919105 | - | -100k | - | AS | G-protein coupled receptor 119                   |
| 785 | UID841 | chrX | NM_173376    | 44999254 | 45009694 | 44939630 | 44955346 | - | -100k | + | AS | RNA binding motif protein, X-linked 2            |
| 786 | UID841 | chrX | NM_001085499 | 44999254 | 45009694 | 45086092 | 45122340 | - | +100k | - | S  | hypothetical protein LOC209005                   |
| 787 | UID842 | chrX | NM_181751    | 44942595 | 44953036 | 44912605 | 44919105 | - | -50k  | - | AS | G-protein coupled receptor 119                   |
| 788 | UID842 | chrX | NM_011398    | 44942595 | 44953036 | 44868204 | 44906921 | - | -100k | + | AS | solute carrier family 25 (mitochondrial carrier) |
| 789 | UID842 | chrX | NM_173376    | 44942595 | 44953036 | 44939630 | 44955346 | - | -5k   | + | AS | RNA binding motif protein, X-linked 2            |
| 790 | UID846 | chrX | NM_011364    | 38810394 | 38820835 | 38747234 | 38766702 | - | -100k | + | AS | SH2 domain protein 1A                            |
| 791 | UID846 | chrX | NM_011855    | 38810394 | 38820835 | 38777019 | 39519413 | - | -50k  | - | AS | odd Oz/ten-m homolog 1                           |
| 792 | UID847 | chrX | NM_009688    | 38232653 | 38243094 | 38312462 | 38354291 | - | +100k | + | AS | baculoviral IAP repeat-containing 4              |
| 793 | UID848 | chrX | NM_001033422 | 38014257 | 38024697 | 38039620 | 38156528 | - | +50k  | - | S  | THO complex subunit 2                            |
| 794 | UID849 | chrX | NM_016886    | 37548703 | 37559144 | 37645930 | 37923228 | - | +100k | + | AS | glutamate receptor, ionotropic, AMPA3 precursor  |
| 795 | UID854 | chrX | NM_029707    | 21668758 | 21679155 | 21618590 | 21619357 | - | -100k | + | AS | hypothetical protein LOC76705                    |
| 796 | UID855 | chrX | NM_029707    | 21656263 | 21666661 | 21618590 | 21619357 | - | -50k  | + | AS | hypothetical protein LOC76705                    |
| 797 | UID856 | chrX | NM_007429    | 20559183 | 20569627 | 20641584 | 20645790 | - | +100k | + | AS | angiotensin II receptor, type 2                  |
| 798 | UID856 | chrX | NM_198633    | 20559183 | 20569627 | 20517823 | 20521581 | - | -50k  | + | AS | hypothetical protein LOC331392                   |
| 799 | UID861 | chrX | NM_175228    | 17517318 | 17527801 | 17575385 | 17618233 | - | +100k | - | S  | hypothetical protein LOC75905 precursor          |
| 800 | UID864 | chrX | NM_019634    | 9559001  | 9569487  | 9642074  | 9753563  | - | +100k | + | AS | tetraspanin 7                                    |
| 801 | UID865 | chrX | NM_001085517 | 8659076  | 8669512  | 8728918  | 8729350  | - | +100k | - | S  | hypothetical protein LOC333452                   |
| 802 | UID865 | chrX | NM_007807    | 8659076  | 8669512  | 8592210  | 8626283  | - | -100k | - | AS | cytochrome b-245, beta polypeptide               |
| 803 | UID866 | chrX | NM_001085537 | 8583236  | 8593634  | 8507557  | 8508096  | - | -100k | + | AS | novel protein similar to histone H2a             |
| 804 | UID866 | chrX | NM_007807    | 8583236  | 8593634  | 8592210  | 8626283  | - | +10k  | - | S  | cytochrome b-245, beta polypeptide               |
| 805 | UID869 | chr4 | NM_145711    | 6573715  | 6584156  | 6614532  | 6917870  | + | +50k  | - | AS | thymocyte selection-associated high mobility     |
| 806 | UID870 | chr4 | NM_007592    | 8115690  | 8126131  | 8068639  | 8166188  | + | -50k  | - | AS | carbonic anhydrase-like                          |
| 807 | UID871 | chr4 | NM_133723    | 9510417  | 9520867  | 9548056  | 9570864  | + | +50k  | - | AS | aspartate beta-hydroxylase isoform 2             |
| 808 | UID872 | chr4 | NM_026558    | 12137097 | 12147494 | 12080868 | 12099162 | + | -100k | - | AS | hypothetical protein LOC68099                    |
| 809 | UID872 | chr4 | NM_028226    | 12137097 | 12147494 | 12067263 | 12073892 | + | -100k | + | S  | RNA binding motif protein 12B                    |
| 810 | UID875 | chr4 | NM_178617    | 14978824 | 14989265 | 14879392 | 15076278 | + | -100k | - | AS | N-terminal EF-hand calcium binding protein 1     |
| 811 | UID876 | chr4 | NM_013752    | 15982683 | 15993124 | 15885113 | 15919736 | + | -100k | + | S  | nibrin                                           |

|     |        |      |              |           |           |           |           |   |       |   |    |                                                  |
|-----|--------|------|--------------|-----------|-----------|-----------|-----------|---|-------|---|----|--------------------------------------------------|
| 812 | UID876 | chr4 | NM_138952    | 15982683  | 15993124  | 16050521  | 16090645  | + | +100k | - | AS | receptor-interacting serine-threonine kinase 2   |
| 813 | UID876 | chr4 | NM_145950    | 15982683  | 15993124  | 15924267  | 15941024  | + | -100k | - | AS | oxidative stress induced growth inhibitor family |
| 814 | UID885 | chr4 | NM_013927    | 19114350  | 19124791  | 19207996  | 19437770  | + | +100k | + | AS | cyclic nucleotide gated channel beta 3           |
| 815 | UID888 | chr4 | NM_001080771 | 21738950  | 21749391  | 21768314  | 21776798  | + | +50k  | - | AS | PR domain containing 13                          |
| 816 | UID888 | chr4 | NM_016746    | 21738950  | 21749391  | 21818537  | 21841381  | + | +100k | + | AS | cyclin C isoform 1                               |
| 817 | UID888 | chr4 | NM_001122982 | 21738950  | 21749391  | 21818537  | 21838797  | + | +100k | + | AS | cyclin C isoform 2                               |
| 818 | UID894 | chr4 | NM_025545    | 40783085  | 40793526  | 40870748  | 40891587  | + | +100k | - | AS | aprataxin isoform a                              |
| 819 | UID894 | chr4 | NM_001025444 | 40783085  | 40793526  | 40870748  | 40891858  | + | +100k | - | AS | aprataxin isoform b                              |
| 820 | UID895 | chr4 | NM_023231    | 43141302  | 43151743  | 43048789  | 43052484  | + | -100k | - | AS | stomatin-like protein 2                          |
| 821 | UID895 | chr4 | NM_172691    | 43141302  | 43151743  | 43053609  | 43067303  | + | -100k | - | AS | hypothetical protein LOC230088                   |
| 822 | UID895 | chr4 | NM_001081413 | 43141302  | 43151743  | 43080083  | 43285973  | + | -100k | + | S  | unc-13 homolog B                                 |
| 823 | UID897 | chr4 | NM_145368    | 49347483  | 49357881  | 49400944  | 49429251  | + | +100k | - | AS | acyl-coenzyme A amino acid N-acyltransferase 2   |
| 824 | UID898 | chr4 | NM_001033351 | 49750172  | 49760570  | 49686325  | 49866181  | + | -100k | - | AS | glutamate receptor ionotropic, NMDA3A            |
| 825 | UID898 | chr4 | NM_001004025 | 49750172  | 49760570  | 49699846  | 49703083  | + | -100k | - | AS | protein phosphatase 3, regulatory subunit B,     |
| 826 | UID898 | chr4 | NM_001163263 | 49750172  | 49760570  | 49653159  | 49677986  | + | -100k | + | S  | ring finger protein 20                           |
| 827 | UID898 | chr4 | NM_182999    | 49750172  | 49760570  | 49653159  | 49677986  | + | -100k | + | S  | ring finger protein 20                           |
| 828 | UID899 | chr4 | NM_001162865 | 51317589  | 51327987  | 51237777  | 51251028  | + | -100k | + | S  | cylicin, basic protein of sperm head             |
| 829 | UID901 | chr4 | NM_139309    | 53687574  | 53698015  | 53735281  | 53784371  | + | +50k  | + | AS | fukutin                                          |
| 830 | UID901 | chr4 | NM_176966    | 53687574  | 53698015  | 53652654  | 53672719  | + | -50k  | + | S  | cystatin and DUF19 domain-containing protein 1   |
| 831 | UID906 | chr4 | NM_021297    | 66258684  | 66269125  | 66314171  | 66329157  | + | +100k | + | AS | toll-like receptor 4 precursor                   |
| 832 | UID917 | chr4 | NM_031202    | 80281032  | 80291473  | 80305460  | 80322949  | + | +50k  | + | AS | tyrosinase-related protein 1 precursor           |
| 833 | UID920 | chr4 | NM_001081096 | 85937186  | 85947621  | 85915928  | 86029534  | + | -50k  | - | AS | hypothetical protein LOC75811                    |
| 834 | UID927 | chr4 | NM_027089    | 94380760  | 94391201  | 94399310  | 94420828  | + | +20k  | - | AS | acrosome formation associated factor precursor   |
| 835 | UID927 | chr4 | NM_177239    | 94380760  | 94391201  | 94434058  | 94471118  | + | +100k | - | AS | myb-like, SWIRM and MPN domains 1                |
| 836 | UID928 | chr4 | NM_001113412 | 94999593  | 95009991  | 95049524  | 95418957  | + | +50k  | + | AS | FGGY carbohydrate kinase domain containing       |
| 837 | UID928 | chr4 | NM_029347    | 94999593  | 95009991  | 95071438  | 95313587  | + | +100k | + | AS | FGGY carbohydrate kinase domain containing       |
| 838 | UID929 | chr4 | NM_010425    | 99220394  | 99230835  | 99148316  | 99150689  | + | -100k | + | S  | forkhead box D3                                  |
| 839 | UID929 | chr4 | NM_001081264 | 99220394  | 99230835  | 99207647  | 99255478  | + | -20k  | + | S  | dolichyl pyrophosphate Man9GlcNAc2               |
| 840 | UID929 | chr4 | NM_026348    | 99220394  | 99230835  | 99257419  | 99321136  | + | +50k  | - | AS | integrin beta 3 binding protein                  |
| 841 | UID930 | chr4 | NM_177732    | 102768241 | 102778682 | 102669649 | 102712816 | + | -100k | - | AS | solute carrier family 35 (UDP-glucuronic         |
| 842 | UID930 | chr4 | NM_025909    | 102768241 | 102778682 | 102811777 | 102864360 | + | +50k  | + | AS | OMA1 homolog, zinc metallopeptidase precursor    |
| 843 | UID930 | chr4 | NM_001163494 | 102768241 | 102778682 | 102728379 | 102788795 | + | -50k  | - | AS | hypothetical protein LOC70941 isoform 2          |
| 844 | UID930 | chr4 | NM_027612    | 102768241 | 102778682 | 102728379 | 102788795 | + | -50k  | - | AS | hypothetical protein LOC70941 isoform 1          |
| 845 | UID934 | chr4 | NM_183300    | 108195547 | 108206033 | 108137190 | 108221808 | + | -100k | - | AS | zinc finger, FYVE domain containing 9            |
| 846 | UID934 | chr4 | NM_177045    | 108195547 | 108206033 | 108117887 | 108132054 | + | -100k | + | S  | coiled-coil and C2 domain containing 1B          |
| 847 | UID935 | chr4 | NM_013876    | 109033031 | 109043429 | 108950788 | 108974437 | + | -100k | - | AS | ring finger protein 11                           |
| 848 | UID935 | chr4 | NM_026291    | 109033031 | 109043429 | 109003306 | 109029229 | + | -50k  | - | AS | hypothetical protein LOC67646                    |
| 849 | UID936 | chr4 | NM_001038698 | 109681895 | 109692339 | 109701668 | 109785443 | + | +20k  | - | AS | ELAV-like 4 isoform b                            |
| 850 | UID936 | chr4 | NM_001163399 | 109681895 | 109692339 | 109701669 | 109784766 | + | +20k  | - | AS | ELAV-like 4 isoform d                            |
| 851 | UID936 | chr4 | NM_010488    | 109681895 | 109692339 | 109701669 | 109784766 | + | +20k  | - | AS | ELAV-like 4 isoform a                            |
| 852 | UID936 | chr4 | NM_001163397 | 109681895 | 109692339 | 109701669 | 109849843 | + | +20k  | - | AS | ELAV-like 4 isoform c                            |
| 853 | UID937 | chr4 | NM_177406    | 114832135 | 114842576 | 114796977 | 114830747 | + | -50k  | + | S  | cytochrome P450, family 4, subfamily a           |
| 854 | UID937 | chr4 | NM_172306    | 114832135 | 114842576 | 114909555 | 114936966 | + | +100k | + | AS | cytochrome P450, family 4, subfamily a family    |

|     |        |      |              |           |           |           |           |   |       |   |    |                                                 |
|-----|--------|------|--------------|-----------|-----------|-----------|-----------|---|-------|---|----|-------------------------------------------------|
| 855 | UID937 | chr4 | NM_001100183 | 114832135 | 114842576 | 114740015 | 114752489 | + | -100k | + | S  | cytochrome P450, family 4, subfamily a          |
| 856 | UID939 | chr4 | NM_001039595 | 142848670 | 142859153 | 142778029 | 142784518 | + | -100k | + | S  | pramel family member                            |
| 857 | UID939 | chr4 | NM_001113736 | 142848670 | 142859153 | 142802640 | 142809158 | + | -50k  | + | S  | pramel family member                            |
| 858 | UID939 | chr4 | NM_001113735 | 142848670 | 142859153 | 142802640 | 142809158 | + | -50k  | + | S  | pramel family member                            |
| 859 | UID939 | chr4 | NM_001113736 | 142848670 | 142859153 | 142777998 | 142784520 | + | -100k | + | S  | pramel family member                            |
| 860 | UID939 | chr4 | NM_001113735 | 142848670 | 142859153 | 142818386 | 142824923 | + | -50k  | + | S  | pramel family member                            |
| 861 | UID939 | chr4 | NM_001113735 | 142848670 | 142859153 | 142777998 | 142784520 | + | -100k | + | S  | pramel family member                            |
| 862 | UID939 | chr4 | NM_001007579 | 142848670 | 142859153 | 142834153 | 142840485 | + | -20k  | + | S  | hypothetical protein LOC329986                  |
| 863 | UID939 | chr4 | NM_001126325 | 142848670 | 142859153 | 142920446 | 142923933 | + | +100k | - | AS | hypothetical protein LOC277668                  |
| 864 | UID939 | chr4 | NM_001126324 | 142848670 | 142859153 | 142881689 | 142885282 | + | +50k  | + | AS | hypothetical protein LOC279185                  |
| 865 | UID939 | chr4 | NM_001113736 | 142848670 | 142859153 | 142818386 | 142824923 | + | -50k  | + | S  | pramel family member                            |
| 866 | UID940 | chr4 | NM_001085419 | 143435801 | 143448866 | 143366566 | 143376788 | + | -100k | + | S  | hypothetical protein LOC100038764               |
| 867 | UID940 | chr4 | NM_198661    | 143435801 | 143448866 | 143457416 | 143463621 | + | +50k  | + | AS | oogenesis 2                                     |
| 868 | UID940 | chr4 | NM_201258    | 143435801 | 143448866 | 143424243 | 143429338 | + | -20k  | - | AS | oogenesis 3                                     |
| 869 | UID941 | chr4 | NM_001081248 | 143864956 | 143875439 | 143880393 | 143890085 | + | +20k  | + | AS | predicted gene 13177                            |
| 870 | UID941 | chr4 | NM_001085504 | 143864956 | 143875439 | 143936623 | 143953055 | + | +100k | - | AS | hypothetical protein LOC230890                  |
| 871 | UID941 | chr4 | NM_001085542 | 143864956 | 143875439 | 143821686 | 143831821 | + | -50k  | - | AS | hypothetical protein LOC627085                  |
| 872 | UID941 | chr4 | NM_198662    | 143864956 | 143875439 | 143786508 | 143796040 | + | -100k | + | S  | arylacetamide deacetylase-like                  |
| 873 | UID942 | chr4 | NM_001126316 | 144080479 | 144090920 | 144043890 | 144053270 | + | -50k  | - | AS | hypothetical protein LOC329993                  |
| 874 | UID942 | chr4 | NM_011303    | 144080479 | 144090920 | 144159763 | 144194896 | + | +100k | + | AS | dehydrogenase/reductase (SDR family) member 3   |
| 875 | UID943 | chr4 | NM_001081248 | 143912016 | 143922499 | 143880393 | 143890085 | - | -50k  | + | AS | predicted gene 13177                            |
| 876 | UID943 | chr4 | NM_001085504 | 143912016 | 143922499 | 143936623 | 143953055 | - | +50k  | - | S  | hypothetical protein LOC230890                  |
| 877 | UID943 | chr4 | NM_001085542 | 143912016 | 143922499 | 143821686 | 143831821 | - | -100k | - | AS | hypothetical protein LOC627085                  |
| 878 | UID943 | chr4 | NM_001085536 | 143912016 | 143922499 | 143969877 | 143988091 | - | +100k | - | S  | hypothetical protein LOC546849                  |
| 879 | UID944 | chr4 | NM_001039595 | 142793390 | 142803831 | 142778029 | 142784518 | - | -20k  | + | AS | pramel family member                            |
| 880 | UID944 | chr4 | NM_001113736 | 142793390 | 142803831 | 142802640 | 142809158 | - | +10k  | + | AS | pramel family member                            |
| 881 | UID944 | chr4 | NM_001113735 | 142793390 | 142803831 | 142802640 | 142809158 | - | +10k  | + | AS | pramel family member                            |
| 882 | UID944 | chr4 | NM_173773    | 142793390 | 142803831 | 142703850 | 142716989 | - | -100k | - | AS | oogenesis 4                                     |
| 883 | UID944 | chr4 | NM_001113736 | 142793390 | 142803831 | 142777998 | 142784520 | - | -20k  | + | AS | pramel family member                            |
| 884 | UID944 | chr4 | NM_001113735 | 142793390 | 142803831 | 142818386 | 142824923 | - | +50k  | + | AS | pramel family member                            |
| 885 | UID944 | chr4 | NM_001113735 | 142793390 | 142803831 | 142777998 | 142784520 | - | -20k  | + | AS | pramel family member                            |
| 886 | UID944 | chr4 | NM_001007579 | 142793390 | 142803831 | 142834153 | 142840485 | - | +50k  | + | AS | hypothetical protein LOC329986                  |
| 887 | UID944 | chr4 | NM_001126324 | 142793390 | 142803831 | 142881689 | 142885282 | - | +100k | + | AS | hypothetical protein LOC279185                  |
| 888 | UID944 | chr4 | NM_001113736 | 142793390 | 142803831 | 142818386 | 142824923 | - | +50k  | + | AS | pramel family member                            |
| 889 | UID946 | chr4 | NM_023865    | 122207800 | 122218244 | 122191561 | 122207438 | - | -20k  | + | AS | palmitoyl-protein thioesterase-like protein     |
| 890 | UID947 | chr4 | NM_001033791 | 120745156 | 120755639 | 120813950 | 120822552 | - | +100k | - | S  | hypothetical protein LOC545677                  |
| 891 | UID948 | chr4 | NM_177406    | 114841410 | 114851851 | 114796977 | 114830747 | - | -50k  | + | AS | cytochrome P450, family 4, subfamily a,         |
| 892 | UID948 | chr4 | NM_172306    | 114841410 | 114851851 | 114909555 | 114936966 | - | +100k | + | AS | cytochrome P450, family 4, subfamily a family   |
| 893 | UID949 | chr4 | NM_177818    | 111426628 | 111437069 | 111470858 | 111481052 | - | +50k  | + | AS | selection and upkeep of intraepithelial T cells |
| 894 | UID949 | chr4 | NM_001102662 | 111426628 | 111437069 | 111504200 | 111527470 | - | +100k | + | AS | selection and upkeep of intraepithelial T cells |
| 895 | UID949 | chr4 | NM_001100466 | 111426628 | 111437069 | 111417486 | 111448288 | - | -10k  | + | AS | selection and upkeep of intraepithelial T cells |
| 896 | UID949 | chr4 | NM_001142775 | 111426628 | 111437069 | 111470858 | 111486151 | - | +50k  | + | AS | selection and upkeep of intraepithelial T cells |
| 897 | UID949 | chr4 | NM_145551    | 111426628 | 111437069 | 111373308 | 111400728 | - | -100k | - | AS | solute carrier family 5 (sodium/glucose         |

|     |        |      |              |           |           |           |           |   |       |   |    |                                                  |
|-----|--------|------|--------------|-----------|-----------|-----------|-----------|---|-------|---|----|--------------------------------------------------|
| 898 | UID950 | chr4 | NM_001048189 | 109966483 | 109976882 | 109895722 | 111155442 | - | -100k | + | AS | carboxypeptidase 6, cytosolic isoform 2          |
| 899 | UID950 | chr4 | NM_030231    | 109966483 | 109976882 | 109895722 | 111155442 | - | -100k | + | AS | carboxypeptidase 6, cytosolic isoform 1          |
| 900 | UID951 | chr4 | NM_001048189 | 109812438 | 109822879 | 109895722 | 111155442 | - | +100k | + | AS | carboxypeptidase 6, cytosolic isoform 2          |
| 901 | UID951 | chr4 | NM_030231    | 109812438 | 109822879 | 109895722 | 111155442 | - | +100k | + | AS | carboxypeptidase 6, cytosolic isoform 1          |
| 902 | UID954 | chr4 | NM_025909    | 102870632 | 102881073 | 102811777 | 102864360 | - | -100k | + | AS | OMA1 homolog, zinc metallopeptidase precursor    |
| 903 | UID955 | chr4 | NM_146146    | 101250497 | 101260895 | 101215338 | 101313286 | - | -50k  | + | AS | leptin receptor isoform 1                        |
| 904 | UID955 | chr4 | NM_010704    | 101250497 | 101260895 | 101215338 | 101290190 | - | -50k  | + | AS | leptin receptor isoform 2                        |
| 905 | UID955 | chr4 | NM_001122899 | 101250497 | 101260895 | 101215338 | 101311599 | - | -50k  | + | AS | leptin receptor isoform 3                        |
| 906 | UID955 | chr4 | NM_001033790 | 101250497 | 101260895 | 101332900 | 101341954 | - | +100k | - | S  | hypothetical protein LOC545662                   |
| 907 | UID957 | chr4 | NM_007704    | 98133588  | 98144074  | 98038651  | 98211621  | - | -100k | + | AS | InaD-like isoform 3                              |
| 908 | UID957 | chr4 | NM_001005787 | 98133588  | 98144074  | 98038651  | 98181028  | - | -100k | + | AS | InaD-like isoform 4                              |
| 909 | UID957 | chr4 | NM_001081202 | 98133588  | 98144074  | 98218771  | 98230504  | - | +100k | + | AS | LINE-1 type transposase domain containing 1      |
| 910 | UID958 | chr4 | NM_013690    | 94282606  | 94293004  | 94231317  | 94366957  | - | -100k | + | AS | endothelial-specific receptor tyrosine kinase    |
| 911 | UID959 | chr4 | NM_026319    | 94190318  | 94200759  | 94106537  | 94185251  | - | -100k | + | AS | coiled-coil domain containing 2                  |
| 912 | UID959 | chr4 | NM_013690    | 94190318  | 94200759  | 94231317  | 94366957  | - | +50k  | + | AS | endothelial-specific receptor tyrosine kinase    |
| 913 | UID959 | chr4 | NM_175305    | 94190318  | 94200759  | 94128677  | 94142162  | - | -100k | - | AS | leucine rich repeat containing 19 precursor      |
| 914 | UID964 | chr4 | NM_010486    | 90674737  | 90685178  | 90742784  | 90864073  | - | +100k | - | S  | ELAV-like 2 isoform 2                            |
| 915 | UID964 | chr4 | NM_207686    | 90674737  | 90685178  | 90742784  | 90864073  | - | +100k | - | S  | ELAV-like 2 isoform 3                            |
| 916 | UID964 | chr4 | NM_207685    | 90674737  | 90685178  | 90742784  | 90892002  | - | +100k | - | S  | ELAV-like 2 isoform 1                            |
| 917 | UID969 | chr4 | NM_029931    | 87144730  | 87155171  | 87241155  | 87277545  | - | +100k | - | S  | myeloid/lymphoid or mixed lineage-leukemia       |
| 918 | UID969 | chr4 | NM_027326    | 87144730  | 87155171  | 87241155  | 87504638  | - | +100k | - | S  | myeloid/lymphoid or mixed lineage-leukemia       |
| 919 | UID973 | chr4 | NM_026821    | 80431408  | 80441849  | 80381916  | 80425532  | - | -50k  | + | AS | hypothetical protein LOC52829                    |
| 920 | UID976 | chr4 | NM_011211    | 75395190  | 75405631  | 75412469  | 76065530  | - | +20k  | - | S  | protein tyrosine phosphatase, receptor type, D   |
| 921 | UID976 | chr4 | NM_001014288 | 75395190  | 75405631  | 75412469  | 75604707  | - | +20k  | - | S  | protein tyrosine phosphatase, receptor type, D   |
| 922 | UID978 | chr4 | NM_025849    | 74818967  | 74829403  | 74748584  | 74749517  | - | -100k | - | AS | hypothetical protein LOC66928                    |
| 923 | UID979 | chr4 | NM_011599    | 71559275  | 71569716  | 71603502  | 71687280  | - | +50k  | - | S  | transducin-like enhancer protein 1               |
| 924 | UID988 | chr4 | NM_001009550 | 61645156  | 61655597  | 61634192  | 61637202  | - | -20k  | - | AS | major urinary protein 26                         |
| 925 | UID988 | chr4 | NM_009554    | 61645156  | 61655597  | 61675903  | 61694907  | - | +50k  | - | S  | zinc finger protein 37                           |
| 926 | UID988 | chr4 | NM_001039544 | 61645156  | 61655597  | 61569837  | 61573673  | - | -100k | - | AS | major urinary protein 3 precursor                |
| 927 | UID989 | chr4 | NM_001037127 | 58478672  | 58489113  | 58380015  | 58468357  | - | -100k | + | AS | skeletal muscle receptor tyrosine kinase isoform |
| 928 | UID989 | chr4 | NM_010944    | 58478672  | 58489113  | 58380015  | 58468357  | - | -100k | + | AS | skeletal muscle receptor tyrosine kinase isoform |
| 929 | UID989 | chr4 | NM_172989    | 58478672  | 58489113  | 58529305  | 58647347  | - | +100k | - | S  | lysophosphatidic acid receptor 1                 |
| 930 | UID989 | chr4 | NM_010336    | 58478672  | 58489113  | 58529305  | 58647545  | - | +100k | - | S  | lysophosphatidic acid receptor 1                 |
| 931 | UID989 | chr4 | NM_001037128 | 58478672  | 58489113  | 58380015  | 58468357  | - | -100k | + | AS | skeletal muscle receptor tyrosine kinase isoform |
| 932 | UID989 | chr4 | NM_001037130 | 58478672  | 58489113  | 58380015  | 58468357  | - | -100k | + | AS | skeletal muscle receptor tyrosine kinase isoform |
| 933 | UID989 | chr4 | NM_001037129 | 58478672  | 58489113  | 58380015  | 58468357  | - | -100k | + | AS | skeletal muscle receptor tyrosine kinase isoform |
| 934 | UID990 | chr4 | NM_011660    | 58105023  | 58115464  | 58037426  | 58050465  | - | -100k | - | AS | thioredoxin 1                                    |
| 935 | UID990 | chr4 | NM_026132    | 58105023  | 58115464  | 58078082  | 58103178  | - | -50k  | - | AS | thioredoxin domain containing 8                  |
| 936 | UID990 | chr4 | NM_022814    | 58105023  | 58115464  | 58136849  | 58300650  | - | +50k  | - | S  | polydom precursor                                |
| 937 | UID994 | chr4 | NM_133891    | 53406915  | 53417356  | 53461512  | 53643578  | - | +100k | + | AS | solute carrier family 44, member 1 isoform A     |
| 938 | UID994 | chr4 | NM_001159633 | 53406915  | 53417356  | 53461512  | 53571264  | - | +100k | + | AS | solute carrier family 44, member 1 isoform B     |
| 939 | UID995 | chr4 | NM_025623    | 53072211  | 53082652  | 53033023  | 53043159  | - | -50k  | + | AS | nipsnap homolog 3B                               |
| 940 | UID995 | chr4 | NM_013454    | 53072211  | 53082652  | 53051888  | 53180995  | - | -50k  | - | AS | ATP-binding cassette 1, sub-family A, member 1   |

|     |         |      |              |           |           |           |           |   |       |   |    |                                                                   |
|-----|---------|------|--------------|-----------|-----------|-----------|-----------|---|-------|---|----|-------------------------------------------------------------------|
| 941 | UID995  | chr4 | NM_146607    | 53072211  | 53082652  | 52991728  | 52992667  | - | -100k | + | AS | olfactory receptor 270                                            |
| 942 | UID995  | chr4 | NM_028529    | 53072211  | 53082652  | 53010383  | 53021954  | - | -100k | + | AS | nipsnap homolog 3A                                                |
| 943 | UID1001 | chr4 | NM_172688    | 32220184  | 32230583  | 32292719  | 32352077  | - | +100k | + | AS | mitogen-activated protein kinase kinase kinase 7                  |
| 944 | UID1001 | chr4 | NM_009316    | 32220184  | 32230583  | 32292719  | 32352077  | - | +100k | + | AS | mitogen-activated protein kinase kinase kinase 7                  |
| 945 | UID1008 | chr4 | NM_008899    | 22625727  | 22636168  | 22577628  | 22578966  | - | -50k  | - | AS | POU domain, class 3, transcription factor 2                       |
| 946 | UID1010 | chr4 | NM_010281    | 20258493  | 20268891  | 20164802  | 20188862  | - | -100k | + | AS | gamma-glutamyl hydrolase precursor                                |
| 947 | UID1010 | chr4 | NM_172987    | 20258493  | 20268891  | 20334687  | 20869503  | - | +100k | - | S  | Na <sup>+</sup> /K <sup>+</sup> transporting ATPase interacting 3 |
| 948 | UID1011 | chr4 | NM_028746    | 19670211  | 19680652  | 19745873  | 19769360  | - | +100k | + | AS | aspartate/glutamate transporter 1                                 |
| 949 | UID1012 | chr4 | NM_025476    | 19589881  | 19600279  | 19502213  | 19534079  | - | -100k | + | AS | family with sequence similarity 82, member B                      |
| 950 | UID1012 | chr4 | NM_177327    | 19589881  | 19600279  | 19536819  | 19636140  | - | -100k | - | AS | WW domain-containing protein 1                                    |
| 951 | UID1017 | chr4 | NM_178617    | 14940366  | 14950762  | 14879392  | 15076278  | - | -100k | - | AS | N-terminal EF-hand calcium binding protein 1                      |
| 952 | UID1020 | chr4 | NM_173746    | 12879660  | 12890099  | 12834004  | 12908618  | - | -50k  | + | AS | hypothetical protein LOC208820                                    |
| 953 | UID1024 | chr4 | NM_013526    | 9848024   | 9858422   | 9771518   | 9789492   | - | -100k | + | AS | growth differentiation factor 6 precursor                         |
| 954 | UID1024 | chr4 | NR_004448    | 9848024   | 9858422   | 9843111   | 9844544   | - | -5k   | - | AS |                                                                   |
| 955 | UID1025 | chr4 | NM_001081417 | 8580494   | 8590935   | 8618067   | 8793956   | - | +50k  | + | AS | chromodomain helicase DNA binding protein 7                       |
| 956 | UID1026 | chr4 | NM_173426    | 5634808   | 5645252   | 5571325   | 5727091   | - | -100k | + | AS | hypothetical protein LOC242297                                    |
| 957 | UID1033 | chr8 | NM_007850    | 23064503  | 23074900  | 23121345  | 23122186  | + | +100k | + | AS | alpha-defensin, 27 precursor                                      |
| 958 | UID1033 | chr8 | NM_010039    | 23064503  | 23074900  | 23131341  | 23131513  | + | +100k | + | AS | alpha-defensin, 28 precursor                                      |
| 959 | UID1033 | chr8 | NM_001079933 | 23064503  | 23074900  | 23083727  | 23084427  | + | +20k  | + | AS | alpha-defensin, 26 precursor                                      |
| 960 | UID1033 | chr8 | NM_183268    | 23064503  | 23074900  | 22974800  | 22975782  | + | -100k | + | S  | defensin-related cryptdin 20                                      |
| 961 | UID1033 | chr8 | NR_003146    | 23064503  | 23074900  | 23160556  | 23161398  | + | +100k | + | AS |                                                                   |
| 962 | UID1036 | chr8 | NM_145841    | 39019481  | 39029964  | 38991070  | 40130025  | + | -50k  | - | AS | sarcoglycan zeta                                                  |
| 963 | UID1045 | chr8 | NM_001163564 | 69879866  | 69890264  | 69789205  | 69819553  | + | -100k | + | S  | nuclear assembly factor 1 homolog                                 |
| 964 | UID1049 | chr8 | NM_145600    | 85706011  | 85716452  | 85653724  | 85664231  | + | -100k | - | AS | zinc finger protein 330                                           |
| 965 | UID1049 | chr8 | NM_177378    | 85706011  | 85716452  | 85753460  | 85974919  | + | +50k  | + | AS | ring finger protein 150 precursor                                 |
| 966 | UID1053 | chr8 | NM_130457    | 115366814 | 115377257 | 115456019 | 115768684 | + | +100k | + | AS | contactin associated protein-like 4 precursor                     |
| 967 | UID1054 | chr8 | NM_130457    | 115530296 | 115540737 | 115456019 | 115768684 | - | -100k | + | AS | contactin associated protein-like 4 precursor                     |
| 968 | UID1063 | chr8 | NM_053200    | 95999314  | 96009712  | 96055199  | 96086932  | - | +100k | - | S  | carboxylesterase 3 precursor                                      |
| 969 | UID1063 | chr8 | NM_133660    | 95999314  | 96009712  | 96090346  | 96118669  | - | +100k | - | S  | esterase 22 precursor                                             |
| 970 | UID1063 | chr8 | NM_001013764 | 95999314  | 96009712  | 95909341  | 95937320  | - | -100k | - | AS | hypothetical protein LOC244595                                    |
| 971 | UID1063 | chr8 | NM_001081372 | 95999314  | 96009712  | 95945854  | 95969145  | - | -100k | - | AS | predicted gene 5158                                               |
| 972 | UID1063 | chr8 | NM_007954    | 95999314  | 96009712  | 95988145  | 96020411  | - | -20k  | - | AS | esterase 1 precursor                                              |
| 973 | UID1064 | chr8 | NM_022428    | 95473608  | 95484091  | 95563529  | 95569208  | - | +100k | + | AS | Iroquois related homeobox 6                                       |
| 974 | UID1065 | chr8 | NM_026904    | 82654813  | 82665254  | 82607891  | 82673393  | - | -50k  | + | AS | anaphase promoting complex subunit 10                             |
| 975 | UID1065 | chr8 | NM_015751    | 82654813  | 82665254  | 82579513  | 82607812  | - | -100k | - | AS | ATP-binding cassette, subfamily E, member 1                       |
| 976 | UID1066 | chr8 | NM_010442    | 78035261  | 78045205  | 77989689  | 77996664  | - | -50k  | + | AS | heme oxygenase (decyclizing) 1                                    |
| 977 | UID1066 | chr8 | NM_008566    | 78035261  | 78045205  | 78005599  | 78024511  | - | -50k  | + | AS | minichromosome maintenance deficient 5, cell                      |
| 978 | UID1066 | chr8 | NM_029182    | 78035261  | 78045205  | 78110015  | 78120185  | - | +100k | + | AS | RASD family, member 2 precursor                                   |
| 979 | UID1071 | chr8 | NM_011922    | 65047602  | 65058043  | 64949662  | 65015260  | - | -100k | - | AS | annexin A10 isoform 2                                             |
| 980 | UID1071 | chr8 | NM_001136089 | 65047602  | 65058043  | 64949663  | 65015239  | - | -100k | - | AS | annexin A10 isoform 1                                             |
| 981 | UID1073 | chr8 | NM_010402    | 60282008  | 60292406  | 60213124  | 60216659  | - | -100k | + | AS | heart and neural crest derivatives expressed                      |
| 982 | UID1073 | chr8 | NM_009136    | 60282008  | 60292406  | 60348064  | 60369727  | - | +100k | + | AS | scrapie responsive gene 1 precursor                               |
| 983 | UID1073 | chr8 | NM_021788    | 60282008  | 60292406  | 60374843  | 60380002  | - | +100k | - | S  | sin3 associated polypeptide                                       |

|      |         |      |              |           |           |           |           |   |       |   |    |                                                |
|------|---------|------|--------------|-----------|-----------|-----------|-----------|---|-------|---|----|------------------------------------------------|
| 984  | UID1078 | chr8 | NM_026067    | 36966962  | 36977396  | 36933781  | 36964050  | - | -50k  | - | AS | three prime histone mRNA exonuclease 1         |
| 985  | UID1078 | chr8 | NM_001081279 | 36966962  | 36977396  | 37056314  | 37147966  | - | +100k | + | AS | malignant fibrous histiocytoma amplified       |
| 986  | UID1081 | chr8 | NM_153135    | 30078747  | 30089144  | 30112652  | 30685572  | - | +50k  | - | S  | unc-5 homolog D precursor                      |
| 987  | UID1087 | chr5 | NM_198620    | 8554395   | 8564836   | 8496341   | 8628958   | + | -100k | - | AS | RUN domain containing 3B                       |
| 988  | UID1088 | chr5 | NM_011076    | 8655990   | 8666388   | 8666097   | 8754576   | + | +20k  | + | AS | ATP-binding cassette, subfamily B, member 1A   |
| 989  | UID1089 | chr5 | NM_013657    | 17118115  | 17128556  | 17086639  | 17242091  | + | -50k  | + | S  | semaphorin 3C precursor                        |
| 990  | UID1090 | chr5 | NM_001136060 | 27623925  | 27634366  | 27592870  | 28057268  | + | -50k  | + | S  | dipeptidylpeptidase 6 isoform 1                |
| 991  | UID1091 | chr5 | NM_020295    | 29504734  | 29515176  | 29560588  | 29709177  | + | +100k | - | AS | limb region 1                                  |
| 992  | UID1091 | chr5 | NM_021470    | 29504734  | 29515176  | 29528792  | 29556078  | + | +50k  | + | AS | ring finger protein 32                         |
| 993  | UID1099 | chr5 | NM_019468    | 62063969  | 62074410  | 62097079  | 62098714  | + | +50k  | + | AS | glucose-6-phosphate dehydrogenase 2            |
| 994  | UID1103 | chr5 | NM_023784    | 69808086  | 69818527  | 69795812  | 69821767  | + | -20k  | - | AS | Yip1 domain family, member 7                   |
| 995  | UID1103 | chr5 | NM_172711    | 69808086  | 69818527  | 69836076  | 69852765  | + | +50k  | + | AS | GUF1 GTPase homolog                            |
| 996  | UID1103 | chr5 | NM_001038015 | 69808086  | 69818527  | 69854136  | 69871420  | + | +50k  | - | AS | glucosamine-6-phosphate deaminase 2            |
| 997  | UID1105 | chr5 | NM_010252    | 71038255  | 71048738  | 71030181  | 71121752  | + | -10k  | - | AS | gamma-aminobutyric acid A receptor, gamma 1    |
| 998  | UID1107 | chr5 | NM_001159518 | 78481390  | 78491831  | 78424016  | 78482820  | + | -100k | - | AS | insulin-like growth factor binding protein 7   |
| 999  | UID1107 | chr5 | NM_153798    | 78481390  | 78491831  | 78385258  | 78424102  | + | -100k | + | S  | DNA directed RNA polymerase II polypeptide B   |
| 1000 | UID1107 | chr5 | NM_008048    | 78481390  | 78491831  | 78424016  | 78482820  | + | -100k | - | AS | insulin-like growth factor binding protein 7   |
| 1001 | UID1108 | chr5 | NR_027806    | 78608050  | 78618455  | 78585969  | 78586523  | + | -50k  | - | AS |                                                |
| 1002 | UID1112 | chr5 | NM_001122668 | 96058812  | 96069246  | 96016171  | 96044532  | + | -50k  | + | S  | hypothetical protein LOC665943                 |
| 1003 | UID1112 | chr5 | NM_198667    | 96058812  | 96069246  | 95972393  | 95976475  | + | -100k | - | AS | hypothetical protein LOC381724                 |
| 1004 | UID1113 | chr5 | NM_172885    | 128162789 | 128173272 | 128072693 | 128747770 | + | -100k | - | AS | transmembrane protein 132D precursor           |
| 1005 | UID1114 | chr5 | NM_001105159 | 145732215 | 145742613 | 145812190 | 145838257 | + | +100k | - | AS | cytochrome P450, family 3, subfamily a,        |
| 1006 | UID1114 | chr5 | NM_017396    | 145732215 | 145742613 | 145812190 | 145838257 | + | +100k | - | AS | cytochrome P450, family 3, subfamily a,        |
| 1007 | UID1114 | chr5 | NM_007820    | 145732215 | 145742613 | 145689835 | 145723250 | + | -50k  | - | AS | cytochrome P450, family 3, subfamily a,        |
| 1008 | UID1115 | chr5 | NM_001105159 | 145757139 | 145767537 | 145812190 | 145838257 | + | +100k | - | AS | cytochrome P450, family 3, subfamily a,        |
| 1009 | UID1115 | chr5 | NM_017396    | 145757139 | 145767537 | 145812190 | 145838257 | + | +100k | - | AS | cytochrome P450, family 3, subfamily a,        |
| 1010 | UID1115 | chr5 | NM_007820    | 145757139 | 145767537 | 145689835 | 145723250 | + | -100k | - | AS | cytochrome P450, family 3, subfamily a,        |
| 1011 | UID1116 | chr5 | NM_177879    | 141579361 | 141589759 | 141494007 | 142466265 | - | -100k | + | AS | sidekick 1 precursor                           |
| 1012 | UID1117 | chr5 | NM_010294    | 97759015  | 97769456  | 97695462  | 97697310  | - | -100k | - | AS | glycerol kinase 2                              |
| 1013 | UID1118 | chr5 | NM_144910    | 96253052  | 96263449  | 96317098  | 96402292  | - | +100k | - | S  | CCR4-NOT transcription complex, subunit 6-like |
| 1014 | UID1118 | chr5 | NM_178854    | 96253052  | 96263449  | 96316039  | 96402057  | - | +100k | - | S  | CCR4-NOT transcription complex, subunit 6-like |
| 1015 | UID1118 | chr5 | NM_018866    | 96253052  | 96263449  | 96197240  | 96201370  | - | -100k | + | AS | chemokine (C-X-C motif) ligand 13 precursor    |
| 1016 | UID1121 | chr5 | NM_007423    | 91609302  | 91619745  | 91565913  | 91584107  | - | -50k  | + | AS | alpha fetoprotein precursor                    |
| 1017 | UID1121 | chr5 | NM_009654    | 91609302  | 91619745  | 91536088  | 91551803  | - | -100k | + | AS | albumin precursor                              |
| 1018 | UID1121 | chr5 | NM_028478    | 91609302  | 91619745  | 91678275  | 91715687  | - | +100k | - | S  | Ras association (RalGDS/AF-6) domain family    |
| 1019 | UID1121 | chr5 | NM_145146    | 91609302  | 91619745  | 91594148  | 91628744  | - | -20k  | + | AS | afamin precursor                               |
| 1020 | UID1122 | chr5 | NM_145561    | 87436468  | 87446909  | 87377414  | 87447948  | - | -100k | - | AS | transmembrane protease, serine 11d precursor   |
| 1021 | UID1122 | chr5 | NM_001033233 | 87436468  | 87446909  | 87484970  | 87543551  | - | +50k  | - | S  | transmembrane protease, serine 11a             |
| 1022 | UID1129 | chr5 | NM_001018019 | 68377670  | 68388114  | 68310969  | 68445531  | - | -100k | + | AS | glutaredoxin, cysteine rich 1                  |
| 1023 | UID1134 | chr5 | NM_181857    | 34357956  | 34368397  | 34324056  | 34486305  | - | -50k  | - | AS | DNA-directed DNA polymerase nu                 |
| 1024 | UID1134 | chr5 | NM_001001985 | 34357956  | 34368397  | 34312840  | 34322773  | - | -50k  | + | AS | N-acetyltransferase 8-like                     |
| 1025 | UID1134 | chr5 | NM_001033458 | 34357956  | 34368397  | 34300330  | 34301862  | - | -100k | + | AS | hypothetical protein LOC381633                 |
| 1026 | UID1135 | chr5 | NM_001033457 | 29679291  | 29689732  | 29765453  | 29782956  | - | +100k | + | AS | nucleolar protein with MIF4G domain 1-like     |



|      |         |       |              |           |           |           |           |   |       |   |    |                                                 |
|------|---------|-------|--------------|-----------|-----------|-----------|-----------|---|-------|---|----|-------------------------------------------------|
| 1027 | UID1136 | chr5  | NM_001136060 | 27688675  | 27699158  | 27592870  | 28057268  | - | -100k | + | AS | dipeptidylpeptidase 6 isoform 1                 |
| 1028 | UID1137 | chr5  | NM_001136060 | 27555017  | 27565416  | 27592870  | 28057268  | - | +50k  | + | AS | dipeptidylpeptidase 6 isoform 1                 |
| 1029 | UID1142 | chr5  | NM_011995    | 14551481  | 14561925  | 14520923  | 14869465  | - | -50k  | + | AS | piccolo isoform 1                               |
| 1030 | UID1142 | chr5  | NM_001110796 | 14551481  | 14561925  | 14520923  | 14802012  | - | -50k  | + | AS | piccolo isoform 2                               |
| 1031 | UID1144 | chr5  | NM_001163223 | 6741026   | 6751467   | 6775037   | 7350384   | - | +50k  | - | S  | zinc finger protein 804B                        |
| 1032 | UID1146 | chr5  | NM_194462    | 3986547   | 3996988   | 3934191   | 4086210   | - | -100k | + | AS | A kinase (PRKA) anchor protein (yotiao) 9       |
| 1033 | UID1146 | chr5  | NM_001013023 | 3986547   | 3996988   | 3896586   | 3899939   | - | -100k | - | AS | mitochondrial transcription termination factor  |
| 1034 | UID1146 | chr5  | NM_172135    | 3986547   | 3996988   | 3896586   | 3899939   | - | -100k | - | AS | mitochondrial transcription termination factor  |
| 1035 | UID1150 | chr17 | NM_172827    | 17256444  | 17266885  | 17232340  | 17329107  | + | -50k  | - | AS | leucyl/cystinyl aminopeptidase                  |
| 1036 | UID1151 | chr17 | NM_001104575 | 22405278  | 22415676  | 22305847  | 22323833  | + | -100k | + | S  | vomeronasal receptor Vmn2r112                   |
| 1037 | UID1152 | chr17 | NM_008205    | 36312829  | 36323270  | 36248477  | 36250697  | + | -100k | - | AS | histocompatibility 2, M region locus 9          |
| 1038 | UID1152 | chr17 | NM_177636    | 36312829  | 36323270  | 36278060  | 36280250  | + | -50k  | - | AS | histocompatibility 2, M region locus 1          |
| 1039 | UID1152 | chr17 | NM_177637    | 36312829  | 36323270  | 36380962  | 36384288  | + | +100k | + | AS | histocompatibility 2, M region locus 10.5       |
| 1040 | UID1153 | chr17 | NM_031863    | 40426043  | 40436484  | 40386538  | 40398035  | + | -50k  | - | AS | centromere protein Q                            |
| 1041 | UID1153 | chr17 | NM_008650    | 40426043  | 40436484  | 40398208  | 40424383  | + | -50k  | + | S  | methylmalonyl-Coenzyme A mutase precursor       |
| 1042 | UID1153 | chr17 | NM_001145060 | 40426043  | 40436484  | 40368224  | 40377834  | + | -100k | - | AS | glycine N-acyltransferase-like protein 3        |
| 1043 | UID1153 | chr17 | NM_027834    | 40426043  | 40436484  | 40338965  | 40344042  | + | -100k | - | AS | hypothetical protein LOC71583                   |
| 1044 | UID1154 | chr17 | NM_001104582 | 55047852  | 55058293  | 55068358  | 55100690  | + | +50k  | - | AS | vomeronasal 2, receptor 118                     |
| 1045 | UID1155 | chr17 | NM_001081653 | 57381607  | 57392051  | 57454904  | 58095677  | + | +100k | + | AS | contactin associated protein-like 5C precursor  |
| 1046 | UID1156 | chr17 | NM_026497    | 58728252  | 58738690  | 58686731  | 58698653  | + | -50k  | - | AS | nudix-type motif 12                             |
| 1047 | UID1158 | chr17 | NM_009547    | 69226726  | 69237167  | 69288879  | 69295446  | + | +100k | + | AS | zinc finger protein 161                         |
| 1048 | UID1158 | chr17 | NR_026848    | 69226726  | 69237167  | 69321348  | 69324092  | + | +100k | + | AS |                                                 |
| 1049 | UID1163 | chr17 | NM_001112798 | 81254690  | 81265131  | 81281430  | 81646703  | - | +50k  | - | S  | solute carrier family 8 (sodium/calcium         |
| 1050 | UID1163 | chr17 | NM_011406    | 81254690  | 81265131  | 81281430  | 81646703  | - | +50k  | - | S  | solute carrier family 8 (sodium/calcium         |
| 1051 | UID1164 | chr17 | NM_009994    | 79548756  | 79559154  | 79615278  | 79623367  | - | +100k | - | S  | cytochrome P450, family 1, subfamily b,         |
| 1052 | UID1164 | chr17 | NM_201361    | 79548756  | 79559154  | 79523225  | 79590478  | - | -50k  | + | AS | hypothetical protein LOC381110                  |
| 1053 | UID1169 | chr17 | NM_001104547 | 18305254  | 18315695  | 18286344  | 18302775  | - | -20k  | + | AS | vomeronasal 2, receptor 96                      |
| 1054 | UID1170 | chr17 | NM_001104539 | 17384279  | 17394678  | 17408558  | 17438785  | - | +50k  | + | AS | vomeronasal receptor Vmn2r90                    |
| 1055 | UID1178 | chr9  | NM_001011812 | 39190786  | 39201227  | 39144363  | 39145308  | + | -50k  | + | S  | olfactory receptor 951                          |
| 1056 | UID1178 | chr9  | NM_146503    | 39190786  | 39201227  | 39176695  | 39177640  | + | -20k  | - | AS | olfactory receptor 952                          |
| 1057 | UID1178 | chr9  | NM_146331    | 39190786  | 39201227  | 39212003  | 39212948  | + | +50k  | + | AS | olfactory receptor 954                          |
| 1058 | UID1178 | chr9  | NM_207141    | 39190786  | 39201227  | 39220350  | 39221295  | + | +50k  | - | AS | olfactory receptor 955                          |
| 1059 | UID1178 | chr9  | NM_146830    | 39190786  | 39201227  | 39234774  | 39244559  | + | +50k  | - | AS | olfactory receptor 44                           |
| 1060 | UID1178 | chr9  | NM_146745    | 39190786  | 39201227  | 39261353  | 39262289  | + | +100k | - | AS | olfactory receptor 957                          |
| 1061 | UID1179 | chr9  | NM_172444    | 59840373  | 59850817  | 59767724  | 59939141  | + | -100k | - | AS | thrombospondin, type I, domain containing 4     |
| 1062 | UID1179 | chr9  | NM_001040426 | 59840373  | 59850817  | 59767714  | 60309041  | + | -100k | - | AS | thrombospondin, type I, domain containing 4     |
| 1063 | UID1179 | chr9  | NM_013708    | 59840373  | 59850817  | 59740776  | 59748085  | + | -100k | - | AS | nuclear receptor subfamily 2, group E, member 3 |
| 1064 | UID1179 | chr9  | NM_001101600 | 59840373  | 59850817  | 59749299  | 59757049  | + | -100k | + | S  | hypothetical protein LOC665389                  |
| 1065 | UID1180 | chr9  | NM_001081153 | 73191249  | 73201647  | 73276555  | 73730699  | + | +100k | - | AS | unc13 homolog 3                                 |
| 1066 | UID1181 | chr9  | NM_144533    | 98057680  | 98068121  | 98105934  | 98220780  | + | +50k  | + | AS | nicotinamide mononucleotide adenyltransferase   |
| 1067 | UID1183 | chr9  | NM_175025    | 105189440 | 105199838 | 105269461 | 105353217 | + | +100k | - | AS | calcium-transporting ATPase 2C1                 |
| 1068 | UID1183 | chr9  | NM_025651    | 105189440 | 105199838 | 105253621 | 105263561 | + | +100k | + | AS | asteroid homolog 1 isoform 1                    |
| 1069 | UID1184 | chr9  | NM_026179    | 122143028 | 122153257 | 122200313 | 122230221 | + | +100k | + | AS | abhydrolase domain containing 5                 |

|      |         |      |              |           |           |           |           |   |       |   |    |                                              |
|------|---------|------|--------------|-----------|-----------|-----------|-----------|---|-------|---|----|----------------------------------------------|
| 1070 | UID1185 | chr9 | NM_015793    | 109101424 | 109111822 | 109128530 | 109145082 | - | +50k  | - | S  | F-box and WD-40 domain protein 14            |
| 1071 | UID1185 | chr9 | NM_177598    | 109101424 | 109111822 | 109036632 | 109053381 | - | -100k | - | AS | F-box and WD-40 domain protein 13            |
| 1072 | UID1185 | chr9 | NM_001008428 | 109101424 | 109111822 | 109074837 | 109092130 | - | -50k  | - | AS | F-box and WD-40 domain protein 20            |
| 1073 | UID1187 | chr9 | NM_177909    | 94444379  | 94454777  | 94479260  | 95038800  | - | +50k  | + | AS | solute carrier family 9 (sodium/hydrogen)    |
| 1074 | UID1191 | chr9 | NM_175213    | 81726098  | 81736539  | 81660461  | 81824209  | - | -100k | + | AS | hypothetical protein LOC75033                |
| 1075 | UID1192 | chr9 | NM_009022    | 70987227  | 70997668  | 71014348  | 71094803  | - | +50k  | + | AS | aldehyde dehydrogenase 1A2                   |
| 1076 | UID1192 | chr9 | NM_022026    | 70987227  | 70997668  | 70909220  | 70961849  | - | -100k | - | AS | aquaporin 9                                  |
| 1077 | UID1194 | chr9 | NM_146869    | 38249418  | 38259862  | 38153446  | 38154400  | - | -100k | + | AS | olfactory receptor 147                       |
| 1078 | UID1194 | chr9 | NM_001011806 | 38249418  | 38259862  | 38180854  | 38181790  | - | -100k | + | AS | olfactory receptor 901                       |
| 1079 | UID1194 | chr9 | NM_146802    | 38249418  | 38259862  | 38199444  | 38200374  | - | -50k  | + | AS | olfactory receptor 902                       |
| 1080 | UID1194 | chr9 | NM_146801    | 38249418  | 38259862  | 38214613  | 38215546  | - | -50k  | + | AS | olfactory receptor 904                       |
| 1081 | UID1194 | chr9 | NM_146804    | 38249418  | 38259862  | 38223319  | 38224252  | - | -50k  | + | AS | olfactory receptor 905                       |
| 1082 | UID1194 | chr9 | NM_146803    | 38249418  | 38259862  | 38238601  | 38239537  | - | -20k  | + | AS | olfactory receptor 906                       |
| 1083 | UID1194 | chr9 | NM_146805    | 38249418  | 38259862  | 38249241  | 38250174  | - | -5k   | + | AS | olfactory receptor 907                       |
| 1084 | UID1194 | chr9 | NM_146872    | 38249418  | 38259862  | 38266604  | 38267536  | - | +20k  | + | AS | olfactory receptor 908                       |
| 1085 | UID1194 | chr9 | NM_146873    | 38249418  | 38259862  | 38274304  | 38275240  | - | +50k  | + | AS | olfactory receptor 909                       |
| 1086 | UID1194 | chr9 | NM_146811    | 38249418  | 38259862  | 38289467  | 38290400  | - | +50k  | + | AS | olfactory receptor 910                       |
| 1087 | UID1194 | chr9 | NM_146810    | 38249418  | 38259862  | 38330814  | 38332782  | - | +100k | + | AS | olfactory receptor 912                       |
| 1088 | UID1194 | chr9 | NM_001011523 | 38249418  | 38259862  | 38344793  | 38345732  | - | +100k | + | AS | olfactory receptor 913                       |
| 1089 | UID1195 | chr9 | NM_029299    | 27213386  | 27223826  | 27146266  | 27151156  | - | -100k | + | AS | spermatogenesis associated 19 precursor      |
| 1090 | UID1197 | chr9 | NM_146606    | 18540406  | 18550805  | 18505093  | 18506035  | - | -50k  | - | AS | olfactory receptor 24                        |
| 1091 | UID1197 | chr9 | NM_146605    | 18540406  | 18550805  | 18565755  | 18566694  | - | +50k  | - | S  | olfactory receptor 828                       |
| 1092 | UID1197 | chr9 | NM_147067    | 18540406  | 18550805  | 18607028  | 18607994  | - | +100k | + | AS | olfactory receptor 829                       |
| 1093 | UID1197 | chr9 | NM_146566    | 18540406  | 18550805  | 18625730  | 18626678  | - | +100k | + | AS | olfactory receptor 830                       |
| 1094 | UID1201 | chr7 | NM_001111296 | 12691772  | 12702204  | 12633683  | 12673172  | - | -100k | + | AS | bile-salt sulfotransferase 2A1               |
| 1095 | UID1201 | chr7 | NM_009286    | 12691772  | 12702204  | 12633718  | 12673172  | - | -100k | + | AS | sulfotransferase family 2A,                  |
| 1096 | UID1203 | chr7 | NM_207547    | 19312190  | 19322586  | 19296644  | 19297610  | + | -20k  | - | AS | vomer nasal 1 receptor, D21                  |
| 1097 | UID1204 | chr7 | NM_001034904 | 21531712  | 21542156  | 21618193  | 21630049  | - | +100k | - | S  | similar to serine/threonine kinase           |
| 1098 | UID1204 | chr7 | NM_001034904 | 22754901  | 22765345  | 22841382  | 22853238  | - | +100k | - | S  | similar to serine/threonine kinase           |
| 1099 | UID1205 | chr7 | NM_001034904 | 21531712  | 21542156  | 21618193  | 21630049  | - | +100k | - | S  | similar to serine/threonine kinase           |
| 1100 | UID1205 | chr7 | NM_001034904 | 22754901  | 22765345  | 22841382  | 22853238  | - | +100k | - | S  | similar to serine/threonine kinase           |
| 1101 | UID1207 | chr7 | NM_001105055 | 41615718  | 41626122  | 41610033  | 41645823  | + | -10k  | - | AS | vomer nasal receptor Vmn2r58                 |
| 1102 | UID1217 | chr7 | NM_172310    | 65595729  | 65606212  | 65523847  | 65571043  | + | -100k | + | S  | threonyl-tRNA synthetase-like 2              |
| 1103 | UID1217 | chr7 | NM_026795    | 65595729  | 65606212  | 65572366  | 65580863  | + | -50k  | + | S  | TM2 domain containing 3 isoform 1            |
| 1104 | UID1217 | chr7 | NM_178056    | 65595729  | 65606212  | 65572366  | 65580863  | + | -50k  | + | S  | TM2 domain containing 3 isoform 2            |
| 1105 | UID1224 | chr7 | NM_017400    | 82084312  | 82094753  | 82048354  | 82183600  | + | -50k  | + | S  | SH3-domain GRB2-like 3                       |
| 1106 | UID1226 | chr7 | NM_011661    | 87249819  | 87260302  | 87303165  | 87369172  | + | +100k | - | AS | tyrosinase precursor                         |
| 1107 | UID1227 | chr7 | NM_001081414 | 87384637  | 87394872  | 87459537  | 88010439  | + | +100k | + | AS | glutamate receptor, metabotropic 5 isoform a |
| 1108 | UID1227 | chr7 | NM_001143834 | 87384637  | 87394872  | 87459537  | 88010439  | + | +100k | + | AS | glutamate receptor, metabotropic 5 isoform b |
| 1109 | UID1227 | chr7 | NM_011661    | 87384637  | 87394872  | 87303165  | 87369172  | + | -100k | - | AS | tyrosinase precursor                         |
| 1110 | UID1229 | chr7 | NM_207556    | 103153871 | 103164269 | 103060423 | 103061362 | + | -100k | + | S  | olfactory receptor 592                       |
| 1111 | UID1229 | chr7 | NM_146380    | 103153871 | 103164269 | 103085682 | 103086666 | + | -100k | + | S  | olfactory receptor 593                       |
| 1112 | UID1229 | chr7 | NM_207143    | 103153871 | 103164269 | 103093540 | 103094476 | + | -100k | + | S  | olfactory receptor 594                       |

|      |         |      |              |           |           |           |           |   |       |   |    |                                                  |
|------|---------|------|--------------|-----------|-----------|-----------|-----------|---|-------|---|----|--------------------------------------------------|
| 1113 | UID1229 | chr7 | NM_001001559 | 103153871 | 103164269 | 103123906 | 103126326 | + | -50k  | - | AS | deubiquitinating enzyme 2a                       |
| 1114 | UID1229 | chr7 | NM_001011845 | 103153871 | 103164269 | 103194233 | 103195181 | + | +50k  | + | AS | olfactory receptor 597                           |
| 1115 | UID1229 | chr7 | NM_001011793 | 103153871 | 103164269 | 103202308 | 103203268 | + | +50k  | + | AS | olfactory receptor 598                           |
| 1116 | UID1229 | chr7 | NM_146731    | 103153871 | 103164269 | 103211876 | 103212824 | + | +100k | + | AS | olfactory receptor 599                           |
| 1117 | UID1229 | chr7 | NM_147046    | 103153871 | 103164269 | 103219802 | 103220747 | + | +100k | - | AS | olfactory receptor 600                           |
| 1118 | UID1229 | chr7 | NM_146314    | 103153871 | 103164269 | 103232068 | 103233013 | + | +100k | - | AS | olfactory receptor 601                           |
| 1119 | UID1230 | chr7 | NM_008219    | 103792643 | 103803126 | 103715458 | 103716983 | + | -100k | - | AS | hemoglobin Z, beta-like embryonic chain          |
| 1120 | UID1230 | chr7 | NM_008221    | 103792643 | 103803126 | 103725574 | 103727028 | + | -100k | - | AS | hemoglobin Y, beta-like embryonic chain          |
| 1121 | UID1230 | chr7 | NM_013616    | 103792643 | 103803126 | 103777277 | 103781357 | + | -20k  | + | S  | olfactory receptor 65                            |
| 1122 | UID1230 | chr7 | NM_013618    | 103792643 | 103803126 | 103755126 | 103756062 | + | -50k  | - | AS | olfactory receptor 66                            |
| 1123 | UID1230 | chr7 | NM_013617    | 103792643 | 103803126 | 103766630 | 103768292 | + | -50k  | - | AS | olfactory receptor 64                            |
| 1124 | UID1230 | chr7 | NM_146959    | 103792643 | 103803126 | 103788882 | 103803732 | + | -5k   | + | S  | olfactory receptor 631                           |
| 1125 | UID1230 | chr7 | NM_147119    | 103792643 | 103803126 | 103811202 | 103812156 | + | +20k  | + | AS | olfactory receptor 632                           |
| 1126 | UID1230 | chr7 | NM_146354    | 103792643 | 103803126 | 103820388 | 103821327 | + | +50k  | + | AS | olfactory receptor 633                           |
| 1127 | UID1230 | chr7 | NM_147118    | 103792643 | 103803126 | 103852996 | 103853962 | + | +100k | + | AS | olfactory receptor 635                           |
| 1128 | UID1230 | chr7 | NM_147120    | 103792643 | 103803126 | 103877079 | 103878045 | + | +100k | + | AS | olfactory receptor 638                           |
| 1129 | UID1230 | chr7 | NM_147084    | 103792643 | 103803126 | 103885570 | 103886521 | + | +100k | - | AS | olfactory receptor 639                           |
| 1130 | UID1230 | chr7 | NM_001127686 | 103792643 | 103803126 | 103712944 | 103714342 | + | -100k | - | AS | hypothetical protein LOC436003                   |
| 1131 | UID1231 | chr7 | NM_146329    | 103991103 | 104001545 | 103923228 | 103924173 | + | -100k | - | AS | olfactory receptor 642                           |
| 1132 | UID1231 | chr7 | NM_146822    | 103991103 | 104001545 | 103895192 | 103896137 | + | -100k | - | AS | olfactory receptor 640                           |
| 1133 | UID1231 | chr7 | NM_147072    | 103991103 | 104001545 | 103913618 | 103914557 | + | -100k | + | S  | olfactory receptor 641                           |
| 1134 | UID1231 | chr7 | NM_147077    | 103991103 | 104001545 | 103932476 | 103933421 | + | -100k | - | AS | olfactory receptor 643                           |
| 1135 | UID1231 | chr7 | NM_147121    | 103991103 | 104001545 | 103941905 | 103942850 | + | -50k  | - | AS | olfactory receptor 644                           |
| 1136 | UID1231 | chr7 | NM_207144    | 103991103 | 104001545 | 103957951 | 103958899 | + | -50k  | - | AS | olfactory receptor 645                           |
| 1137 | UID1231 | chr7 | NM_147056    | 103991103 | 104001545 | 103980101 | 103981040 | + | -20k  | + | S  | olfactory receptor 646                           |
| 1138 | UID1231 | chr7 | NM_198623    | 103991103 | 104001545 | 104014443 | 104017093 | + | +50k  | - | AS | ubiquilin 3                                      |
| 1139 | UID1231 | chr7 | NM_198624    | 103991103 | 104001545 | 104022079 | 104024377 | + | +50k  | - | AS | ubiquilin-like                                   |
| 1140 | UID1231 | chr7 | NM_172905    | 103991103 | 104001545 | 104026833 | 104038637 | + | +50k  | - | AS | hypothetical protein LOC244180                   |
| 1141 | UID1231 | chr7 | NM_146751    | 103991103 | 104001545 | 104053276 | 104054227 | + | +100k | - | AS | olfactory receptor 648                           |
| 1142 | UID1231 | chr7 | NM_147055    | 103991103 | 104001545 | 104063087 | 104064026 | + | +100k | - | AS | olfactory receptor 649                           |
| 1143 | UID1232 | chr7 | NM_007627    | 105221030 | 105231603 | 105299640 | 105310159 | + | +100k | + | AS | cholecystinin B receptor                         |
| 1144 | UID1232 | chr7 | NM_001011533 | 105221030 | 105231603 | 105161915 | 105162881 | + | -100k | + | S  | olfactory receptor 688                           |
| 1145 | UID1232 | chr7 | NM_146750    | 105221030 | 105231603 | 105187826 | 105188789 | + | -50k  | + | S  | olfactory receptor 689                           |
| 1146 | UID1232 | chr7 | NM_147061    | 105221030 | 105231603 | 105210566 | 105211535 | + | -20k  | - | AS | olfactory receptor 691                           |
| 1147 | UID1232 | chr7 | NM_146355    | 105221030 | 105231603 | 105242148 | 105243138 | + | +50k  | + | AS | olfactory receptor 692                           |
| 1148 | UID1232 | chr7 | NM_001033317 | 105221030 | 105231603 | 105278388 | 105282559 | + | +100k | + | AS | cyclic nucleotide gated channel alpha 4          |
| 1149 | UID1232 | chr7 | NM_199009    | 105221030 | 105231603 | 105252430 | 105273832 | + | +50k  | - | AS | hypothetical protein LOC74349                    |
| 1150 | UID1232 | chr7 | NM_020290    | 105221030 | 105231603 | 105203037 | 105204099 | + | -20k  | - | AS | olfactory receptor 690                           |
| 1151 | UID1233 | chr7 | NM_146197    | 119292772 | 119303213 | 119352859 | 119387740 | + | +100k | + | AS | acyl-CoA synthetase medium-chain family member   |
| 1152 | UID1233 | chr7 | NM_025989    | 119292772 | 119303213 | 119233692 | 119250421 | + | -100k | - | AS | zymogen granule membrane glycoprotein 2          |
| 1153 | UID1233 | chr7 | NM_178758    | 119292772 | 119303213 | 119317413 | 119334509 | + | +50k  | + | AS | acyl-CoA synthetase medium-chain family member 5 |
| 1154 | UID1233 | chr7 | NM_009470    | 119292772 | 119303213 | 119254015 | 119270404 | + | -50k  | - | AS | uromodulin precursor                             |
| 1155 | UID1233 | chr7 | NM_027943    | 119292772 | 119303213 | 119277735 | 119314631 | + | -20k  | - | AS | protein disulfide isomerase-like, testis         |

|      |         |       |              |           |           |           |           |   |       |   |    |                                        |
|------|---------|-------|--------------|-----------|-----------|-----------|-----------|---|-------|---|----|----------------------------------------|
| 1156 | UID1234 | chr7  | NR_024051    | 120294785 | 120305226 | 120212849 | 120335960 | + | -100k | + | S  |                                        |
| 1157 | UID1234 | chr7  | NR_024324    | 120294785 | 120305226 | 120388773 | 120389623 | + | +100k | + | AS |                                        |
| 1158 | UID1238 | chr7  | NM_146329    | 103900405 | 103910847 | 103923228 | 103924173 | - | +50k  | - | S  | olfactory receptor 642                 |
| 1159 | UID1238 | chr7  | NM_147119    | 103900405 | 103910847 | 103811202 | 103812156 | - | -100k | + | AS | olfactory receptor 632                 |
| 1160 | UID1238 | chr7  | NM_146354    | 103900405 | 103910847 | 103820388 | 103821327 | - | -100k | + | AS | olfactory receptor 633                 |
| 1161 | UID1238 | chr7  | NM_147118    | 103900405 | 103910847 | 103852996 | 103853962 | - | -50k  | + | AS | olfactory receptor 635                 |
| 1162 | UID1238 | chr7  | NM_147120    | 103900405 | 103910847 | 103877079 | 103878045 | - | -50k  | + | AS | olfactory receptor 638                 |
| 1163 | UID1238 | chr7  | NM_147084    | 103900405 | 103910847 | 103885570 | 103886521 | - | -20k  | - | AS | olfactory receptor 639                 |
| 1164 | UID1238 | chr7  | NM_146822    | 103900405 | 103910847 | 103895192 | 103896137 | - | -10k  | - | AS | olfactory receptor 640                 |
| 1165 | UID1238 | chr7  | NM_147072    | 103900405 | 103910847 | 103913618 | 103914557 | - | +20k  | + | AS | olfactory receptor 641                 |
| 1166 | UID1238 | chr7  | NM_147077    | 103900405 | 103910847 | 103932476 | 103933421 | - | +50k  | - | S  | olfactory receptor 643                 |
| 1167 | UID1238 | chr7  | NM_147121    | 103900405 | 103910847 | 103941905 | 103942850 | - | +50k  | - | S  | olfactory receptor 644                 |
| 1168 | UID1238 | chr7  | NM_207144    | 103900405 | 103910847 | 103957951 | 103958899 | - | +100k | - | S  | olfactory receptor 645                 |
| 1169 | UID1238 | chr7  | NM_147056    | 103900405 | 103910847 | 103980101 | 103981040 | - | +100k | + | AS | olfactory receptor 646                 |
| 1170 | UID1239 | chr7  | NM_001162477 | 97015131  | 97025581  | 96956942  | 97184143  | - | -100k | + | AS | growth factor receptor bound protein   |
| 1171 | UID1239 | chr7  | NM_010248    | 97015131  | 97025581  | 96956942  | 97184143  | - | -100k | + | AS | growth factor receptor bound protein   |
| 1172 | UID1243 | chr7  | NM_001011767 | 86440050  | 86450491  | 86341173  | 86342166  | - | -100k | + | AS | olfactory receptor 299                 |
| 1173 | UID1243 | chr7  | NM_001011751 | 86440050  | 86450491  | 86364311  | 86365310  | - | -100k | - | AS | olfactory receptor 298                 |
| 1174 | UID1243 | chr7  | NM_146618    | 86440050  | 86450491  | 86402519  | 86403452  | - | -50k  | + | AS | olfactory receptor 297                 |
| 1175 | UID1243 | chr7  | NM_146851    | 86440050  | 86450491  | 86461037  | 86461967  | - | +50k  | + | AS | olfactory receptor 295                 |
| 1176 | UID1243 | chr7  | NM_001011750 | 86440050  | 86450491  | 86491396  | 86492404  | - | +100k | - | S  | olfactory receptor 294                 |
| 1177 | UID1243 | chr7  | NM_001011752 | 86440050  | 86450491  | 86539424  | 86540435  | - | +100k | + | AS | olfactory receptor 293                 |
| 1178 | UID1245 | chr7  | NM_017400    | 82027555  | 82037996  | 82048354  | 82183600  | - | +50k  | + | AS | SH3-domain GRB2-like 3                 |
| 1179 | UID1248 | chr7  | NM_130880    | 63251429  | 63261873  | 63323721  | 63637977  | - | +100k | + | AS | OTU domain containing 7                |
| 1180 | UID1253 | chr7  | NM_001037906 | 49921334  | 49931774  | 49843370  | 50731308  | - | -100k | + | AS | protein kinase C-binding protein NELL1 |
| 1181 | UID1254 | chr7  | NM_153101    | 47372885  | 47383284  | 47331828  | 47357604  | - | -50k  | - | AS | MAS-related GPR, member A2             |
| 1182 | UID1254 | chr7  | NM_153067    | 47372885  | 47383284  | 47456971  | 47469393  | - | +100k | - | S  | MAS-related GPR, member A3             |
| 1183 | UID1255 | chr7  | NM_207212    | 33748588  | 33759028  | 33818309  | 33842028  | - | +100k | - | S  | WT1-interacting protein                |
| 1184 | UID1255 | chr7  | NM_001099330 | 33748588  | 33759028  | 33804190  | 33809597  | - | +100k | + | AS | hypothetical protein LOC100043868      |
| 1185 | UID1255 | chr7  | NM_178308    | 33748588  | 33759028  | 33651756  | 33653745  | - | -100k | - | AS | androgen binding protein gamma         |
| 1186 | UID1255 | chr7  | NM_001100464 | 33748588  | 33759028  | 33720691  | 33722702  | - | -50k  | - | AS | androgen binding protein beta          |
| 1187 | UID1255 | chr7  | NM_009596    | 33748588  | 33759028  | 33730326  | 33731641  | - | -20k  | + | AS | androgen binding protein alpha         |
| 1188 | UID1256 | chr7  | NM_207212    | 33748588  | 33759028  | 33818309  | 33842028  | - | +100k | - | S  | WT1-interacting protein                |
| 1189 | UID1256 | chr7  | NM_001099330 | 33748588  | 33759028  | 33804190  | 33809597  | - | +100k | + | AS | hypothetical protein LOC100043868      |
| 1190 | UID1256 | chr7  | NM_178308    | 33748588  | 33759028  | 33651756  | 33653745  | - | -100k | - | AS | androgen binding protein gamma         |
| 1191 | UID1256 | chr7  | NM_001100464 | 33748588  | 33759028  | 33720691  | 33722702  | - | -50k  | - | AS | androgen binding protein beta          |
| 1192 | UID1256 | chr7  | NM_009596    | 33748588  | 33759028  | 33730326  | 33731641  | - | -20k  | + | AS | androgen binding protein alpha         |
| 1193 | UID1258 | chr10 | NM_026405    | 10272033  | 10282431  | 10235228  | 10248397  | + | -50k  | - | AS | RAB32                                  |
| 1194 | UID1262 | chr10 | NM_020565    | 33507938  | 33518379  | 33547137  | 33568891  | + | +50k  | + | AS | sulfotransferase family 3A, member 1   |
| 1195 | UID1262 | chr10 | NM_001101452 | 33507938  | 33518379  | 33455839  | 33471531  | + | -100k | - | AS | hypothetical protein LOC215895         |
| 1196 | UID1262 | chr10 | NM_001162957 | 33507938  | 33518379  | 33594526  | 33605437  | + | +100k | + | AS | radial spoke head 4 homolog A          |
| 1197 | UID1263 | chr10 | NM_009925    | 34121489  | 34131972  | 34079396  | 34086501  | + | -50k  | + | S  | procollagen, type X, alpha 1 precursor |
| 1198 | UID1263 | chr10 | NM_010237    | 34121489  | 34131972  | 34172815  | 34300642  | + | +100k | + | AS | fyn-related kinase                     |

|      |         |       |              |           |           |           |           |   |       |   |    |                                                |
|------|---------|-------|--------------|-----------|-----------|-----------|-----------|---|-------|---|----|------------------------------------------------|
| 1199 | UID1263 | chr10 | NM_001159544 | 34121489  | 34131972  | 34172815  | 34300642  | + | +100k | + | AS | fyn-related kinase                             |
| 1200 | UID1272 | chr10 | NM_011595    | 85661523  | 85674381  | 85730210  | 85779304  | + | +100k | + | AS | tissue inhibitor of metalloproteinase 3        |
| 1201 | UID1275 | chr10 | NM_001039354 | 106767694 | 106778135 | 106675940 | 106829253 | + | -100k | + | S  | lin 7 homolog a isoform 1                      |
| 1202 | UID1275 | chr10 | NM_001033223 | 106767694 | 106778135 | 106675940 | 106829253 | + | -100k | + | S  | lin 7 homolog a isoform 2                      |
| 1203 | UID1279 | chr10 | NM_178609    | 110248780 | 110259013 | 110149574 | 110191494 | + | -100k | + | S  | E2F transcription factor 7                     |
| 1204 | UID1279 | chr10 | NM_172554    | 110248780 | 110259013 | 110347146 | 110414118 | + | +100k | - | AS | zinc finger, DHHC domain containing 17         |
| 1205 | UID1279 | chr10 | NM_007792    | 110248780 | 110259013 | 110324285 | 110343624 | + | +100k | + | AS | cysteine and glycine-rich protein 2            |
| 1206 | UID1281 | chr10 | NM_001161855 | 115425219 | 115435657 | 115515774 | 115518027 | + | +100k | - | AS | RIKEN cDNA 4933416C03                          |
| 1207 | UID1281 | chr10 | NM_011217    | 115425219 | 115435657 | 115422472 | 115679039 | + | -5k   | + | S  | protein tyrosine phosphatase, receptor type, R |
| 1208 | UID1283 | chr10 | NM_001033474 | 112269085 | 112279526 | 112329537 | 112333136 | - | +100k | - | S  | hypothetical protein LOC382423                 |
| 1209 | UID1284 | chr10 | NM_029134    | 102636227 | 102646671 | 102644088 | 102666010 | - | +10k  | - | S  | leucine-rich repeats and IQ motif containing 1 |
| 1210 | UID1285 | chr10 | NM_146240    | 101855574 | 101866018 | 101941909 | 101976248 | - | +100k | + | AS | Ras association (RalGDS/AF-6) domain family    |
| 1211 | UID1285 | chr10 | NM_024435    | 101855574 | 101866018 | 101911443 | 101920106 | - | +100k | - | S  | neurotensin                                    |
| 1212 | UID1285 | chr10 | NM_026243    | 101855574 | 101866018 | 101804124 | 101821154 | - | -100k | + | AS | alpha-1,3-mannosyl-glycoprotein                |
| 1213 | UID1299 | chr10 | NM_175448    | 33260680  | 33271078  | 33201749  | 33314016  | - | -100k | - | AS | retinaldehyde binding protein 1-like 2         |
| 1214 | UID1300 | chr10 | NM_001002268 | 14172804  | 14182458  | 14092782  | 14235234  | - | -100k | - | AS | G protein-coupled receptor 126 precursor       |
| 1215 | UID1301 | chr10 | NM_009538    | 12686625  | 12697066  | 12780985  | 12821892  | - | +100k | + | AS | pleiomorphic adenoma gene-like 1               |
| 1216 | UID1301 | chr10 | NM_175102    | 12686625  | 12697066  | 12698647  | 12699380  | - | +20k  | + | AS | splicing factor 3b, subunit 5                  |
| 1217 | UID1301 | chr10 | NM_001163590 | 12686625  | 12697066  | 12630178  | 12654457  | - | -100k | - | AS | syntaxin 11                                    |
| 1218 | UID1301 | chr10 | NM_001163591 | 12686625  | 12697066  | 12630178  | 12654457  | - | -100k | - | AS | syntaxin 11                                    |
| 1219 | UID1301 | chr10 | NM_029075    | 12686625  | 12697066  | 12630178  | 12654457  | - | -100k | - | AS | syntaxin 11                                    |
| 1220 | UID1305 | chr12 | NM_011859    | 9649776   | 9660216   | 9600449   | 9607507   | + | -50k  | + | S  | odd-skipped related 1                          |
| 1221 | UID1306 | chr12 | NM_173417    | 11211054  | 11221495  | 11116544  | 11176716  | + | -100k | - | AS | potassium voltage-gated channel,               |
| 1222 | UID1306 | chr12 | NM_177331    | 11211054  | 11221495  | 11267268  | 11292130  | + | +100k | - | AS | Gen homolog 1, endonuclease                    |
| 1223 | UID1306 | chr12 | NM_025695    | 11211054  | 11221495  | 11292228  | 11346128  | + | +100k | + | AS | SMC6 protein                                   |
| 1224 | UID1306 | chr12 | NM_019544    | 11211054  | 11221495  | 11234724  | 11235291  | + | +50k  | - | AS | mesogenin 1                                    |
| 1225 | UID1310 | chr12 | NM_001003719 | 56548388  | 56558829  | 56521028  | 56739297  | + | -50k  | - | AS | GTPase activating RANGAP domain-like 1 isoform |
| 1226 | UID1310 | chr12 | NM_001112714 | 56548388  | 56558829  | 56521028  | 56739297  | + | -50k  | - | AS | GTPase activating RANGAP domain-like 1 isoform |
| 1227 | UID1310 | chr12 | NM_019994    | 56548388  | 56558829  | 56521028  | 56739297  | + | -50k  | - | AS | GTPase activating RANGAP domain-like 1 isoform |
| 1228 | UID1310 | chr12 | NM_020287    | 56548388  | 56558829  | 56517046  | 56520147  | + | -50k  | + | S  | insulinoma-associated 2                        |
| 1229 | UID1310 | chr12 | NR_003959    | 56548388  | 56558829  | 56483264  | 56484839  | + | -100k | + | S  |                                                |
| 1230 | UID1311 | chr12 | NM_009216    | 59035841  | 59046239  | 59129815  | 59134048  | + | +100k | + | AS | somatostatin receptor 1                        |
| 1231 | UID1317 | chr12 | NM_012024    | 76295716  | 76306158  | 76369720  | 76515040  | + | +100k | - | AS | epsilon isoform of regulatory subunit B56,     |
| 1232 | UID1317 | chr12 | NM_023275    | 76295716  | 76306158  | 76227152  | 76320295  | + | -100k | + | S  | ras homolog gene family, member J precursor    |
| 1233 | UID1317 | chr12 | NM_175644    | 76295716  | 76306158  | 76330559  | 76335621  | + | +50k  | - | AS | glycoprotein hormone beta 5 precursor          |
| 1234 | UID1323 | chr12 | NM_173023    | 101845175 | 101855618 | 101805731 | 102026998 | + | -50k  | + | S  | cation channel, sperm-associated, beta         |
| 1235 | UID1325 | chr12 | NM_001163136 | 119956745 | 119967188 | 119887511 | 119911032 | - | -100k | + | AS | metastasis associated in colon cancer 1        |
| 1236 | UID1328 | chr12 | NM_001081169 | 112501491 | 112511974 | 112554490 | 112575381 | - | +100k | + | AS | 60 kDa lysophospholipase                       |
| 1237 | UID1328 | chr12 | NM_027360    | 112501491 | 112511974 | 112409183 | 112414785 | - | -100k | - | AS | 6.8 kDa mitochondrial proteolipid              |
| 1238 | UID1328 | chr12 | NM_001097621 | 112501491 | 112511974 | 112594015 | 112629555 | - | +100k | + | AS | kinesin family member 26A                      |
| 1239 | UID1328 | chr12 | NM_001127685 | 112501491 | 112511974 | 112427130 | 112428559 | - | -100k | - | AS | hypothetical protein LOC217874                 |
| 1240 | UID1328 | chr12 | NM_029056    | 112501491 | 112511974 | 112419366 | 112516662 | - | -100k | + | AS | tudor domain containing 9                      |
| 1241 | UID1329 | chr12 | NM_013747    | 102806141 | 102816582 | 102870959 | 102898957 | - | +100k | + | AS | golgi autoantigen, golgin subfamily a, 5       |

|      |         |       |              |           |           |           |           |   |       |   |    |                                                |
|------|---------|-------|--------------|-----------|-----------|-----------|-----------|---|-------|---|----|------------------------------------------------|
| 1242 | UID1329 | chr12 | NM_011175    | 102806141 | 102816582 | 102795147 | 102840747 | - | -20k  | - | AS | legumain precursor                             |
| 1243 | UID1330 | chr12 | NM_183186    | 99542039  | 99552480  | 99596143  | 99851124  | - | +100k | - | S  | checkpoint suppressor 1                        |
| 1244 | UID1331 | chr12 | NM_027076    | 96395131  | 96405565  | 96442445  | 96443053  | - | +50k  | - | S  | hypothetical protein LOC69423                  |
| 1245 | UID1332 | chr12 | NM_201518    | 96006223  | 96016664  | 96088056  | 96181042  | - | +100k | + | AS | fibronectin leucine rich transmembrane protein |
| 1246 | UID1342 | chr12 | NM_029760    | 53030411  | 53040852  | 53019365  | 53232579  | - | -20k  | + | AS | nucleotide binding protein-like                |
| 1247 | UID1342 | chr12 | NM_008159    | 53030411  | 53040852  | 52944625  | 52949683  | - | -100k | - | AS | G protein-coupled receptor 33                  |
| 1248 | UID1347 | chr12 | NM_015763    | 16647197  | 16657638  | 16561148  | 16615250  | - | -100k | - | AS | lipin 1 isoform b                              |
| 1249 | UID1347 | chr12 | NM_172950    | 16647197  | 16657638  | 16561148  | 16615250  | - | -100k | - | AS | lipin 1 isoform a                              |
| 1250 | UID1347 | chr12 | NM_015764    | 16647197  | 16657638  | 16696094  | 16826366  | - | +50k  | - | S  | Greb1 protein                                  |
| 1251 | UID1347 | chr12 | NM_008747    | 16647197  | 16657638  | 16678949  | 16685716  | - | +50k  | + | AS | neurotensin receptor 2                         |
| 1252 | UID1347 | chr12 | NM_001130412 | 16647197  | 16657638  | 16561148  | 16615250  | - | -100k | - | AS | lipin 1 isoform a                              |
| 1253 | UID1352 | chr6  | NM_028990    | 13443291  | 13453732  | 13530688  | 13558063  | + | +100k | - | AS | transmembrane protein 168                      |
| 1254 | UID1357 | chr6  | NM_028459    | 24620366  | 24630804  | 24563814  | 24614981  | + | -100k | - | AS | Wiskott-Aldrich syndrome-like                  |
| 1255 | UID1357 | chr6  | NM_029848    | 24620366  | 24630804  | 24698376  | 24716529  | + | +100k | + | AS | hyaluronoglucosaminidase 4                     |
| 1256 | UID1357 | chr6  | NM_053098    | 24620366  | 24630804  | 24547780  | 24555424  | + | -100k | + | S  | leiomodoin 2 (cardiac)                         |
| 1257 | UID1357 | chr6  | NM_028920    | 24620366  | 24630804  | 24683254  | 24695462  | + | +100k | + | AS | hyaluronoglucosaminidase 6                     |
| 1258 | UID1360 | chr6  | NM_001081678 | 28125131  | 28135531  | 28189940  | 28211611  | + | +100k | - | AS | zinc finger protein 800                        |
| 1259 | UID1362 | chr6  | NM_172728    | 53407679  | 53418074  | 53502951  | 53625410  | + | +100k | + | AS | cAMP responsive element binding protein 5      |
| 1260 | UID1363 | chr6  | NM_053235    | 57214376  | 57224817  | 57139435  | 57140338  | + | -100k | + | S  | vomeronasal 1 receptor, C5                     |
| 1261 | UID1363 | chr6  | NM_053237    | 57214376  | 57224817  | 57163016  | 57163928  | + | -100k | + | S  | vomeronasal 1 receptor, C7                     |
| 1262 | UID1363 | chr6  | NM_053236    | 57214376  | 57224817  | 57187726  | 57188626  | + | -50k  | + | S  | vomeronasal 1 receptor, C6                     |
| 1263 | UID1363 | chr6  | NM_134184    | 57214376  | 57224817  | 57252301  | 57253213  | + | +50k  | - | AS | vomeronasal 1 receptor, C29                    |
| 1264 | UID1363 | chr6  | NM_134171    | 57214376  | 57224817  | 57290044  | 57290956  | + | +100k | - | AS | vomeronasal 1 receptor, C16                    |
| 1265 | UID1369 | chr6  | NM_019455    | 65142357  | 65152798  | 65046871  | 65074308  | + | -100k | - | AS | prostaglandin D2 synthase, hematopoietic       |
| 1266 | UID1370 | chr6  | NM_175524    | 65244728  | 65255170  | 65310871  | 65387728  | + | +100k | + | AS | hypothetical protein LOC243407                 |
| 1267 | UID1372 | chr6  | NM_009042    | 78411784  | 78422215  | 78355491  | 78358175  | + | -100k | + | S  | regenerating islet-derived 1 precursor         |
| 1268 | UID1372 | chr6  | NM_009043    | 78411784  | 78422215  | 78334663  | 78337606  | + | -100k | + | S  | regenerating islet-derived 2 precursor         |
| 1269 | UID1372 | chr6  | NM_011260    | 78411784  | 78422215  | 78395776  | 78398383  | + | -20k  | - | AS | regenerating islet-derived 3 gamma precursor   |
| 1270 | UID1379 | chr6  | NM_001014997 | 129820118 | 129830562 | 129732339 | 129741542 | + | -100k | - | AS | killer cell lectin-like receptor subfamily H,  |
| 1271 | UID1379 | chr6  | NM_008463    | 129820118 | 129830562 | 129864680 | 129878917 | + | +50k  | - | AS | killer cell lectin-like receptor, subfamily A, |
| 1272 | UID1379 | chr6  | NM_133203    | 129820118 | 129830562 | 129796846 | 129842363 | + | -50k  | - | AS | killer cell lectin-like receptor, subfamily A, |
| 1273 | UID1380 | chr6  | NM_177787    | 137985512 | 137995920 | 137947785 | 138037394 | + | -50k  | - | AS | solute carrier family 15, member 5             |
| 1274 | UID1381 | chr6  | NM_011216    | 137190841 | 137201240 | 137216660 | 137427428 | - | +50k  | + | AS | protein tyrosine phosphatase, receptor type, O |
| 1275 | UID1383 | chr6  | NM_021899    | 122874054 | 122884540 | 122786129 | 122810980 | - | -100k | + | AS | forkhead box J2                                |
| 1276 | UID1383 | chr6  | NM_009779    | 122874054 | 122884540 | 122812758 | 122821776 | - | -100k | - | AS | complement component 3a receptor 1             |
| 1277 | UID1383 | chr6  | NM_026267    | 122874054 | 122884540 | 122840175 | 122854560 | - | -50k  | + | AS | NECAP endocytosis associated 1                 |
| 1278 | UID1383 | chr6  | NM_199311    | 122874054 | 122884540 | 122887476 | 122900238 | - | +20k  | + | AS | C-type lectin domain family 4, member a1       |
| 1279 | UID1383 | chr6  | NM_153197    | 122874054 | 122884540 | 122918262 | 122935493 | - | +50k  | + | AS | dendritic cell inhibitory receptor 3           |
| 1280 | UID1383 | chr6  | NM_001005860 | 122874054 | 122884540 | 122955985 | 122989724 | - | +100k | + | AS | C-type lectin domain family 4, member a4       |
| 1281 | UID1386 | chr6  | NM_010585    | 108230670 | 108241153 | 108178872 | 108516887 | - | -100k | + | AS | inositol 1,4,5-triphosphate receptor 1         |
| 1282 | UID1389 | chr6  | NM_001102670 | 95174633  | 95185073  | 95083368  | 95095250  | - | -100k | + | AS | T-cell activation kelch repeat protein isoform |
| 1283 | UID1389 | chr6  | NM_001008785 | 95174633  | 95185073  | 95083368  | 95095250  | - | -100k | + | AS | T-cell activation kelch repeat protein isoform |
| 1284 | UID1390 | chr6  | NM_011684    | 89992005  | 90002446  | 89897153  | 89906011  | - | -100k | - | AS | vomeronasal 1 receptor, A2                     |

|      |         |       |              |          |          |          |          |   |       |   |    |                                               |
|------|---------|-------|--------------|----------|----------|----------|----------|---|-------|---|----|-----------------------------------------------|
| 1285 | UID1390 | chr6  | NM_053229    | 89992005 | 90002446 | 89941674 | 89942604 | - | -100k | + | AS | vomeronasal 1 receptor, B8                    |
| 1286 | UID1390 | chr6  | NM_053219    | 89992005 | 90002446 | 89987391 | 89988324 | - | -5k   | + | AS | vomeronasal 1 receptor, A4                    |
| 1287 | UID1390 | chr6  | NM_053218    | 89992005 | 90002446 | 90001436 | 90002345 | - | +10k  | - | S  | vomeronasal 1 receptor, A3                    |
| 1288 | UID1390 | chr6  | NM_053225    | 89992005 | 90002446 | 90072778 | 90073711 | - | +100k | + | AS | vomeronasal 1 receptor, B1                    |
| 1289 | UID1390 | chr6  | NM_011683    | 89992005 | 90002446 | 90088146 | 90096149 | - | +100k | + | AS | vomeronasal 1 receptor, A1                    |
| 1290 | UID1390 | chr6  | NM_011911    | 89992005 | 90002446 | 90037589 | 90038522 | - | +50k  | - | S  | vomeronasal 1, receptor B2                    |
| 1291 | UID1392 | chr6  | NM_134169    | 66577103 | 66587501 | 66541228 | 66542146 | - | -50k  | - | AS | vomeronasal 1 receptor, C14                   |
| 1292 | UID1392 | chr6  | NM_134167    | 66577103 | 66587501 | 66608371 | 66609262 | - | +50k  | - | S  | vomeronasal 1 receptor, C12                   |
| 1293 | UID1392 | chr6  | NM_134166    | 66577103 | 66587501 | 66645549 | 66646467 | - | +100k | - | S  | vomeronasal 1 receptor, C11                   |
| 1294 | UID1392 | chr6  | NM_134165    | 66577103 | 66587501 | 66660969 | 66661878 | - | +100k | + | AS | vomeronasal 1 receptor, C10                   |
| 1295 | UID1392 | chr6  | NM_134170    | 66577103 | 66587501 | 66481760 | 66489286 | - | -100k | - | AS | vomeronasal 1 receptor, C15                   |
| 1296 | UID1398 | chr6  | NM_134177    | 58353362 | 58363760 | 58364514 | 58365423 | - | +20k  | - | S  | vomeronasal 1 receptor, C22                   |
| 1297 | UID1409 | chr16 | NM_001013761 | 26779374 | 26789815 | 26872467 | 26905207 | + | +100k | - | AS | hypothetical protein LOC239789                |
| 1298 | UID1410 | chr16 | NM_175548    | 41492452 | 41502893 | 41452673 | 42065545 | + | -50k  | + | S  | limbic system-associated membrane protein     |
| 1299 | UID1417 | chr16 | NM_173069    | 69772816 | 69783258 | 69739515 | 69746386 | + | -50k  | - | AS | spermatogenesis associated glutamate (E)-rich |
| 1300 | UID1425 | chr16 | NM_018778    | 88413474 | 88423915 | 88449684 | 88452042 | + | +50k  | - | AS | claudin 8                                     |
| 1301 | UID1425 | chr16 | NM_181490    | 88413474 | 88423915 | 88394665 | 88395837 | + | -20k  | - | AS | claudin 17                                    |
| 1302 | UID1425 | chr16 | NM_001163141 | 88413474 | 88423915 | 88499567 | 88501138 | + | +100k | - | AS | keratin associated protein 24-1               |
| 1303 | UID1426 | chr16 | NM_028621    | 89216033 | 89226474 | 89291885 | 89292633 | + | +100k | - | AS | keratin associated protein 16-7               |
| 1304 | UID1426 | chr16 | NM_010673    | 89216033 | 89226474 | 89308181 | 89308970 | + | +100k | - | AS | keratin associated protein 6-2                |
| 1305 | UID1427 | chr16 | NM_001113406 | 89522436 | 89532877 | 89459034 | 89460042 | + | -100k | - | AS | keratin associated protein 11-1               |
| 1306 | UID1429 | chr16 | NM_009621    | 85601720 | 85612118 | 85683023 | 85692311 | - | +100k | - | S  | a disintegrin-like and metalloprotease        |
| 1307 | UID1433 | chr16 | NM_175549    | 73873550 | 73883991 | 73774985 | 74293592 | - | -100k | - | AS | roundabout homolog 2                          |
| 1308 | UID1438 | chr16 | NM_007938    | 59639460 | 59649903 | 59595738 | 60547787 | - | -50k  | - | AS | Eph receptor A6                               |
| 1309 | UID1438 | chr16 | NM_019665    | 59639460 | 59649903 | 59555576 | 59581595 | - | -100k | - | AS | ADP-ribosylation factor-like 6                |
| 1310 | UID1439 | chr16 | NM_146397    | 59112794 | 59123235 | 59016410 | 59017334 | - | -100k | - | AS | olfactory receptor 190                        |
| 1311 | UID1439 | chr16 | NM_001011807 | 59112794 | 59123235 | 59027807 | 59028737 | - | -100k | - | AS | olfactory receptor 191                        |
| 1312 | UID1439 | chr16 | NM_207549    | 59112794 | 59123235 | 59040321 | 59041246 | - | -100k | - | AS | olfactory receptor 192                        |
| 1313 | UID1439 | chr16 | NM_001011791 | 59112794 | 59123235 | 59051934 | 59052864 | - | -100k | - | AS | olfactory receptor 193                        |
| 1314 | UID1439 | chr16 | NM_001005524 | 59112794 | 59123235 | 59061403 | 59062324 | - | -100k | - | AS | olfactory receptor 194                        |
| 1315 | UID1439 | chr16 | NM_146998    | 59112794 | 59123235 | 59091107 | 59092034 | - | -50k  | + | AS | olfactory receptor 195                        |
| 1316 | UID1439 | chr16 | NM_146779    | 59112794 | 59123235 | 59109467 | 59110397 | - | -5k   | - | AS | olfactory receptor 196                        |
| 1317 | UID1439 | chr16 | NM_146484    | 59112794 | 59123235 | 59127811 | 59128737 | - | +20k  | - | S  | olfactory receptor 197                        |
| 1318 | UID1439 | chr16 | NM_001011808 | 59112794 | 59123235 | 59143759 | 59144680 | - | +50k  | - | S  | olfactory receptor 198                        |
| 1319 | UID1439 | chr16 | NM_146994    | 59112794 | 59123235 | 59210994 | 59211921 | - | +100k | - | S  | olfactory receptor 201                        |
| 1320 | UID1439 | chr16 | NM_207550    | 59112794 | 59123235 | 59157941 | 59158867 | - | +50k  | - | S  | olfactory receptor 199                        |
| 1321 | UID1443 | chr16 | NM_026439    | 44968523 | 44978922 | 45013384 | 45047256 | - | +50k  | + | AS | steroid-sensitive protein 1 precursor         |
| 1322 | UID1443 | chr16 | NM_028756    | 44968523 | 44978922 | 45058904 | 45078005 | - | +100k | - | S  | solute carrier family 35, member A5           |
| 1323 | UID1448 | chr14 | NM_177624    | 12431524 | 12442007 | 12464142 | 12476415 | + | +50k  | + | AS | sentan                                        |
| 1324 | UID1449 | chr14 | NM_177624    | 12484584 | 12495025 | 12464142 | 12476415 | + | -50k  | + | S  | sentan                                        |
| 1325 | UID1455 | chr14 | NM_177816    | 39750484 | 39760882 | 39724580 | 39801678 | + | -50k  | - | AS | SH2 domain containing 4B                      |
| 1326 | UID1455 | chr14 | NM_145928    | 39750484 | 39760882 | 39815156 | 39875520 | + | +100k | - | AS | tetraspanin 14                                |
| 1327 | UID1456 | chr14 | NM_013542    | 55146899 | 55157340 | 55212927 | 55216331 | + | +100k | - | AS | granzyme B precursor                          |

|      |         |       |              |           |           |           |           |   |       |   |    |                                                |
|------|---------|-------|--------------|-----------|-----------|-----------|-----------|---|-------|---|----|------------------------------------------------|
| 1328 | UID1456 | chr14 | NM_010373    | 55146899  | 55157340  | 55071689  | 55074696  | + | -100k | - | AS | granzyme E precursor                           |
| 1329 | UID1456 | chr14 | NM_010372    | 55146899  | 55157340  | 55083638  | 55086664  | + | -100k | - | AS | granzyme D                                     |
| 1330 | UID1456 | chr14 | NM_010375    | 55146899  | 55157340  | 55110651  | 55113650  | + | -50k  | - | AS | granzyme G precursor                           |
| 1331 | UID1456 | chr14 | NM_153052    | 55146899  | 55157340  | 55119866  | 55128667  | + | -50k  | - | AS | granzyme N                                     |
| 1332 | UID1456 | chr14 | NM_010374    | 55146899  | 55157340  | 55159333  | 55165478  | + | +20k  | - | AS | granzyme F precursor                           |
| 1333 | UID1456 | chr14 | NM_007800    | 55146899  | 55157340  | 55053951  | 55056645  | + | -100k | - | AS | cathepsin G preproprotein                      |
| 1334 | UID1456 | chr14 | NM_010371    | 55146899  | 55157340  | 55185471  | 55188727  | + | +50k  | - | AS | granzyme C preproprotein                       |
| 1335 | UID1458 | chr14 | NM_027436    | 59826361  | 59836802  | 59738675  | 59857723  | + | -100k | + | S  | mitochondrial intermediate peptidase precursor |
| 1336 | UID1458 | chr14 | NM_013869    | 59826361  | 59836802  | 59918145  | 60000579  | + | +100k | - | AS | tumor necrosis factor receptor superfamily,    |
| 1337 | UID1469 | chr14 | NM_145467    | 122741399 | 122751840 | 122795319 | 123109259 | + | +100k | + | AS | integrin, beta-like 1 precursor                |
| 1338 | UID1488 | chr14 | NM_013542    | 55141405  | 55151846  | 55212927  | 55216331  | - | +100k | - | S  | granzyme B precursor                           |
| 1339 | UID1488 | chr14 | NM_010373    | 55141405  | 55151846  | 55071689  | 55074696  | - | -100k | - | AS | granzyme E precursor                           |
| 1340 | UID1488 | chr14 | NM_010372    | 55141405  | 55151846  | 55083638  | 55086664  | - | -100k | - | AS | granzyme D                                     |
| 1341 | UID1488 | chr14 | NM_010375    | 55141405  | 55151846  | 55110651  | 55113650  | - | -50k  | - | AS | granzyme G precursor                           |
| 1342 | UID1488 | chr14 | NM_153052    | 55141405  | 55151846  | 55119866  | 55128667  | - | -50k  | - | AS | granzyme N                                     |
| 1343 | UID1488 | chr14 | NM_010374    | 55141405  | 55151846  | 55159333  | 55165478  | - | +20k  | - | S  | granzyme F precursor                           |
| 1344 | UID1488 | chr14 | NM_007800    | 55141405  | 55151846  | 55053951  | 55056645  | - | -100k | - | AS | cathepsin G preproprotein                      |
| 1345 | UID1488 | chr14 | NM_010371    | 55141405  | 55151846  | 55185471  | 55188727  | - | +50k  | - | S  | granzyme C preproprotein                       |
| 1346 | UID1489 | chr14 | NM_146494    | 48799343  | 48809784  | 48816208  | 48823892  | - | +20k  | - | S  | olfactory receptor 722                         |
| 1347 | UID1489 | chr14 | NM_001011530 | 48799343  | 48809784  | 48850563  | 48851493  | - | +100k | - | S  | olfactory receptor 723                         |
| 1348 | UID1489 | chr14 | NM_146492    | 48799343  | 48809784  | 48882091  | 48883021  | - | +100k | - | S  | olfactory receptor 724                         |
| 1349 | UID1491 | chr14 | NM_007479    | 25530431  | 25540872  | 25471380  | 25490442  | - | -100k | + | AS | ADP-ribosylation factor 4                      |
| 1350 | UID1491 | chr14 | NM_178668    | 25530431  | 25540872  | 25497300  | 25503030  | - | -50k  | - | AS | 2'-phosphodiesterase                           |
| 1351 | UID1497 | chrY  | NM_011667    | 85740     | 96181     | 155155    | 180667    | + | +100k | + | AS | ubiquitin-activating enzyme E1, Chr Y 1        |
| 1352 | UID1497 | chrY  | NM_009570    | 85740     | 96181     | 61649     | 133852    | + | -50k  | - | AS | zinc finger protein 1, Y linked                |
| 1353 | UID1498 | chrY  | NM_012011    | 332352    | 342793    | 347054    | 365037    | + | +20k  | + | AS | eukaryotic translation initiation factor 2,    |
| 1354 | UID1498 | chrY  | NM_011419    | 332352    | 342793    | 234230    | 280254    | + | -100k | + | S  | jumonji, AT rich interactive domain 1D (Rbp2   |
| 1355 | UID1498 | chrY  | NR_027507    | 332352    | 342793    | 392206    | 395311    | + | +100k | - | AS |                                                |
| 1356 | UID1499 | chrY  | NM_009571    | 1481822   | 1492263   | 1391082   | 1455317   | - | -100k | - | AS | zinc finger protein 2, Y linked                |
