# Supplementary material for: The Impact of CpG Island on Defining Transcriptional Activation of the Mouse L1 Retrotransposable Elements
Source: PubMed Central journal article supplement (PMC2894050; doi:10.1371/journal.pone.0011353), 2010-06-29
Supplement: pone.0011353.s006.pdf [file pone.0011353.s006.pdf]

**Table 6: List of tissue-specific genes in the vicinity of L1 elements within 20-kb distance**

**Neighboring genes in sense orientation**

| No | LINE ID | Chr   | LINE strand | Distance | RefSeq strand | CpG island | RefSeq ID    | Cell/Tissue       | RefSeq Definition                                                                    | Biological function                                                     |
|----|---------|-------|-------------|----------|---------------|------------|--------------|-------------------|--------------------------------------------------------------------------------------|-------------------------------------------------------------------------|
| 1  | UID1230 | chr7  | +           | -5k      | +             | X          | NM_146959    |                   | olfactory receptor 631 (Olfr631), 1482bp                                             |                                                                         |
| 2  | UID285  | chr2  | +           | -5k      | +             | 1 (5'UTR)  | NM_001004174 | testis, intestine | expressed sequence AA467197 (AA467197), 672bp                                        | Normal mucosa of esophagus-specific gene 1 protein                      |
| 3  | UID1281 | chr10 | +           | -5k      | +             | X          | NM_011217    | brain             | protein tyrosine phosphatase, receptor type, R (Ptprr), 3430bp                       | Sequesters MAPKs                                                        |
| 4  | UID45   | chr18 | -           | +10k     | -             | X          | NM_177450    | brain             | carnosine dipeptidase 1                                                              | Catalysis of the hydrolysis of peptide bonds                            |
| 5  | UID1284 | chr10 | -           | +10k     | -             | X          | NM_029134    | testicle          | eucine-rich repeats and IQ motif containing 1 (Lrriq1), 2560bp                       |                                                                         |
| 6  | UID790  | chrX  | -           | +10k     | -             | X          | NM_175179    | kidney            | Mus musculus family with sequence similarity 123, member B (Fam123b), mRNA           | Involved in kidney development                                          |
| 7  | UID866  | chrX  | -           | +10k     | -             | X          | NM_007807    | Liver             | cytochrome b-245, beta polypeptide (Cybb), 3242bp                                    | Electron transport, Ion transport, Transport                            |
| 8  | UID1390 | chr6  | -           | +10k     | -             | X          | NM_053218    | pancreas          | vomeronal 1 receptor, A3                                                             | Combining with a pheromone to initiate a change in cell activity        |
| 9  | UID339  | chr2  | -           | +20k     | -             | X          | NM_146984    |                   | olfactory receptor 142 (Olfr142), 918bp                                              |                                                                         |
| 10 | UID63   | chr18 | -           | +20k     | -             | 2 (5'UTR)  | NM_139143    | brain, testis     | solute carrier family 39 (metal ion transporter), member 6 (Slc39a6), 3287bp         | zinc-influx transporter                                                 |
| 11 | UID312  | chr2  | -           | +20k     | -             | X          | NM_021527    | wide              | McKusick-Kaufman syndrome protein (Mkks), 2699bp                                     | protein processing in limb, cardiac and reproductive system development |
| 12 | UID312  | chr2  | -           | +20k     | -             | X          | NM_001141946 | wide              | McKusick-Kaufman syndrome protein (Mkks), 2699bp                                     | protein processing in limb, cardiac and reproductive system development |
| 13 | UID1398 | chr6  | -           | +20k     | -             | X          | NM_134177    | Brain             | vomeronal 1 receptor, C22 (V1rc22), 909BP                                            | G-protein coupled receptor protein signaling pathway                    |
| 14 | UID837  | chrX  | -           | +20k     | -             | X          | NM_001018063 | lung              | CAAX box 1 homolog B (human) (Cxx1b), 1246bp                                         |                                                                         |
| 15 | UID578  | chr13 | -           | +20k     | -             | X          | NM_134225    | pancreas          | vomeronal 1 receptor, I9 (V1ri9), 960bp                                              | G-protein coupled receptor protein signaling pathway                    |
| 16 | UID782  | chrX  | -           | +20k     | -             | X          | NM_009592    | tymus             | ATP-binding cassette, sub-family B (MDR/TAP),                                        | the active transport of a substance across a membrane                   |
| 17 | UID1439 | chr16 | -           | +20k     | -             | X          | NM_146484    |                   | olfactory receptor 197 (Olfr197), 930bp                                              |                                                                         |
| 18 | UID1489 | chr14 | -           | +20k     | -             | X          | NM_146494    |                   | olfactory receptor 722 (Olfr722), 1655bp                                             |                                                                         |
| 19 | UID755  | chrX  | -           | +20k     | -             | X          | NM_019656    | pancreas          | tetraspanin 6 (Tspan6), 1741bp                                                       | Modulates exocytosis and secretion of hormones in the pancreas          |
| 20 | UID976  | chr4  | -           | +20k     | -             | X          | NM_011211    | Brain             | protein tyrosine phosphatase, receptor type, D (Ptprd), transcript variant a, 7678bp | protein tyrosine phosphatase activity                                   |
| 21 | UID976  | chr4  | -           | +20k     | -             | X          | NM_001014288 | Brain             | protein tyrosine phosphatase, receptor type, D (Ptprd), transcript variant b, 8360bp | protein tyrosine phosphatase activity                                   |
| 22 | UID1488 | chr14 | -           | +20k     | -             | X          | NM_010374    | Brain             | granzyme F (Gzmf), 1027bp                                                            | target cell lysis in cell-mediated immune responses                     |
| 23 | UID343  | chr2  | -           | +20k     | -             | X          | NM_146753    | muscle            | olfactory receptor 1195 (Olfr1195), 927bp                                            |                                                                         |
| 24 | UID524  | chr19 | +           | -20k     | +             | X          | NM_146990    |                   | olfactory receptor 1494 (Olfr1494), 948bp                                            |                                                                         |
| 25 | UID705  | chrX  | +           | -20k     | +             | 1 (5'UTR)  | NM_183320    | testicle          | hypothetical protein 4930481M05 (4930481M05), 3521bp                                 |                                                                         |
| 26 | UID704  | chrX  | +           | -20k     | +             | 1 (5'UTR)  | NM_183320    | testicle          | hypothetical protein 4930481M05 (4930481M05), 3521bp                                 |                                                                         |
| 27 | UID705  | chrX  | +           | -20k     | +             | 1 (5'UTR)  | NM_183320    | testicle          | hypothetical protein 4930481M05 (4930481M05), 3521bp                                 |                                                                         |
| 28 | UID704  | chrX  | +           | -20k     | +             | 1 (5'UTR)  | NM_183320    | testicle          | hypothetical protein 4930481M05 (4930481M05), 3521bp                                 |                                                                         |
| 29 | UID717  | chrX  | +           | -20k     | +             | X          | NM_029199    | Testis            | hypothetical protein LOC75185, RIKEN cDNA 4930542N07 gene (4930542N07Rik)            |                                                                         |
| 30 | UID1230 | chr7  | +           | -20k     | +             | X          | NM_013616    |                   | olfactory receptor 64 (Olfr64), 1991bp                                               |                                                                         |
| 31 | UID939  | chr4  | +           | -20k     | +             | X          | NM_001007579 | brain             | hypothetical protein LOC329986, cDNA sequence BC080695 (BC080695), 2123bp            |                                                                         |
| 32 | UID929  | chr4  | +           | -20k     | +             | X          | NM_001081264 |                   | dolichyl pyrophosphate Man9GlcNAc2                                                   |                                                                         |
| 33 | UID175  | chr11 | +           | -20k     | +             | X          | NM_146468    |                   | olfactory receptor 1391 (Olfr1391), 936bp                                            |                                                                         |
| 34 | UID268  | chr2  | +           | -20k     | +             | X          | NM_146365    |                   | olfactory receptor 1094 (Olfr1094), 993bp                                            |                                                                         |
| 35 | UID1231 | chr7  | +           | -20k     | +             | X          | NM_147056    | brian             | olfactory receptor 646 (Olfr646), 939bp                                              |                                                                         |

Neighboring genes in antisense orientation

| No | LINE ID | Chr   | LINE strand | Distance | RefSeq strand | CpG island | RefSeq ID    | Cell/tissue      | Refseq Definition                                                                         | Biological function                                                                 |
|----|---------|-------|-------------|----------|---------------|------------|--------------|------------------|-------------------------------------------------------------------------------------------|-------------------------------------------------------------------------------------|
| 1  | UID325  | chr2  | -           | -5k      | -             | X          | NM_029790    | wide (brain)     | methyltransferase 5 domain containing 1 (Mett5d1), 1892bp                                 | methyltransferase activity                                                          |
| 2  | UID342  | chr2  | -           | -5k      | -             | X          | NM_146464    |                  | olfactory receptor 1196 (Olf1196), 966bp                                                  |                                                                                     |
| 3  | UID547  | chr19 | -           | -5k      | -             | X          | NM_144785    | Kidney           | solute carrier family 22 (organic anion transporter), member 19 (Slc22a19), 1964bp        | organic anion transport                                                             |
| 4  | UID1439 | chr16 | -           | -5k      | -             | X          | NM_146779    |                  | olfactory receptor 196 (Olf196), 930bp                                                    |                                                                                     |
| 5  | UID487  | chr1  | -           | -10k     | -             | X          | NM_010778    | Testis           | CD46 antigen, complement regulatory protein (Cd46), 1214bp                                | the fusion of the spermatozoa with the oocyte during fertilization                  |
| 6  | UID745  | chrX  | -           | -10k     | -             | 1 (5'UTR)  | NM_009121    | kidney and color | spermidine/spermine N1-acetyl transferase 1 (Sat1), 1233bp                                | catalyzes the acetylation of polyamines                                             |
| 7  | UID1238 | chr7  | -           | -10k     | -             | X          | NM_146822    |                  | olfactory receptor 640 (Olf640), 945bp                                                    |                                                                                     |
| 8  | UID45   | chr18 | -           | +10k     | +             | X          | NM_177450    | kidney           | carnosine dipeptidase 1 (metallopeptidase M20 family) (Cndp1), 2814bp                     | proteolysis                                                                         |
| 9  | UID198  | chr11 | -           | -20k     | -             | X          | NM_146878    |                  | olfactory receptor 30 (Olf30), 948bp                                                      |                                                                                     |
| 10 | UID330  | chr2  | -           | -20k     | -             | X          | NM_175161    | Testis           | RIKEN cDNA 4931422A03 gene (4931422A03Rik), 1038bp                                        |                                                                                     |
| 11 | UID340  | chr2  | -           | -20k     | -             | X          | NM_146985    |                  | olfactory receptor 1270 (Olf1270), 915bp                                                  |                                                                                     |
| 12 | UID488  | chr1  | -           | -20k     | -             | X          | NM_146106    | Kidney           | lysophospholipase-like 1 (Lyp1l1), 1442bp                                                 | hydrolase activity                                                                  |
| 13 | UID578  | chr13 | -           | -20k     | -             | X          | NM_145845    |                  | vomeronal 1 receptor, I1 (V1r1), 903bp                                                    | G-protein coupled receptor protein signaling pathway                                |
| 14 | UID783  | chrX  | -           | -20k     | -             | X          | NM_031384    | Testis           | testis expressed gene 11 (Tex11), 3233bp                                                  |                                                                                     |
| 15 | UID811  | chrX  | -           | -20k     | -             | X          | NM_031493    | Testis           | X-linked lymphocyte-regulated 5C (Xlr5c), 540bp                                           |                                                                                     |
| 16 | UID812  | chrX  | -           | -20k     | -             | X          | NM_019405    | wide (brain)     | centrin 2 (Cetn2), 1187bp, non Start codon (ORF2: N)                                      | microtubule-organizing center structure and function                                |
| 17 | UID837  | chrX  | -           | -20k     | -             | X          | NM_001018063 | lung             | CAAX box 1 homolog A (human) (Cxx1a), 1208bp                                              |                                                                                     |
| 18 | UID988  | chr4  | -           | -20k     | -             | X          | NM_001009550 |                  | bM64F17.3 (putative novel protein) (bM64F17.1), 1046bp                                    |                                                                                     |
| 19 | UID1063 | chr8  | -           | -20k     | -             | X          | NM_007954    | Liver, kidney    | esterase 1 (Es1), 1840bp                                                                  | the detoxification of xenobiotics and in the activation of ester and amide prodrugs |
| 20 | UID1168 | chr17 | -           | -20k     | -             | X          | NM_177825    | pancrease        | hypothetical protein A130033B22 (A130033B22), 2587bp                                      |                                                                                     |
| 21 | UID1238 | chr7  | -           | -20k     | -             | X          | NM_147084    |                  | olfactory receptor 639 (Olf639), 951bp                                                    |                                                                                     |
| 22 | UID1329 | chr12 | -           | -20k     | -             | 1 (5'UTR)  | NM_011175    | kidney           | legumain (Lgmn), 1889bp                                                                   | Has a strict specificity for hydrolysis of asparaginyl bonds                        |
| 23 | UID473  | chr1  | +           | +20k     | +             | X          | NM_145509    |                  | RIKEN cDNA 5430435G22 gene (5430435G22Rik), 2909bp                                        | Protein transport (GTP and Rab family)                                              |
| 24 | UID524  | chr19 | +           | +20k     | +             | X          | NM_146989    |                  | olfactory receptor 1496 (Olf1496), 954bp                                                  |                                                                                     |
| 25 | UID556  | chr13 | +           | +20k     | +             | X          | NM_011455    | placenta         | serine (or cysteine) peptidase inhibitor, clade B, member 9g (Serpinb9g), 1919bp          | serine-type endopeptidase inhibitor activity                                        |
| 26 | UID1088 | chr5  | +           | +20k     | +             | X          | NM_011076    | Intestin         | ATP-binding cassette, sub-family B (MDR/TAP), member 1A (Abcb1a), 4924bp                  | Mediates ATP-dependent export of organic anions and drugs from the cytoplasm        |
| 27 | UID1230 | chr7  | +           | +20k     | +             | X          | NM_147119    |                  | olfactory receptor 632 (Olf632), 954bp                                                    |                                                                                     |
| 28 | UID1498 | chrY  | +           | +20k     | +             | X          | NM_012011    | prostate         | eukaryotic translation initiation factor 2, subunit 3, structural gene Y-linked (Eif2s3y) | DNA, protein and zinc ion binding                                                   |

X represents the absence of CpG island; 1(5'UTR) indicates the presence of CpG island at the 5'-UTR promoter region  
 Highlighted genes are orientated in sense directions within 5-kb distance of nearby L1 elements
