# Supplementary material for: The Impact of CpG Island on Defining Transcriptional Activation of the Mouse L1 Retrotransposable Elements
Source: PubMed Central journal article supplement (PMC2894050; doi:10.1371/journal.pone.0011353), 2010-06-29
Supplement: pone.0011353.s007.pdf [file pone.0011353.s007.pdf]

**Table 7: The mutation rates at the YY1 transcription binding sites in Tf subfamily**

**YY1 binding sites**

**Mouse L1 with neighboring genes**

|                 | activity     |     | activity     |     | activity     |     |              | activity     |              | Total      | CpG       |    |
|-----------------|--------------|-----|--------------|-----|--------------|-----|--------------|--------------|--------------|------------|-----------|----|
|                 | +++          | CpG | ++           | CpG | +            | CpG |              | -            | CpG          |            |           |    |
| <b>Total</b>    | <b>105</b>   | 13  | <b>58</b>    | 3   | <b>79</b>    | 6   | <b>22</b>    | <b>65</b>    | <b>20</b>    | <b>307</b> | <b>42</b> |    |
| ratio (%)       | <b>34.20</b> |     | <b>18.89</b> |     | <b>25.73</b> |     | <b>52.38</b> | <b>21.17</b> | <b>47.62</b> |            |           |    |
| mutation of YY1 | <b>+/+</b>   | 91  | 10           | 47  | 2            | 60  | 3            | 15           | 13           | 3          | 211       | 18 |
| ratio (%)       | 86.67        |     | 81.03        |     | 75.95        |     | 83.33        | 20.00        | 16.67        | 68.73      |           |    |
| mutation of YY1 | <b>+/-</b>   | 14  | 3            | 11  | 1            | 19  | 3            | 7            | 52           | 17         | 96        | 24 |
| ratio (%)       | 13.33        |     | 18.97        |     | 24.05        |     | 29.17        | 80.00        | 70.83        | 31.27      |           |    |

\* 17 L1s have one monomer

\* 290 L1s have at least two monomers

**Mouse L1 without neighboring genes**

|                 | activity     |     | activity     |     | activity     |     |              | activity     |              | Total      | CpG       |    |
|-----------------|--------------|-----|--------------|-----|--------------|-----|--------------|--------------|--------------|------------|-----------|----|
|                 | +++          | CpG | ++           | CpG | +            | CpG |              | -            | CpG          |            |           |    |
| <b>Total</b>    | <b>190</b>   | 16  | <b>149</b>   | 5   | <b>132</b>   | 12  | <b>33</b>    | <b>97</b>    | <b>25</b>    | <b>568</b> | <b>58</b> |    |
| ratio (%)       | <b>33.45</b> |     | <b>26.23</b> |     | <b>23.24</b> |     | <b>56.90</b> | <b>17.08</b> | <b>43.10</b> |            |           |    |
| mutation of YY1 | <b>+/+</b>   | 164 | 11           | 131 | 2            | 103 | 1            | 14           | 34           | 1          | 432       | 15 |
| ratio (%)       | 86.32        |     | 87.92        |     | 78.03        |     | 93.33        | 35.05        | 6.67         | 76.06      |           |    |
| mutation of YY1 | <b>+/-</b>   | 26  | 5            | 18  | 3            | 29  | 11           | 19           | 63           | 24         | 136       | 43 |
| ratio (%)       | 13.68        |     | 12.08        |     | 21.97        |     | 44.19        | 64.95        | 55.81        | 23.94      |           |    |

\* 39 L1s have one monomer

\* 529 L1s have at least two monomers
